# Supplementary material for: Critical assessment of genome-scale metabolic models of Arabidopsis thaliana
Source: Royal Society of Chemistry journal article supplement (doi:10.1039/d1mo00351h), 2021-12-16
Supplement: d1mo00351h1.xlsx [file d1mo00351h1.xlsx]

## Sheet: AraModel2012
Reaction	GPR	Subsystem
NAD+_m + isocitrate_m <=> NADH_m + CO2_m + H+_m + alpha-ketoglutarate_m	AT5G03290 or AT4G35650 or AT4G35260 or AT3G09810 or AT2G17130	Citrate cycle (TCA cycle)/Biosynthesis of terpenoids and steroids/Biosynthesis of alkaloids derived from shikimate pathway/Biosynthesis of alkaloids derived from ornithine, lysine and nicotinic acid/Biosynthesis of alkaloids derived from histidine and purine/Biosynthesis of alkaloids derived from terpenoid and polyketide
H2O_d + D-myo-inositol_(1,4,5)-trisphosphate_d <=> 2 H+_d + phosphate_d + D-myo-inositol_(1,4)-bisphosphate_d	AT2G31830 or AT1G65580 or AT1G05630 or AT4G18010 or AT2G43900 or AT1G34120 or AT1G71710	Inositol phosphate metabolism/Phosphatidylinositol signaling system
sucrose-6-phosphate_c + H2O_c <=> beta-D-glucose-6-phosphate_c + D-fructose_c	AT1G35580 or AT1G62660 or AT3G52600 or AT2G36190 or AT3G13784 or AT1G55120 or AT5G22510 or AT4G34860 or AT4G09510 or AT3G13790 or AT3G05820 or AT3G06500 or AT1G12240 or AT1G72000 or AT1G22650 or AT1G56560	Starch and sucrose metabolism
sucrose-6-phosphate_d + H2O_d <=> beta-D-glucose-6-phosphate_d + D-fructose_d	AT1G35580 or AT1G62660 or AT3G52600 or AT2G36190 or AT3G13784 or AT1G55120 or AT5G22510 or AT4G34860 or AT4G09510 or AT3G13790 or AT3G05820 or AT3G06500 or AT1G12240 or AT1G72000 or AT1G22650 or AT1G56560	Starch and sucrose metabolism
sucrose-6-phosphate_v + H2O_v <=> beta-D-glucose-6-phosphate_v + D-fructose_v	AT1G35580 or AT1G62660 or AT3G52600 or AT2G36190 or AT3G13784 or AT1G55120 or AT5G22510 or AT4G34860 or AT4G09510 or AT3G13790 or AT3G05820 or AT3G06500 or AT1G12240 or AT1G72000 or AT1G22650 or AT1G56560	Starch and sucrose metabolism
5-hydroxyisourate_x + H2O_x -> 5-hydroxy-2-oxo-4-ureido-2,5-dihydro-1H_imidazole-5-carboxylate_x	AT5G16580 or AT1G45191 or AT4G27820 or AT1G60090 or AT1G02850 or AT3G62740 or AT3G62750 or AT4G27830 or AT4G22100	Purine metabolism
1,2-dihydroxy-3-keto-5-methylthiopentene_c + O2_c -> formate_c + 2-oxo-4-methylthiobutanoate_c	AT4G14710 or AT4G14716	Cysteine and methionine metabolism
1,2-dihydroxy-3-keto-5-methylthiopentene_m + O2_m -> formate_m + 2-oxo-4-methylthiobutanoate_m	AT4G14710 or AT4G14716	Cysteine and methionine metabolism
H2O_m + acrylamide_m -> ammonia_m + acrylate_m	AT5G09420	Styrene degradation
NAD+_d + H2O_d + retinal_d <=> NADH_d + H+_d + retinoate_d	AT3G42960 or AT3G29250 or AT2G29170 or AT4G13250 or AT5G04900 or AT4G05530 or AT4G03140	Retinol metabolism
NAD+_x + H2O_x + retinal_x <=> NADH_x + H+_x + retinoate_x	AT3G42960 or AT3G29250 or AT2G29170 or AT4G13250 or AT5G04900 or AT4G05530 or AT4G03140	Retinol metabolism
NAD+_d + retinol_d <=> NADH_d + H+_d + retinal_d	AT1G64590 or AT5G15940 or AT3G59710 or AT5G53100 or AT5G04070 or AT5G02540 or AT5G10050 or AT4G23420 or AT5G61830 or AT4G11410 or AT5G50130 or AT5G53090 or AT5G51030 or AT4G27760 or AT3G03350 or AT4G09750 or AT4G23430 or AT2G37540 or AT4G24050	Retinol metabolism
ATP_m + riboflavin_m -> ADP_m + FMN_m	AT5G57440 or AT4G25840 or AT4G11570 or AT3G48420 or AT2G38740 or AT4G39970 or AT1G56500 or AT4G21470	Riboflavin metabolism
ATP_d + riboflavin_d -> ADP_d + FMN_d	AT5G57440 or AT4G25840 or AT4G11570 or AT3G48420 or AT2G38740 or AT4G39970 or AT1G56500 or AT4G21470	Riboflavin metabolism
H+_c + coumaroyl-CoA_c + NADPH_c -> coenzyme_A_c + coumaraldehyde_c + NADP+_c	AT5G14700 or AT4G30470 or AT2G23910 or AT1G80820 or AT1G76470 or AT1G15950	Phenylpropanoid biosynthesis/Biosynthesis of phenylpropanoids
H+_m + coumaroyl-CoA_m + NADPH_m -> coenzyme_A_m + coumaraldehyde_m + NADP+_m	AT5G14700 or AT4G30470 or AT2G23910 or AT1G80820 or AT1G76470 or AT1G15950	Phenylpropanoid biosynthesis/Biosynthesis of phenylpropanoids
H+_r + coumaroyl-CoA_r + NADPH_r -> coenzyme_A_r + coumaraldehyde_r + NADP+_r	AT5G14700 or AT4G30470 or AT2G23910 or AT1G80820 or AT1G76470 or AT1G15950	Phenylpropanoid biosynthesis/Biosynthesis of phenylpropanoids
H+_x + coumaroyl-CoA_x + NADPH_x -> coenzyme_A_x + coumaraldehyde_x + NADP+_x	AT5G14700 or AT4G30470 or AT2G23910 or AT1G80820 or AT1G76470 or AT1G15950	Phenylpropanoid biosynthesis/Biosynthesis of phenylpropanoids
H+_c + coumaraldehyde_c + NADPH_c -> NADP+_c + coumaryl-alcohol_c	AT4G39330 or AT4G37970 or AT2G21890 or AT2G21730 or AT1G66800 or AT5G19440 or AT1G72680 or AT1G51410 or AT1G09510 or AT1G09500 or AT1G09490 or AT1G09480 or AT3G19450 or AT4G34230	Phenylpropanoid biosynthesis/Biosynthesis of phenylpropanoids
H2O_d + adenosine_3',5'-bisphosphate_d -> AMP_d + 3 H+_d + phosphate_d	AT4G05090 or AT5G09290 or AT5G64000 or AT5G63990 or AT5G63980	-
H+_c + feruloyl-CoA_c + NADPH_c -> coenzyme_A_c + NADP+_c + coniferyl_aldehyde_c	AT5G14700 or AT4G30470 or AT2G23910 or AT1G80820 or AT1G76470 or AT1G15950	Phenylpropanoid biosynthesis/Biosynthesis of phenylpropanoids
H+_r + feruloyl-CoA_r + NADPH_r -> coenzyme_A_r + coniferyl_aldehyde_r + NADP+_r	AT5G14700 or AT4G30470 or AT2G23910 or AT1G80820 or AT1G76470 or AT1G15950	Phenylpropanoid biosynthesis/Biosynthesis of phenylpropanoids
H+_x + feruloyl-CoA_x + NADPH_x -> coenzyme_A_x + coniferyl_aldehyde_x + NADP+_x	AT5G14700 or AT4G30470 or AT2G23910 or AT1G80820 or AT1G76470 or AT1G15950	Phenylpropanoid biosynthesis/Biosynthesis of phenylpropanoids
ATP_c + coenzyme_A_c + 5-hydroxy-ferulic-acid_c -> AMP_c + diphosphate_c + 5-hydroxy-feruloyl-CoA_c	AT3G21240 or AT3G21230 or AT1G62940 or AT1G55320 or AT5G23050 or AT1G51680 or AT1G65060	Phenylpropanoid biosynthesis
H+_c + sinapaldehyde_c + NADPH_c -> sinapyl-alcohol_c + NADP+_c	AT3G19450 or AT4G39330 or AT4G37970 or AT2G21890 or AT2G21730 or AT1G66800 or AT1G09480 or AT1G09490 or AT1G09500 or AT1G09510 or AT1G51410 or AT1G72680 or AT5G19440 or AT4G34230	Phenylpropanoid biosynthesis/Biosynthesis of phenylpropanoids
indole-3-acetonitrile_c + 2 H2O_c -> ammonia_c + indole-3-acetate_c	AT3G44300 or AT3G44310 or AT3G44320 or AT5G22300 or AT4G08790	Tryptophan metabolism
ATP_c + 4-coumarate_c + coenzyme_A_c -> AMP_c + coumaroyl-CoA_c + diphosphate_c	AT1G62940 or AT1G55320 or AT5G23050 or AT5G38120 or AT4G19010 or AT3G21240 or AT1G65060 or AT3G21230 or AT1G51680	Ubiquinone and other terpenoid-quinone biosynthesis/Phenylalanine metabolism/Phenylpropanoid biosynthesis/Biosynthesis of phenylpropanoids/Biosynthesis of alkaloids derived from shikimate pathway
ATP_x + coenzyme_A_x + 4-coumarate_x -> AMP_x + coumaroyl-CoA_x + diphosphate_x	AT1G62940 or AT1G55320 or AT5G23050 or AT5G38120 or AT4G19010 or AT3G21240 or AT1G65060 or AT3G21230 or AT1G51680	Ubiquinone and other terpenoid-quinone biosynthesis/Phenylalanine metabolism/Phenylpropanoid biosynthesis/Biosynthesis of phenylpropanoids/Biosynthesis of alkaloids derived from shikimate pathway
sucrose_d + H2O_d -> alpha-D-glucose_d + D-fructose_d	AT3G13790 or AT5G22510 or AT4G34860 or AT4G09510 or AT3G06500 or AT3G05820 or AT1G72000 or AT1G56560 or AT1G35580 or AT1G12240 or AT1G22650	Starch and sucrose metabolism
sucrose_v + H2O_v -> alpha-D-glucose_v + D-fructose_v	AT3G13790 or AT5G22510 or AT4G34860 or AT4G09510 or AT3G06500 or AT3G05820 or AT1G72000 or AT1G56560 or AT1G35580 or AT1G12240 or AT1G22650	Starch and sucrose metabolism
coumaroyl-CoA_m + quinate_m <=> coenzyme_A_m + 4-coumaroylquinate_m	AT3G48720 or AT5G41040 or AT5G63560 or AT5G48930	Phenylpropanoid biosynthesis/Flavonoid biosynthesis/Stilbenoid, diarylheptanoid and gingerol biosynthesis/Biosynthesis of phenylpropanoids
coumaroyl-CoA_r + quinate_r <=> coenzyme_A_r + 4-coumaroylquinate_r	AT3G48720 or AT5G41040 or AT5G63560 or AT5G48930	Phenylpropanoid biosynthesis/Flavonoid biosynthesis/Stilbenoid, diarylheptanoid and gingerol biosynthesis/Biosynthesis of phenylpropanoids
H+_c + coniferyl_aldehyde_c + NADPH_c -> coniferyl_alcohol_c + NADP+_c	AT4G39330 or AT4G37970 or AT2G21890 or AT2G21730 or AT1G66800 or AT5G19440 or AT1G72680 or AT1G51410 or AT1G09510 or AT1G09500 or AT1G09490 or AT1G09480 or AT3G19450 or AT4G34230	Phenylpropanoid biosynthesis/Biosynthesis of phenylpropanoids
caffeoylshikimate_c + coenzyme_A_c -> shikimate_c + caffeoyl-CoA_c	AT3G48720 or AT5G63560 or AT5G48930	Phenylpropanoid biosynthesis/Flavonoid biosynthesis/Stilbenoid, diarylheptanoid and gingerol biosynthesis/Biosynthesis of phenylpropanoids
caffeoylshikimate_m + coenzyme_A_m -> shikimate_m + caffeoyl-CoA_m	AT3G48720 or AT5G63560 or AT5G48930	Phenylpropanoid biosynthesis/Flavonoid biosynthesis/Stilbenoid, diarylheptanoid and gingerol biosynthesis/Biosynthesis of phenylpropanoids
caffeoylshikimate_r + coenzyme_A_r -> shikimate_r + caffeoyl-CoA_r	AT3G48720 or AT5G63560 or AT5G48930	Phenylpropanoid biosynthesis/Flavonoid biosynthesis/Stilbenoid, diarylheptanoid and gingerol biosynthesis/Biosynthesis of phenylpropanoids
caffeoyl-CoA_m + quinate_m <=> coenzyme_A_m + caffeoylquinate_m	AT3G48720 or AT5G63560 or AT5G48930	Phenylpropanoid biosynthesis/Flavonoid biosynthesis/Stilbenoid, diarylheptanoid and gingerol biosynthesis
caffeoyl-CoA_r + quinate_r <=> coenzyme_A_r + caffeoylquinate_r	AT3G48720 or AT5G63560 or AT5G48930	Phenylpropanoid biosynthesis/Flavonoid biosynthesis/Stilbenoid, diarylheptanoid and gingerol biosynthesis
indole-3-acetyl-ala_r + H2O_r <=> indole-3-acetate_r + L-alanine_r	AT5G56650 or AT1G51780 or AT1G44350 or AT5G56660 or AT1G51760	IAA biosynthesis II
H2O_r + indole-3-acetyl-leu_r <=> indole-3-acetate_r + L-leucine_r	AT5G54140 or AT3G02875	IAA biosynthesis II
isoliquiritigenin_c <=> liquiritigenin_c	AT3G55120 or AT5G66220 or AT5G05270 or AT1G53520	Flavonoid biosynthesis/Biosynthesis of phenylpropanoids
isoliquiritigenin_d <=> liquiritigenin_d	AT3G55120 or AT5G66220 or AT5G05270 or AT1G53520	Flavonoid biosynthesis/Biosynthesis of phenylpropanoids
H2O2_c + 2 L-ascorbate_c <=> 2 H2O_c + 2 monodehydroascorbate_c	AT3G09640 or AT1G07890 or AT4G35000	Ascorbate glutathione cycle
H2O2_m + 2 L-ascorbate_m <=> 2 H2O_m + 2 monodehydroascorbate_m	AT3G09640 or AT1G07890 or AT4G35000	Ascorbate glutathione cycle
H2O2_d + 2 L-ascorbate_d <=> 2 H2O_d + 2 monodehydroascorbate_d	AT3G09640 or AT1G07890 or AT4G35000	Ascorbate glutathione cycle
3 H+_m + L-ascorbate_m + O2_m -> 2 H2O_m + monodehydroascorbate_m	AT1G55570 or AT3G13400 or AT4G22010 or AT4G38420 or AT5G66920 or AT1G21850 or AT1G76160 or AT1G75790 or AT1G41830 or AT1G21860 or AT5G21100 or AT4G28090 or AT1G55560 or AT3G13390 or AT2G23630 or AT5G21105 or AT4G39830	Ascorbate glutathione cycle
3 H+_d + L-ascorbate_d + O2_d -> 2 H2O_d + monodehydroascorbate_d	AT1G55570 or AT3G13400 or AT4G22010 or AT4G38420 or AT5G66920 or AT1G21850 or AT1G76160 or AT1G75790 or AT1G41830 or AT1G21860 or AT5G21100 or AT4G28090 or AT1G55560 or AT3G13390 or AT2G23630 or AT5G21105 or AT4G39830	Ascorbate glutathione cycle
ATP_d + dimethylallyl-pyrophosphate_d -> isopentenyladenosine-5'-triphosphate_d + diphosphate_d	AT5G20040 or AT3G23630 or AT5G19040 or AT1G68460 or AT4G24650	Zeatin biosynthesis
dimethylallyl-pyrophosphate_d + ADP_d <=> isopentenyladenosine-5'-diphosphate_d + diphosphate_d	AT5G20040 or AT3G23630 or AT5G19040 or AT1G68460 or AT4G24650	Zeatin biosynthesis
S-adenosyl-L-methionine_m -> H+_m + 5'-methylthioadenosine_m + 1-aminocyclopropane-1-carboxylate_m	AT1G01480 or AT2G22810 or AT5G65800 or AT5G28360 or AT4G37770 or AT4G26200 or AT4G11280 or AT4G08040 or AT3G49700	Cysteine and methionine metabolism
AMP_d + dimethylallyl-pyrophosphate_d -> diphosphate_d + isopentenyladenosine-5'-monophosphate_d	AT1G25410 or AT5G20040 or AT5G19040 or AT3G19160 or AT3G23630 or AT1G68460 or AT3G63110	Zeatin biosynthesis
H+_r + H2O_r + FAD_r + isopentenyladenine_r <=> adenine_r + 3-methyl-2-butenal_r + FADH2_r	AT4G29740 or AT5G21482 or AT5G56970 or AT3G63440 or AT2G41510 or AT2G19500 or AT1G75450	Cytokinins degradation
H+_v + H2O_v + FAD_v + isopentenyladenine_v <=> adenine_v + 3-methyl-2-butenal_v + FADH2_v	AT4G29740 or AT5G21482 or AT5G56970 or AT3G63440 or AT2G41510 or AT2G19500 or AT1G75450	Cytokinins degradation
isopentenyl_adenosine_r + H2O_r + FAD_r <=> 3-methyl-2-butenal_r + adenosine_r + FADH2_r	AT4G29740 or AT5G21482 or AT5G56970 or AT3G63440 or AT2G41510 or AT2G19500 or AT1G75450	Cytokinins degradation
isopentenyl_adenosine_v + H2O_v + FAD_v <=> 3-methyl-2-butenal_v + adenosine_v + FADH2_v	AT4G29740 or AT5G21482 or AT5G56970 or AT3G63440 or AT2G41510 or AT2G19500 or AT1G75450	Cytokinins degradation
trans-zeatin_r + H+_r + H2O_r + FAD_r <=> adenine_r + FADH2_r + 3-methyl-4-trans-hydroxy-2-butenal_r	AT4G29740 or AT5G21482 or AT2G19500 or AT5G56970 or AT3G63440 or AT2G41510 or AT1G75450	Cytokinins degradation
trans-zeatin_v + H+_v + H2O_v + FAD_v <=> adenine_v + FADH2_v + 3-methyl-4-trans-hydroxy-2-butenal_v	AT4G29740 or AT5G21482 or AT2G19500 or AT5G56970 or AT3G63440 or AT2G41510 or AT1G75450	Cytokinins degradation
H2O_r + trans-zeatin_riboside_r + FAD_r <=> adenosine_r + FADH2_r + 3-methyl-4-trans-hydroxy-2-butenal_r	AT4G29740 or AT5G21482 or AT5G56970 or AT3G63440 or AT2G41510 or AT2G19500 or AT1G75450	Cytokinins degradation
H2O_v + trans-zeatin_riboside_v + FAD_v <=> adenosine_v + FADH2_v + 3-methyl-4-trans-hydroxy-2-butenal_v	AT4G29740 or AT5G21482 or AT5G56970 or AT3G63440 or AT2G41510 or AT2G19500 or AT1G75450	Cytokinins degradation
divinyl_protochlorophyllide_a_d + NADPH_d -> H+_d + divinylchlorophyllide_a_d + NADP+_d	AT5G54190 or AT4G27440	Porphyrin and chlorophyll metabolism
CDP-choline_r + 1,2-diacylglycerol_r -> phosphatidylcholine_r + CMP_r	AT3G25585 or AT1G13560	Glycerophospholipid metabolism
H2O_c + NADP+_c -> 3 H+_c + phosphate_c + NAD+_c	AT3G20500 or AT5G24770 or AT3G52810 or AT2G18130 or AT3G46120 or AT4G13700 or AT2G16430 or AT4G36350 or AT1G56360 or AT5G34850 or AT5G24780 or AT2G27190 or AT1G52940	Nicotinate and nicotinamide metabolism
H2O_v + NADP+_v -> 3 H+_v + phosphate_v + NAD+_v	AT3G20500 or AT5G24770 or AT3G52810 or AT2G18130 or AT3G46120 or AT4G13700 or AT2G16430 or AT4G36350 or AT1G56360 or AT5G34850 or AT5G24780 or AT2G27190 or AT1G52940	Nicotinate and nicotinamide metabolism
coenzyme_A_m + 3-hydroxy-propionate_m <=> H2O_m + 3-hydroxypropionyl-CoA_m	AT1G06550 or AT3G24360 or AT4G31810 or AT4G13360 or AT5G65940 or AT3G60510	beta-Alanine metabolism/Propanoate metabolism
coenzyme_A_x + 3-hydroxy-propionate_x <=> H2O_x + 3-hydroxypropionyl-CoA_x	AT1G06550 or AT3G24360 or AT4G31810 or AT4G13360 or AT5G65940 or AT3G60510	beta-Alanine metabolism/Propanoate metabolism
2 H+_d + O2_d + 9'-cis-neoxanthin_d -> C25-allenic-apo-aldehyde_d + 2-cis,4-trans-xanthoxin_d	AT3G63520 or AT2G44990 or AT4G18350 or AT3G24220 or AT1G78390 or AT1G78390 or AT4G18350 or AT3G14440 or AT1G30100	Carotenoid biosynthesis
phytate_d + H2O_d -> 2 H+_d + phosphate_d + D-myo-inositol_(1,2,3,5,6)_pentakisphosphate_d	AT3G52820 or AT3G07130 or AT2G32770 or AT3G52780	Inositol phosphate metabolism
H+_c + 3,4-dihydroxyphenylpyruvate_c + NADPH_c <=> NADP+_c + R(+)-3,4-dihydroxyphenyllactate_c	AT1G12550 or AT1G79870	Tyrosine metabolism
H+_m + 3,4-dihydroxyphenylpyruvate_m + NADPH_m <=> NADP+_m + R(+)-3,4-dihydroxyphenyllactate_m	AT1G12550 or AT1G79870	Tyrosine metabolism
NAD+_c + D-sorbitol_c <=> NADH_c + H+_c + D-fructose_c	AT5G51970	Fructose and mannose metabolism
hypoxanthine_x + NAD+_x + H2O_x -> NADH_x + H+_x + xanthine_x	AT4G34900 or AT4G34890 or AT1G02590 or AT3G04390	Purine metabolism
ATP_c + dCMP_c <=> dCDP_c + ADP_c	AT4G25280 or AT3G60961 or AT3G60180 or AT5G26667	Pyrimidine metabolism
ATP_c + coenzyme_A_c + acetate_c <=> 2 H+_c + phosphate_c + ADP_c + acetyl-CoA_c	AT1G55320 or AT5G23050	Glycolysis / Gluconeogenesis/Pyruvate metabolism
ATP_x + coenzyme_A_x + acetate_x <=> 2 H+_x + phosphate_x + ADP_x + acetyl-CoA_x	AT1G55320 or AT5G23050	Glycolysis / Gluconeogenesis/Pyruvate metabolism
ATP_c + H+_c + coenzyme_A_c + acetate_c <=> AMP_c + acetyl-CoA_c + diphosphate_c	AT1G55320 or AT5G23050 or AT3G16910 or AT5G36880	Glycolysis / Gluconeogenesis/Reductive carboxylate cycle (CO2 fixation)
ATP_d + H+_d + coenzyme_A_d + acetate_d <=> AMP_d + acetyl-CoA_d + diphosphate_d	AT1G55320 or AT5G23050 or AT3G16910 or AT5G36880	Glycolysis / Gluconeogenesis/Reductive carboxylate cycle (CO2 fixation)
ATP_x + H+_x + coenzyme_A_x + acetate_x <=> AMP_x + acetyl-CoA_x + diphosphate_x	AT1G55320 or AT5G23050 or AT3G16910 or AT5G36880	Glycolysis / Gluconeogenesis/Reductive carboxylate cycle (CO2 fixation)
H2O_c + PROTEIN_C-TERMINAL_S-FARNESYL-L-CYSTEINE_METHYL_ESTER_c <=> methanol_c + PROTEIN_C-TERMINAL_S-FARNESYL-L-CYSTEINE_c	AT5G15860	-
H2O_r + PROTEIN_C-TERMINAL_S-FARNESYL-L-CYSTEINE_METHYL_ESTER_r <=> methanol_r + PROTEIN_C-TERMINAL_S-FARNESYL-L-CYSTEINE_r	AT5G15860	-
ATP_c + HCO3-_c + acetyl-CoA_c -> 2 H+_c + phosphate_c + malonyl-CoA_c + ADP_c	AT1G36180 or ( AT5G16390 and AT5G35360 and AT2G38040 and ATCG00500 ) or AT1G36160	Tetracycline biosynthesis/Pyruvate metabolism/Propanoate metabolism
ATP_d + HCO3-_d + acetyl-CoA_d -> 2 H+_d + phosphate_d + malonyl-CoA_d + ADP_d	AT1G36180 or ( AT5G16390 and AT5G35360 and AT2G38040 and ATCG00500 ) or AT1G36160	Tetracycline biosynthesis/Pyruvate metabolism/Propanoate metabolism
NADH_d + H+_d + acetol_d <=> NAD+_d + L-1,2-propanediol_d	AT1G04420 or AT2G27680 or AT1G06690 or AT5G53580 or AT1G59960	-
O2_d + acetol_d + NADPH_d -> formaldehyde_d + H2O_d + NADP+_d + acetate_d	AT1G04420 or AT2G27680 or AT1G06690 or AT5G53580 or AT1G59960	-
H2O_c + D-myo-inositol_(1,3,4,5)-tetrakisphosphate_c -> 2 H+_c + phosphate_c + D-myo-inositol_(1,3,4)-trisphosphate_c	AT1G71710 or AT2G31830 or AT1G34120 or AT1G65580 or AT1G05630 or AT4G18010 or AT2G43900	Inositol phosphate metabolism/Phosphatidylinositol signaling system
L-arabitol_c + NADP+_c <=> H+_c + L-arabinose_c + NADPH_c	AT2G37760 or AT2G37790 or AT2G37770 or AT3G53880 or AT5G01670	Pentose and glucuronate interconversions
spermine_x + H2O_x + O2_x -> H2O2_x + 3-aminopropionaldehyde_x + spermidine_x	AT1G62830 or AT3G10390 or AT4G29720 or AT3G13682 or AT4G16310 or AT2G43020 or AT1G65840 or AT3G59050 or AT5G13700	-
H2O_c + GTP_c -> 3 H+_c + phosphate_c + GDP_c	AT3G47450 or AT4G13350 or AT3G63150 or AT2G26300 or AT5G64813 or AT3G19720 or AT4G34460 or AT5G20010 or AT5G20020 or AT3G51300 or AT3G48040 or AT5G55190 or AT1G02280 or AT5G42080 or AT4G35020 or AT4G33650 or AT4G17170 or AT3G60190 or AT3G54840 or AT3G61760 or AT2G14120 or AT2G44590 or AT1G60500 or AT1G14830 or AT1G75840 or AT5G24770	Purine metabolism
H2O_m + GTP_m -> 3 H+_m + phosphate_m + GDP_m	AT3G47450 or AT4G13350 or AT3G63150 or AT2G26300 or AT5G64813 or AT3G19720 or AT4G34460 or AT5G20010 or AT5G20020 or AT3G51300 or AT3G48040 or AT5G55190 or AT1G02280 or AT5G42080 or AT4G35020 or AT4G33650 or AT4G17170 or AT3G60190 or AT3G54840 or AT3G61760 or AT2G14120 or AT2G44590 or AT1G60500 or AT1G14830 or AT1G75840 or AT5G24770	Purine metabolism
H2O_d + GTP_d -> 3 H+_d + phosphate_d + GDP_d	AT3G47450 or AT4G13350 or AT3G63150 or AT2G26300 or AT5G64813 or AT3G19720 or AT4G34460 or AT5G20010 or AT5G20020 or AT3G51300 or AT3G48040 or AT5G55190 or AT1G02280 or AT5G42080 or AT4G35020 or AT4G33650 or AT4G17170 or AT3G60190 or AT3G54840 or AT3G61760 or AT2G14120 or AT2G44590 or AT1G60500 or AT1G14830 or AT1G75840 or AT5G24770	Purine metabolism
H2O_r + GTP_r -> 3 H+_r + phosphate_r + GDP_r	AT3G47450 or AT4G13350 or AT3G63150 or AT2G26300 or AT5G64813 or AT3G19720 or AT4G34460 or AT5G20010 or AT5G20020 or AT3G51300 or AT3G48040 or AT5G55190 or AT1G02280 or AT5G42080 or AT4G35020 or AT4G33650 or AT4G17170 or AT3G60190 or AT3G54840 or AT3G61760 or AT2G14120 or AT2G44590 or AT1G60500 or AT1G14830 or AT1G75840 or AT5G24770	Purine metabolism
H2O_v + GTP_v -> 3 H+_v + phosphate_v + GDP_v	AT3G47450 or AT4G13350 or AT3G63150 or AT2G26300 or AT5G64813 or AT3G19720 or AT4G34460 or AT5G20010 or AT5G20020 or AT3G51300 or AT3G48040 or AT5G55190 or AT1G02280 or AT5G42080 or AT4G35020 or AT4G33650 or AT4G17170 or AT3G60190 or AT3G54840 or AT3G61760 or AT2G14120 or AT2G44590 or AT1G60500 or AT1G14830 or AT1G75840 or AT5G24770	Purine metabolism
H2O_c + ADP-ribose_c -> AMP_c + D-ribose-5-phosphate_c	AT2G04430 or AT5G47240 or AT2G04440 or AT4G25434 or AT2G04450 or AT5G47650 or AT4G12720	Purine metabolism
H+_d + methylglyoxal_d + NADPH_d -> NADP+_d + acetol_d	AT1G04420 or AT2G27680 or AT1G06690 or AT5G53580 or AT1G59960	Glycine, serine and threonine metabolism
CO2_c + H2O_c <=> H+_c + HCO3-_c	AT1G70410 or AT1G19580 or AT3G52720 or AT5G56330 or AT1G47260 or AT5G14740 or AT1G23730 or AT1G58180 or AT3G01500 or AT5G66510 or AT4G33580	Cyanate degradation
CO2_m + H2O_m <=> H+_m + HCO3-_m	AT1G70410 or AT1G19580 or AT3G52720 or AT5G56330 or AT1G47260 or AT5G14740 or AT1G23730 or AT1G58180 or AT3G01500 or AT5G66510 or AT4G33580	Cyanate degradation
CO2_d + H2O_d <=> H+_d + HCO3-_d	AT1G70410 or AT1G19580 or AT3G52720 or AT5G56330 or AT1G47260 or AT5G14740 or AT1G23730 or AT1G58180 or AT3G01500 or AT5G66510 or AT4G33580	Cyanate degradation
NAD+_g + xanthine_g + H2O_g -> NADH_g + 2 H+_g + urate_g	AT1G02590 or AT3G04390 or AT4G34890 or AT4G34900	Purine metabolism
NAD+_m + xanthine_m + H2O_m -> NADH_m + 2 H+_m + urate_m	AT1G02590 or AT3G04390 or AT4G34890 or AT4G34900	Purine metabolism
NAD+_v + xanthine_v + H2O_v -> NADH_v + 2 H+_v + urate_v	AT1G02590 or AT3G04390 or AT4G34890 or AT4G34900	Purine metabolism
NAD+_x + xanthine_x + H2O_x -> NADH_x + 2 H+_x + urate_x	AT1G02590 or AT3G04390 or AT4G34890 or AT4G34900	Purine metabolism
monovinyl_protochlorophyllide_a_d + H+_d + NADPH_d -> chlorophyllide_a_d + NADP+_d	AT5G54190 or AT4G27440 or AT1G03630	Porphyrin and chlorophyll metabolism
H+_d + divinyl_protochlorophyllide_a_d + NADPH_d -> monovinyl_protochlorophyllide_a_d + NADP+_d	AT5G18660	Porphyrin and chlorophyll metabolism
ATP_c + adenosine_c <=> AMP_c + ADP_c	AT1G19600 or AT4G27600 or AT3G09820 or AT5G03300	Purine metabolism
phosphatidyl-N-dimethylethanolamine_r + S-adenosyl-L-methionine_r <=> phosphatidylcholine_r + S-adenosyl-L-homocysteine_r	AT1G80860	Glycerophospholipid metabolism
L-gulose-1-P_c + H2O_c -> 3 H+_c + phosphate_c + L-gulose_c	AT2G25870	Ascorbate biosynthesis II (L-gulose pathway)
H+_c + O2_c + squalene_c + NADPH_c -> (S)-2,3-Epoxysqualene_c + H2O_c + NADP+_c	AT1G58440 or AT5G24140 or AT2G22830 or AT4G37760 or AT5G24160 or AT5G24150	Steroid biosynthesis
4,4-dimethyl-5alpha-cholesta-8,24-dien-3-beta-ol_c + H+_c + O2_c + NADPH_c -> 4alpha-hydroxymethyl-4beta-methyl-5alpha-cholesta-8,24-dien-3beta-ol_c + H2O_c + NADP+_c	AT4G22753 or AT4G22756 or AT4G12110	cholesterol biosynthesis
4alpha-hydroxymethyl-4beta-methyl-5alpha-cholesta-8,24-dien-3beta-ol_c + H+_c + O2_c + NADPH_c -> 4alpha-formyl-4beta-methyl-5alpha-cholesta-8,24-dien-3beta-ol_c + 2 H2O_c + NADP+_c	AT4G22753 or AT4G22756 or AT4G12110	cholesterol biosynthesis
H+_c + 4alpha-formyl-4beta-methyl-5alpha-cholesta-8,24-dien-3beta-ol_c + O2_c + NADPH_c -> H2O_c + 4alpha-carboxy-4beta-methyl-5alpha-cholesta-8,24-dien-3beta-ol_c + NADP+_c	AT4G22753 or AT4G22756 or AT4G12110	cholesterol biosynthesis
4alpha-carboxy-4beta-methyl-5alpha-cholesta-8,24-dien-3beta-ol_c + NADP+_c -> CO2_c + H+_c + 4alpha-methyl-5alpha-cholesta-8,24-dien-3-one_c + NADPH_c	AT2G43420 or AT2G33630 or AT2G26260 or AT1G47290	cholesterol biosynthesis
coenzyme_A_m + methylmalonate-semialdehyde_m + NAD+_m + H2O_m -> propionyl-CoA_m + NADH_m + 2 H+_m + HCO3-_m	AT1G44170 or AT4G36250 or AT1G23800 or AT3G48000 or AT2G14170	Valine, leucine and Isoleucine degradation/Propanoate metabolism
coenzyme_A_r + methylmalonate-semialdehyde_r + NAD+_r + H2O_r -> propionyl-CoA_r + NADH_r + 2 H+_r + HCO3-_r	AT1G44170 or AT4G36250 or AT1G23800 or AT3G48000 or AT2G14170	Valine, leucine and Isoleucine degradation/Propanoate metabolism
coenzyme_A_v + methylmalonate-semialdehyde_v + NAD+_v + H2O_v -> propionyl-CoA_v + NADH_v + HCO3-_v + 2 H+_v	AT1G44170 or AT4G36250 or AT1G23800 or AT3G48000 or AT2G14170	Valine, leucine and Isoleucine degradation/Propanoate metabolism
indole-3-acetamide_c + H2O_c -> ammonia_c + indole-3-acetate_c	AT5G07360 or AT1G08980	Tryptophan metabolism
AMP_m + ATP_m <=> 2 ADP_m	AT5G60340 or AT2G39270 or AT3G01820 or AT5G35170 or AT5G47840 or AT5G63400 or AT5G50370 or AT2G37250	Purine metabolism
AMP_d + ATP_d <=> 2 ADP_d	AT5G60340 or AT2G39270 or AT3G01820 or AT5G35170 or AT5G47840 or AT5G63400 or AT5G50370 or AT2G37250	Purine metabolism
palmitoyl_CoA_r + L-serine_r -> CO2_r + coenzyme_A_r + 3-dehydrosphinganine_r	AT4G36480 or ( AT5G23670 and AT4G36480 ) or AT3G48790 or AT3G48780	Sphingolipid metabolism
sinapate_c + UDP-D-glucose_c -> 1-O-sinapoyl-beta-D-glucose_c + UDP_c	AT4G15490 or AT4G15480 or AT4G15500 or AT3G21560	Phenylpropanoid biosynthesis
ATP_v + sphinganine_v -> sphinganine_1-phosphate_v + ADP_v	AT5G51290 or AT4G21540	Sphingolipid metabolism
2 H+_c + 2 O2-_c <=> H2O2_c + O2_c	AT1G12520 or AT3G56350 or AT4G25100 or AT5G51100 or AT5G23310 or AT1G08830 or AT2G28190 or AT5G18100 or AT3G10920	Removal of superoxide radicals
2 H+_m + 2 O2-_m <=> H2O2_m + O2_m	AT1G12520 or AT3G56350 or AT4G25100 or AT5G51100 or AT5G23310 or AT1G08830 or AT2G28190 or AT5G18100 or AT3G10920	Removal of superoxide radicals
2 H+_d + 2 O2-_d <=> H2O2_d + O2_d	AT1G12520 or AT3G56350 or AT4G25100 or AT5G51100 or AT5G23310 or AT1G08830 or AT2G28190 or AT5G18100 or AT3G10920	Removal of superoxide radicals
2 H+_v + 2 O2-_v <=> H2O2_v + O2_v	AT1G12520 or AT3G56350 or AT4G25100 or AT5G51100 or AT5G23310 or AT1G08830 or AT2G28190 or AT5G18100 or AT3G10920	Removal of superoxide radicals
2 H+_x + 2 O2-_x <=> H2O2_x + O2_x	AT1G12520 or AT3G56350 or AT4G25100 or AT5G51100 or AT5G23310 or AT1G08830 or AT2G28190 or AT5G18100 or AT3G10920	Removal of superoxide radicals
ATP_d + adenosine_5'-phosphosulfate_d <=> phosphoadenosine-5'-phosphosulfate_d + ADP_d	AT5G67520 or AT3G03900 or AT4G39940 or AT2G14750	Purine metabolism/Sulfur metabolism
ATP_c + thiamin_c -> AMP_c + thiamine_pyrophosphate_c	AT5G19470 or AT5G19460 or AT1G02880 or AT2G44750	Thiamine metabolism
ATP_d + thiamin_d -> AMP_d + thiamine_pyrophosphate_d	AT5G19470 or AT5G19460 or AT1G02880 or AT2G44750	Thiamine metabolism
H+_c + an_oxidized_thioredoxin_c + NADPH_c -> reduced_thioredoxin_c + NADP+_c	AT1G60420 or or AT4G35460 or AT2G17420	Pyrimidine metabolism
H+_m + an_oxidized_thioredoxin_m + NADPH_m -> reduced_thioredoxin_m + NADP+_m	AT1G60420 or or AT4G35460 or AT2G17420	Pyrimidine metabolism
H+_d + an_oxidized_thioredoxin_d + NADPH_d -> reduced_thioredoxin_d + NADP+_d	AT1G60420 or or AT4G35460 or AT2G17420	Pyrimidine metabolism
ATP_c + thymidine_c -> ADP_c + dTMP_c	AT1G72040 or AT5G23070 or AT3G07800	Pyrimidine metabolism
reduced_thioredoxin_c + ADP_c -> dADP_c + H2O_c + an_oxidized_thioredoxin_c	AT5G40942 or ( AT2G21790 and AT3G23580 ) or AT3G27060	Purine metabolism
H2O_m + trehalose_6-phosphate_m -> trehalose_m + 3 H+_m + phosphate_m	AT1G23870 or AT1G60140 or AT2G18700 or AT4G17770 or AT5G65140 or AT5G10100 or AT5G51460 or AT4G39770 or AT4G12430 or AT4G22590 or AT2G22190 or AT1G78090 or AT1G68020 or AT1G35910 or AT1G22210 or AT2G25870	Starch and sucrose metabolism
NAD+_c + glycerate_c <=> NADH_c + tartronate_semialdehyde_c + H+_c	AT4G20930 or AT1G71180 or AT1G71170	Glyoxylate and dicarboxylate metabolism
glycerate_c + NADP+_c <=> tartronate_semialdehyde_c + H+_c + NADPH_c	AT4G20930 or AT1G71180 or AT1G71170	Glyoxylate and dicarboxylate metabolism
UDP-N-acetyl-D-glucosamine_c -> UDP-N-acetyl-D-galactosamine_c	AT1G12780 or AT1G63180 or AT4G10960 or AT4G23920	Amino sugar and nucleotide sugar metabolism
UDP-D-glucose_c <=> UDP-galactose_c	AT1G63180 or AT4G23920 or AT4G10960 or AT1G12780 or AT1G64440	Galactose metabolism/Amino sugar and nucleotide sugar metabolism
UDP-D-glucose_g <=> UDP-galactose_g	AT1G63180 or AT4G23920 or AT4G10960 or AT1G12780 or AT1G64440	Galactose metabolism/Amino sugar and nucleotide sugar metabolism
ATP_m + UDP_m <=> UTP_m + ADP_m	AT4G09320 or AT4G11010 or AT4G23900 or AT5G63310 or AT1G17410	Pyrimidine metabolism
ATP_d + UDP_d <=> UTP_d + ADP_d	AT4G09320 or AT4G11010 or AT4G23900 or AT5G63310 or AT1G17410	Pyrimidine metabolism
ATP_v + UDP_v <=> UTP_v + ADP_v	AT4G09320 or AT4G11010 or AT4G23900 or AT5G63310 or AT1G17410	Pyrimidine metabolism
reduced_thioredoxin_c + UDP_c -> H2O_c + dUDP_c + an_oxidized_thioredoxin_c	AT5G40942 or ( AT2G21790 and AT3G23580 ) or AT3G27060	Pyrimidine metabolism
2 NAD+_c + H2O_c + UDP-D-glucose_c <=> 2 NADH_c + 2 H+_c + UDP-D-glucuronate_c	AT4G22110 or AT1G22440 or AT1G77120 or AT5G42250 or AT1G32780 or AT1G22430 or AT5G24760 or AT1G64710 or AT5G39320 or AT5G15490 or AT3G29360 or AT1G26570	Pentose and glucuronate interconversions/Ascorbate and aldarate metabolism/Starch and sucrose metabolism/Amino sugar and nucleotide sugar metabolism
UMP_d + diphosphate_d <=> uracil_d + 5-phosphoribosyl_1-pyrophosphate_d	AT1G26190 or AT1G73980 or AT1G55810 or AT5G40870 or AT4G26510 or AT3G53900 or AT3G27440 or AT3G27190	Pyrimidine metabolism
ATP_d + uridine_d -> UMP_d + ADP_d	AT1G32060 or AT5G40870 or AT3G27440 or AT3G27190 or AT4G26510 or AT1G26190 or AT1G73980 or ( AT3G62410 and AT1G32060 and AT3G26650 ) or AT1G55810	Pyrimidine metabolism
GTP_d + uridine_d -> UMP_d + GDP_d	AT1G32060 or AT3G27440 or AT3G27190 or AT4G26510 or AT1G26190 or AT1G73980 or ( AT3G62410 and AT1G32060 and AT3G26650 ) or AT1G55810 or AT5G40870	Pyrimidine metabolism
ethanol_c + NAD+_c <=> NADH_c + H+_c + acetaldehyde_c	AT4G22110 or AT1G22440 or AT5G42250 or AT1G32780 or AT1G22430 or AT5G24760 or AT1G64710 or AT1G77120	Glycolysis / Gluconeogenesis
L-tryptophan_d -> CO2_d + tryptamine_d	AT2G20340	Tryptophan metabolism/Indole alkaloid biosynthesis/Biosynthesis of alkaloids derived from shikimate pathway
ATP_d + L-aspartate_d <=> L-aspartyl-4-phosphate_d + ADP_d	AT5G21060 or AT5G13280 or AT5G14060 or AT4G19710 or AT3G02020 or AT1G31230	Glycine, serine and threonine metabolism/Cysteine and methionine metabolism/Lysine biosynthesis/Biosynthesis of alkaloids derived from ornithine, lysine and nicotinic acid
NAD+_m + testosterone_m <=> NADH_m + H+_m + androst-4-ene-3,17-dione_m	AT3G26770 or AT3G26760 or AT2G47120 or AT1G49670 or AT3G29260	Steroid hormone biosynthesis
NAD+_x + testosterone_x <=> NADH_x + H+_x + androst-4-ene-3,17-dione_x	AT3G26770 or AT3G26760 or AT2G47120 or AT1G49670 or AT3G29260	Steroid hormone biosynthesis
lactose_c + H2O_c <=> beta-D-galactose_c + beta-D-glucose_c	AT5G63800 or AT4G38590 or AT2G04060 or AT1G72990	-
caffeoyl-CoA_r + S-adenosyl-L-methionine_r -> H+_r + feruloyl-CoA_r + S-adenosyl-L-homocysteine_r	AT4G26220 or AT3G62000 or AT1G24735 or AT4G34050 or AT1G67990 or AT1G67980	Phenylalanine metabolism/Phenylpropanoid biosynthesis/Flavonoid biosynthesis/Stilbenoid, diarylheptanoid and gingerol biosynthesis/Biosynthesis of phenylpropanoids/Biosynthesis of alkaloids derived from shikimate pathway
CO2_c + H2O_c <=> H2CO3_c	AT5G66510 or AT1G47260 or AT1G19580 or AT5G56330 or AT5G14740 or AT4G33580 or AT3G01500 or AT3G52720 or AT1G70410 or AT1G23730 or AT1G58180	Nitrogen metabolism
CO2_m + H2O_m <=> H2CO3_m	AT5G66510 or AT1G47260 or AT1G19580 or AT5G56330 or AT5G14740 or AT4G33580 or AT3G01500 or AT3G52720 or AT1G70410 or AT1G23730 or AT1G58180	Nitrogen metabolism
CO2_d + H2O_d <=> H2CO3_d	AT5G66510 or AT1G47260 or AT1G19580 or AT5G56330 or AT5G14740 or AT4G33580 or AT3G01500 or AT3G52720 or AT1G70410 or AT1G23730 or AT1G58180	Nitrogen metabolism
ATP_m + CDP_m <=> ADP_m + CTP_m	AT4G09320 or AT4G11010 or AT4G23900 or AT5G63310 or AT1G17410	Pyrimidine metabolism
ATP_d + CDP_d <=> ADP_d + CTP_d	AT4G09320 or AT4G11010 or AT4G23900 or AT5G63310 or AT1G17410	Pyrimidine metabolism
ATP_v + CDP_v <=> ADP_v + CTP_v	AT4G09320 or AT4G11010 or AT4G23900 or AT5G63310 or AT1G17410	Pyrimidine metabolism
CDP_c + reduced_thioredoxin_c -> dCDP_c + H2O_c + an_oxidized_thioredoxin_c	AT5G40942 or ( AT2G21790 and AT3G23580 ) or AT3G27060	Pyrimidine metabolism
UDP-D-glucose_c -> cellulose_c + UDP_c	AT5G16910 or AT5G09870 or AT4G39350 or AT4G38190 or AT4G24010 or AT4G24000 or AT4G23990 or AT4G15320 or AT4G15290 or AT3G03050 or AT2G33100 or AT2G32620 or AT2G32610 or AT2G32540 or AT2G32530 or AT2G25540 or AT2G21770 or AT1G55850 or AT1G32180 or AT1G02730	Starch and sucrose metabolism
UDP-D-glucose_g -> cellulose_g + UDP_g	AT5G16910 or AT5G09870 or AT4G39350 or AT4G38190 or AT4G24010 or AT4G24000 or AT4G23990 or AT4G15320 or AT4G15290 or AT3G03050 or AT2G33100 or AT2G32620 or AT2G32610 or AT2G32540 or AT2G32530 or AT2G25540 or AT2G21770 or AT1G55850 or AT1G32180 or AT1G02730	Starch and sucrose metabolism
UDP-D-glucose_r -> cellulose_r + UDP_r	AT5G16910 or AT5G09870 or AT4G39350 or AT4G38190 or AT4G24010 or AT4G24000 or AT4G23990 or AT4G15320 or AT4G15290 or AT3G03050 or AT2G33100 or AT2G32620 or AT2G32610 or AT2G32540 or AT2G32530 or AT2G25540 or AT2G21770 or AT1G55850 or AT1G32180 or AT1G02730	Starch and sucrose metabolism
ATP_c + CMP_c <=> CDP_c + ADP_c	AT4G25280 or AT3G60961 or AT3G60180 or AT5G26667	Pyrimidine metabolism
cystathionine_d + H2O_d -> ammonia_d + L-homocysteine_d + pyruvate_d	AT4G23600 or AT4G28410 or AT4G23590 or AT3G57050	Cysteine and methionine metabolism
deoxycytidine_c + H2O_c <=> ammonia_c + deoxyuridine_c	AT4G29580 or AT4G29570 or AT4G29650 or AT4G29640 or AT4G29630 or AT4G29620 or AT4G29610 or AT4G29600 or AT2G19570	Pyrimidine metabolism
cytidine_d + H2O_d -> ammonia_d + uridine_d	AT4G29650 or AT4G29640 or AT4G29630 or AT4G29620 or AT4G29610 or AT4G29600 or AT4G29580 or AT4G29570 or AT2G19570	Pyrimidine metabolism
NADH_m + 2 ferricytochrome_b5_m -> H+_m + NAD+_m + 2 ferrocytochrome_b5_m	AT5G17770 or AT5G20080	Amino sugar and nucleotide sugar metabolism
NADH_r + 2 ferricytochrome_b5_r -> H+_r + NAD+_r + 2 ferrocytochrome_b5_r	AT5G17770 or AT5G20080	Amino sugar and nucleotide sugar metabolism
4 reduced_cytochrome_c_m + 4 H+_m + O2_m -> 4 oxidized_cytochrome_c_m + 2 H2O_m	AT2G44520 or ATMG01280 or ( AT4G37830 and AT2G47380 and AT1G80230 and AT3G15640 and ATMG00730 and ATMG00160 and ATMG01360 ) or AT5G57815 or AT4G28060 or AT2G07687 or AT1G22450	Aerobic respiration
NAD+_d + D-lactaldehyde_d <=> NADH_d + H+_d + methylglyoxal_d	AT1G04420 or AT2G27680 or AT1G06690 or AT5G53580 or AT1G59960	Pyruvate metabolism
ATP_m + dADP_m <=> ADP_m + dATP_m	AT1G17410 or AT5G63310 or AT4G23900 or AT4G11010 or AT4G09320	Purine metabolism
ATP_d + dADP_d <=> ADP_d + dATP_d	AT1G17410 or AT5G63310 or AT4G23900 or AT4G11010 or AT4G09320	Purine metabolism
ATP_v + dADP_v <=> ADP_v + dATP_v	AT1G17410 or AT5G63310 or AT4G23900 or AT4G11010 or AT4G09320	Purine metabolism
dCDP_m + ATP_m <=> dCTP_m + ADP_m	AT1G17410 or AT5G63310 or AT4G23900 or AT4G11010 or AT4G09320	Pyrimidine metabolism
dCDP_d + ATP_d <=> dCTP_d + ADP_d	AT1G17410 or AT5G63310 or AT4G23900 or AT4G11010 or AT4G09320	Pyrimidine metabolism
dCDP_v + ATP_v <=> dCTP_v + ADP_v	AT1G17410 or AT5G63310 or AT4G23900 or AT4G11010 or AT4G09320	Pyrimidine metabolism
ATP_m + dGDP_m <=> ADP_m + dGTP_m	AT1G17410 or AT5G63310 or AT4G23900 or AT4G11010 or AT4G09320	Purine metabolism
ATP_d + dGDP_d <=> ADP_d + dGTP_d	AT1G17410 or AT5G63310 or AT4G23900 or AT4G11010 or AT4G09320	Purine metabolism
ATP_v + dGDP_v <=> ADP_v + dGTP_v	AT1G17410 or AT5G63310 or AT4G23900 or AT4G11010 or AT4G09320	Purine metabolism
ATP_c + 1,2-diacylglycerol_c <=> an_L-phosphatidate_c + ADP_c	AT5G63770 or AT5G57690 or AT4G30340 or AT4G28130 or AT2G20900 or AT2G18730	Glycerolipid metabolism/Glycerophospholipid metabolism/Phosphatidylinositol signaling system
ATP_d + 1,2-diacylglycerol_d <=> an_L-phosphatidate_d + ADP_d	AT5G63770 or AT5G57690 or AT4G30340 or AT4G28130 or AT2G20900 or AT2G18730	Glycerolipid metabolism/Glycerophospholipid metabolism/Phosphatidylinositol signaling system
H+_c + dihydrokaempferol_c + NADPH_c -> leucopelargonidin_c + NADP+_c	AT4G27250 or AT5G42800	Flavonoid biosynthesis
D-serine_c <=> ammonia_c + pyruvate_c	AT4G11640 or AT1G77420 or AT5G16120 or AT2G39400 or AT1G11090 or AT1G73480 or AT2G47630 or AT5G11650 or AT3G50790 or AT1G18360	Glycine, serine and threonine metabolism
D-serine_d <=> ammonia_d + pyruvate_d	AT4G11640 or AT1G77420 or AT5G16120 or AT2G39400 or AT1G11090 or AT1G73480 or AT2G47630 or AT5G11650 or AT3G50790 or AT1G18360	Glycine, serine and threonine metabolism
ATP_m + dTDP_m <=> dTTP_m + ADP_m	AT1G17410 or AT5G63310 or AT4G23900 or AT4G11010 or AT4G09320	Pyrimidine metabolism
ATP_d + dTDP_d <=> dTTP_d + ADP_d	AT1G17410 or AT5G63310 or AT4G23900 or AT4G11010 or AT4G09320	Pyrimidine metabolism
ATP_v + dTDP_v <=> dTTP_v + ADP_v	AT1G17410 or AT5G63310 or AT4G23900 or AT4G11010 or AT4G09320	Pyrimidine metabolism
ATP_c + dTMP_c <=> ADP_c + dTDP_c	AT5G59440	Pyrimidine metabolism
ATP_m + dTMP_m <=> ADP_m + dTDP_m	AT5G59440	Pyrimidine metabolism
ATP_m + dUDP_m <=> ADP_m + dUTP_m	AT1G17410 or AT5G63310 or AT4G23900 or AT4G11010 or AT4G09320	Pyrimidine metabolism
ATP_d + dUDP_d <=> ADP_d + dUTP_d	AT1G17410 or AT5G63310 or AT4G23900 or AT4G11010 or AT4G09320	Pyrimidine metabolism
ATP_v + dUDP_v <=> ADP_v + dUTP_v	AT1G17410 or AT5G63310 or AT4G23900 or AT4G11010 or AT4G09320	Pyrimidine metabolism
H2O_c + dUTP_c -> dUMP_c + diphosphate_c	AT3G46940	Pyrimidine metabolism
H2O_m + dUTP_m -> dUMP_m + diphosphate_m	AT3G46940	Pyrimidine metabolism
H2O_v + dUTP_v -> dUMP_v + diphosphate_v	AT3G46940	Pyrimidine metabolism
estradiol-17beta_m + NAD+_m <=> NADH_m + H+_m + estrone_m	AT3G26770 or AT3G26760 or AT2G47120 or AT1G59950 or AT5G62420 or AT5G19200 or AT3G50560 or AT1G49670 or AT3G29260 or AT3G06060	Steroid hormone biosynthesis
estradiol-17beta_x + NAD+_x <=> NADH_x + H+_x + estrone_x	AT3G26770 or AT3G26760 or AT2G47120 or AT1G59950 or AT5G62420 or AT5G19200 or AT3G50560 or AT1G49670 or AT3G29260 or AT3G06060	Steroid hormone biosynthesis
2 glutathione_m + L-dehydro-ascorbate_m <=> L-ascorbate_m + glutathione_disulfide_m	AT5G16710 or AT1G19570 or AT1G19550 or AT1G75270	Ascorbate and aldarate metabolism/Glutathione metabolism
2 glutathione_d + L-dehydro-ascorbate_d <=> L-ascorbate_d + glutathione_disulfide_d	AT5G16710 or AT1G19570 or AT1G19550 or AT1G75270	Ascorbate and aldarate metabolism/Glutathione metabolism
estradiol-17beta_m + NADP+_m <=> H+_m + estrone_m + NADPH_m	AT3G26770 or AT3G26760 or AT2G47120 or AT1G59950 or AT5G62420 or AT5G19200 or AT3G50560 or AT1G49670 or AT3G29260 or AT3G06060	Steroid hormone biosynthesis
estradiol-17beta_x + NADP+_x <=> H+_x + estrone_x + NADPH_x	AT3G26770 or AT3G26760 or AT2G47120 or AT1G59950 or AT5G62420 or AT5G19200 or AT3G50560 or AT1G49670 or AT3G29260 or AT3G06060	Steroid hormone biosynthesis
ATP_m + FMN_m -> diphosphate_m + FAD_m	AT5G57440 or AT4G25840 or AT4G11570 or AT3G48420 or AT4G21470 or AT2G38740 or AT4G39970 or AT1G56500	Riboflavin metabolism
trans,_trans-farnesyl_diphosphate_m + isopentenyl_diphosphate_m -> diphosphate_m + geranylgeranyl_diphosphate_m	AT3G14530 or AT5G40280 or AT3G59380 or AT3G14550 or AT3G32040 or AT3G20160 or AT3G29430 or AT1G49530 or AT1G78510 or AT1G17050 or AT2G23800 or AT2G18640 or AT2G18620 or AT4G36810	Terpenoid backbone biosynthesis/Biosynthesis of terpenoids and steroids/Biosynthesis of alkaloids derived from terpenoid and polyketide
isopentenyl_diphosphate_d + trans,_trans-farnesyl_diphosphate_d -> diphosphate_d + geranylgeranyl_diphosphate_d	AT3G14530 or AT5G40280 or AT3G59380 or AT3G14550 or AT3G32040 or AT3G20160 or AT3G29430 or AT1G49530 or AT1G78510 or AT1G17050 or AT2G23800 or AT2G18640 or AT2G18620 or AT4G36810	Terpenoid backbone biosynthesis/Biosynthesis of terpenoids and steroids/Biosynthesis of alkaloids derived from terpenoid and polyketide
isopentenyl_diphosphate_r + trans,_trans-farnesyl_diphosphate_r -> diphosphate_r + geranylgeranyl_diphosphate_r	AT3G14530 or AT5G40280 or AT3G59380 or AT3G14550 or AT3G32040 or AT3G20160 or AT3G29430 or AT1G49530 or AT1G78510 or AT1G17050 or AT2G23800 or AT2G18640 or AT2G18620 or AT4G36810	Terpenoid backbone biosynthesis/Biosynthesis of terpenoids and steroids/Biosynthesis of alkaloids derived from terpenoid and polyketide
NADH_c + 2 Fe3+_c <=> 2 Fe2+_c + H+_c + NAD+_c	AT4G25570 or AT5G38630 or AT1G26100 or AT5G49740 or AT5G50160 or AT1G01580 or AT5G23990 or AT5G23980 or AT1G23020 or AT1G01590	Fe(III)-reduction and Fe(II) transport
NADH_m + 2 Fe3+_m <=> 2 Fe2+_m + H+_m + NAD+_m	AT4G25570 or AT5G38630 or AT1G26100 or AT5G49740 or AT5G50160 or AT1G01580 or AT5G23990 or AT5G23980 or AT1G23020 or AT1G01590	Fe(III)-reduction and Fe(II) transport
NADH_d + 2 Fe3+_d <=> 2 Fe2+_d + H+_d + NAD+_d	AT4G25570 or AT5G38630 or AT1G26100 or AT5G49740 or AT5G50160 or AT1G01580 or AT5G23990 or AT5G23980 or AT1G23020 or AT1G01590	Fe(III)-reduction and Fe(II) transport
NADH_v + 2 Fe3+_v <=> 2 Fe2+_v + H+_v + NAD+_v	AT4G25570 or AT5G38630 or AT1G26100 or AT5G49740 or AT5G50160 or AT1G01580 or AT5G23990 or AT5G23980 or AT1G23020 or AT1G01590	Fe(III)-reduction and Fe(II) transport
formamide_c + H2O_c -> ammonia_c + formate_c	AT4G37550 or AT4G37560	Glyoxylate and dicarboxylate metabolism/Nitrogen metabolism
formamide_d + H2O_d -> ammonia_d + formate_d	AT4G37550 or AT4G37560	Glyoxylate and dicarboxylate metabolism/Nitrogen metabolism
ATP_c + D-fructose_c -> ADP_c + D-fructose-6-phosphate_c	AT3G54090 or AT3G59480 or AT1G66430 or AT5G51830 or AT1G06030 or AT1G06020 or AT1G06730 or AT2G31390 or AT1G69200 or AT4G10260 or AT4G37840 or AT3G20040 or AT1G50460 or AT1G47840 or AT2G19860 or AT4G29130	Sucrose degradation/Sucrose degradation to ethanol and lactate (anaerobic)
ATP_m + D-fructose_m -> ADP_m + D-fructose-6-phosphate_m	AT3G54090 or AT3G59480 or AT1G66430 or AT5G51830 or AT1G06030 or AT1G06020 or AT1G06730 or AT2G31390 or AT1G69200 or AT4G10260 or AT4G37840 or AT3G20040 or AT1G50460 or AT1G47840 or AT2G19860 or AT4G29130	Sucrose degradation/Sucrose degradation to ethanol and lactate (anaerobic)
ATP_d + D-fructose_d -> ADP_d + D-fructose-6-phosphate_d	AT3G54090 or AT3G59480 or AT1G66430 or AT5G51830 or AT1G06030 or AT1G06020 or AT1G06730 or AT2G31390 or AT1G69200 or AT4G10260 or AT4G37840 or AT3G20040 or AT1G50460 or AT1G47840 or AT2G19860 or AT4G29130	Sucrose degradation/Sucrose degradation to ethanol and lactate (anaerobic)
N10-formyl-THF_m + 5-phospho-ribosyl-glycineamide_m -> 5'-phosphoribosyl-N-formylglycineamide_m + tetrahydrofolate_m	AT1G66520 or AT5G47435 or AT4G17360 or AT1G31220	Purine metabolism/One carbon pool by folate
N10-formyl-THF_d + 5-phospho-ribosyl-glycineamide_d -> 5'-phosphoribosyl-N-formylglycineamide_d + tetrahydrofolate_d	AT1G66520 or AT5G47435 or AT4G17360 or AT1G31220	Purine metabolism/One carbon pool by folate
ammonia_m + NADH_m + CO2_m + H+_m + 5,10-methylene-THF_m -> glycine_m + NAD+_m + tetrahydrofolate_m	AT2G35120	Nitrogen metabolism
ATP_m + GDP_m <=> ADP_m + GTP_m	AT4G09320 or AT4G11010 or AT4G23900 or AT5G63310 or AT1G17410	Purine metabolism
ATP_d + GDP_d <=> ADP_d + GTP_d	AT4G09320 or AT4G11010 or AT4G23900 or AT5G63310 or AT1G17410	Purine metabolism
ATP_v + GDP_v <=> ADP_v + GTP_v	AT4G09320 or AT4G11010 or AT4G23900 or AT5G63310 or AT1G17410	Purine metabolism
GDP_c + reduced_thioredoxin_c -> H2O_c + an_oxidized_thioredoxin_c + dGDP_c	AT5G40942 or ( AT2G21790 and AT3G23580 ) or AT3G27060	Purine metabolism
palmitaldehyde_c + NADP+_c <=> H+_c + 2-trans-Hexadecenal_c + NADPH_c	AT3G03080 or AT5G17000 or AT5G16980 or AT5G16960 or AT5G37940 or AT1G26320 or AT1G65560 or AT5G38000 or AT5G16990 or AT5G37980 or AT3G59845 or AT5G16970	-
NADP+_c + L-gulonate_c <=> H+_c + glucuronate_c + NADPH_c	AT2G37760 or AT2G37770 or AT3G53880 or AT5G01670	Pentose and glucuronate interconversions/Ascorbate and aldarate metabolism
NADP+_d + L-gulonate_d <=> H+_d + glucuronate_d + NADPH_d	AT2G37760 or AT2G37770 or AT3G53880 or AT5G01670	Pentose and glucuronate interconversions/Ascorbate and aldarate metabolism
L-glutamate_m + ATP_m + tRNAGlu_m -> AMP_m + diphosphate_m + L-glutamyl-tRNAGlu_m	AT5G64050 or AT5G26710	Porphyrin and chlorophyll metabolism/Aminoacyl-tRNA biosynthesis
L-glutamate_d + ATP_d + tRNAGlu_d -> AMP_d + diphosphate_d + L-glutamyl-tRNAGlu_d	AT5G64050 or AT5G26710	Porphyrin and chlorophyll metabolism/Aminoacyl-tRNA biosynthesis
H2O2_m + 2 glutathione_m -> 2 H2O_m + glutathione_disulfide_m	AT2G30870 or AT5G17220 or AT3G03190 or AT2G30860 or AT4G11600 or AT4G31870 or AT2G43350 or AT2G31570 or AT2G25080	Glutathione metabolism
H2O2_d + 2 glutathione_d -> 2 H2O_d + glutathione_disulfide_d	AT2G30870 or AT5G17220 or AT3G03190 or AT2G30860 or AT4G11600 or AT4G31870 or AT2G43350 or AT2G31570 or AT2G25080	Glutathione metabolism
H2O2_x + 2 glutathione_x -> 2 H2O_x + glutathione_disulfide_x	AT2G30870 or AT5G17220 or AT3G03190 or AT2G30860 or AT4G11600 or AT4G31870 or AT2G43350 or AT2G31570 or AT2G25080	Glutathione metabolism
H+_m + glutathione_disulfide_m + NADPH_m -> 2 glutathione_m + NADP+_m	AT3G24170 or AT3G54660	Glutathione metabolism
H+_d + glutathione_disulfide_d + NADPH_d -> 2 glutathione_d + NADP+_d	AT3G24170 or AT3G54660	Glutathione metabolism
H+_x + glutathione_disulfide_x + NADPH_x -> 2 glutathione_x + NADP+_x	AT3G24170 or AT3G54660	Glutathione metabolism
L-glutamate_c -> CO2_c + 4-aminobutyrate_c	AT3G17720 or AT5G17330 or AT1G65960	Alanine, aspartate and glutamate metabolism/Butanoate metabolism
glycerol_c + NAD+_c <=> NADH_c + H+_c + dihydroxy-acetone_c	AT1G59960	Glycerolipid metabolism
ATP_c + dihydroxy-acetone_c -> ADP_c + dihydroxyacetone_phosphate_c	AT3G17770 or AT1G48430	Glycerolipid metabolism
ADP-D-glucose_d + 2 H+_d -> 1,4-alpha-D-glucan_d + ADP_d	AT4G18240 or AT1G11720 or AT5G65685	Starch and sucrose metabolism
S-lactoyl-glutathione_d <=> glutathione_d + methylglyoxal_d	AT3G60880 or AT2G45440 or AT1G11840 or AT1G08110 or AT1G67280	Pyruvate metabolism
H2O_d + S-lactoyl-glutathione_d -> glutathione_d + D-lactate_d	AT3G10850 or AT2G43430 or AT2G31350 or AT1G06130 or AT1G53580	Pyruvate metabolism
O2_m + homogentisate_m -> 4-maleyl-acetoacetate_m	AT5G54080	Tyrosine metabolism/Styrene degradation
O2_v + homogentisate_v -> 4-maleyl-acetoacetate_v	AT5G54080	Tyrosine metabolism/Styrene degradation
NAD+_d + homoserine_d <=> NADH_d + H+_d + L-aspartate-semialdehyde_d	AT5G21060 or AT4G19710 or AT1G31230	Glycine, serine and threonine metabolism/Cysteine and methionine metabolism/Lysine biosynthesis
homoserine_d + NADP+_d <=> H+_d + L-aspartate-semialdehyde_d + NADPH_d	AT5G21060 or AT4G19710 or AT1G31230	Glycine, serine and threonine metabolism/Cysteine and methionine metabolism/Lysine biosynthesis
phosphatidyl-N-methylethanolamine_r + S-adenosyl-L-methionine_r <=> phosphatidyl-N-dimethylethanolamine_r + H+_r + S-adenosyl-L-homocysteine_r	AT1G80860	Glycerophospholipid metabolism
2 NADH_r + 2 H+_r + malonyl-CoA_r + stearoyl-CoA_r <=> CO2_r + coenzyme_A_r + 2 NAD+_r + H2O_r + arachidoyl-CoA_r	AT5G04530 or AT3G52160 or AT1G71160 or AT5G49070 or AT2G26250 or AT1G07720 or AT2G28630 or AT1G04220 or AT1G25450 or AT5G43760 or AT4G34520 or AT1G01120 or AT1G68530	-
2 H+_r + malonyl-CoA_r + stearoyl-CoA_r + 2 NADPH_r <=> CO2_r + coenzyme_A_r + H2O_r + arachidoyl-CoA_r + 2 NADP+_r	AT5G04530 or AT3G52160 or AT1G71160 or AT5G49070 or AT2G26250 or AT1G07720 or AT2G28630 or AT1G04220 or AT1G25450 or AT5G43760 or AT4G34520 or AT1G01120 or AT1G68530	-
shikimate_c + coumaroyl-CoA_c -> coenzyme_A_c + 4-coumaroylshikimate_c	AT3G48720 or AT5G41040 or AT5G63560 or AT5G48930	Phenylpropanoid biosynthesis/Flavonoid biosynthesis/Stilbenoid, diarylheptanoid and gingerol biosynthesis/Biosynthesis of phenylpropanoids
shikimate_m + coumaroyl-CoA_m -> coenzyme_A_m + 4-coumaroylshikimate_m	AT3G48720 or AT5G41040 or AT5G63560 or AT5G48930	Phenylpropanoid biosynthesis/Flavonoid biosynthesis/Stilbenoid, diarylheptanoid and gingerol biosynthesis/Biosynthesis of phenylpropanoids
shikimate_r + coumaroyl-CoA_r -> coenzyme_A_r + 4-coumaroylshikimate_r	AT3G48720 or AT5G41040 or AT5G63560 or AT5G48930	Phenylpropanoid biosynthesis/Flavonoid biosynthesis/Stilbenoid, diarylheptanoid and gingerol biosynthesis/Biosynthesis of phenylpropanoids
isopentenyl_diphosphate_d <=> dimethylallyl-pyrophosphate_d	AT1G79690 or AT5G16440 or AT3G02780	Terpenoid backbone biosynthesis/Biosynthesis of terpenoids and steroids/Biosynthesis of alkaloids derived from terpenoid and polyketide
isocitrate_d -> glyoxylate_d + succinate_d	AT2G43180 or AT1G21440 or AT3G21720	Glyoxylate and dicarboxylate metabolism
isocitrate_x -> glyoxylate_x + succinate_x	AT2G43180 or AT1G21440 or AT3G21720	Glyoxylate and dicarboxylate metabolism
D-arabinose_5-phosphate_d + H2O_d + phosphoenolpyruvate_d -> 3 H+_d + phosphate_d + 3-deoxy-D-manno-octulosonate_8-P_d	AT5G22800 or AT1G16340 or AT1G79500	Lipopolysaccharide biosynthesis
ATP_c + L-arabinose_c -> ADP_c + beta-L-arabinose_1-phosphate_c	AT3G42850 or AT4G16130	Amino sugar and nucleotide sugar metabolism
2 L-ascorbate_m + O2_m -> 2 L-dehydro-ascorbate_m + 2 H2O_m	AT4G39830 or AT1G55570 or AT3G13400 or AT4G22010 or AT4G38420 or AT5G66920 or AT1G21850 or AT1G76160 or AT1G75790 or AT1G41830 or AT1G21860 or AT4G28090 or AT1G55560 or AT3G13390 or AT2G23630 or AT5G21105 or AT5G21100	Ascorbate and aldarate metabolism
2 L-ascorbate_d + O2_d -> 2 H2O_d + 2 L-dehydro-ascorbate_d	AT4G39830 or AT1G55570 or AT3G13400 or AT4G22010 or AT4G38420 or AT5G66920 or AT1G21850 or AT1G76160 or AT1G75790 or AT1G41830 or AT1G21860 or AT4G28090 or AT1G55560 or AT3G13390 or AT2G23630 or AT5G21105 or AT5G21100	Ascorbate and aldarate metabolism
H2O2_c + L-ascorbate_c -> L-dehydro-ascorbate_c + 2 H2O_c	AT3G09640 or AT1G07890	Ascorbate and aldarate metabolism/Glutathione metabolism
H2O2_m + L-ascorbate_m -> L-dehydro-ascorbate_m + 2 H2O_m	AT3G09640 or AT1G07890	Ascorbate and aldarate metabolism/Glutathione metabolism
H2O2_d + L-ascorbate_d -> 2 H2O_d + L-dehydro-ascorbate_d	AT3G09640 or AT1G07890	Ascorbate and aldarate metabolism/Glutathione metabolism
coniferyl_alcohol_c + UDP-D-glucose_c -> coniferin_c + UDP_c	AT2G18560 or AT2G18570 or AT4G36770 or AT3G50740 or AT5G66690 or AT5G26310	Phenylpropanoid biosynthesis
xylitol_x + NADP+_x <=> H+_x + L-xylulose_x + NADPH_x	AT1G62610 or AT2G17845 or AT3G01980 or AT3G55290 or AT3G46170 or AT1G63380 or AT3G55310	Pentose and glucuronate interconversions
malonyl-CoA_x -> CO2_x + acetyl-CoA_x	AT4G04320	beta-Alanine metabolism/Propanoate metabolism
mannitol-1-phosphate_c + NADP+_c <=> H+_c + D-mannose-6-phosphate_c + NADPH_c	AT2G21250 or AT2G21260	-
mannitol-1-phosphate_m + NADP+_m <=> H+_m + D-mannose-6-phosphate_m + NADPH_m	AT2G21250 or AT2G21260	-
mannitol-1-phosphate_v + NADP+_v <=> H+_v + D-mannose-6-phosphate_v + NADPH_v	AT2G21250 or AT2G21260	-
5,10-methenyl-THF_d + NADPH_d -> 5,10-methylene-THF_d + NADP+_d	AT2G12200 or AT2G12280	Glyoxylate and dicarboxylate metabolism/One carbon pool by folate
ATP_d + myo-inositol_d -> H+_d + ADP_d + D-myo-inositol_(3)-monophosphate_d	AT5G58730	Lipid-independent phytate biosynthesis
an_oxidized_hemoprotein_r + NADPH_r <=> H+_r + reduced_hemoprotein_r + NADP+_r	AT4G30210 or AT4G24520	-
H2O2_c + H+_c + NADPH_c <=> 2 H2O_c + NADP+_c	AT3G45810 or AT5G07390 or AT1G19230 or AT5G47910 or AT5G51060 or AT1G09090 or AT4G25090 or AT4G11230 or AT5G60010 or AT1G64060	-
H2O2_v + H+_v + NADPH_v <=> 2 H2O_v + NADP+_v	AT3G45810 or AT5G07390 or AT1G19230 or AT5G47910 or AT5G51060 or AT1G09090 or AT4G25090 or AT4G11230 or AT5G60010 or AT1G64060	-
palmitoyl_CoA_x + H2O_x -> coenzyme_A_x + palmitate_x	AT5G47330 or AT4G17483 or AT5G48370 or AT5G47350 or AT4G17480 or AT1G68890 or AT4G00520 or AT1G48320 or AT4G17470 or AT2G30720 or AT5G47340 or AT1G01710	Fatty acid elongation in mitochondria/Biosynthesis of unsaturated fatty acids
NAD+_m + 3-phosphoglycerate_m <=> NADH_m + H+_m + 3-phospho-hydroxypyruvate_m	AT1G72190 or AT1G68010 or AT1G17745 or AT3G19480	Glycine, serine and threonine metabolism
NAD+_d + 3-phosphoglycerate_d <=> NADH_d + H+_d + 3-phospho-hydroxypyruvate_d	AT1G72190 or AT1G68010 or AT1G17745 or AT3G19480	Glycine, serine and threonine metabolism
NAD+_x + 3-phosphoglycerate_x <=> NADH_x + H+_x + 3-phospho-hydroxypyruvate_x	AT1G72190 or AT1G68010 or AT1G17745 or AT3G19480	Glycine, serine and threonine metabolism
H2O_c + phosphatidylcholine_c -> an_L-phosphatidate_c + choline_c	AT1G52570 or AT1G55180 or AT3G05630 or AT4G00240 or AT4G11830 or AT4G11840 or AT5G25370 or AT3G15730 or AT2G42010 or AT4G11850 or AT4G35790 or AT3G16785	Glycerophospholipid metabolism
H2O_d + phosphatidylcholine_d -> an_L-phosphatidate_d + choline_d	AT1G52570 or AT1G55180 or AT3G05630 or AT4G00240 or AT4G11830 or AT4G11840 or AT5G25370 or AT3G15730 or AT2G42010 or AT4G11850 or AT4G35790 or AT3G16785	Glycerophospholipid metabolism
H2O_v + phosphatidylcholine_v -> an_L-phosphatidate_v + choline_v	AT1G52570 or AT1G55180 or AT3G05630 or AT4G00240 or AT4G11830 or AT4G11840 or AT5G25370 or AT3G15730 or AT2G42010 or AT4G11850 or AT4G35790 or AT3G16785	Glycerophospholipid metabolism
D-mannose-6-phosphate_d <=> alpha-D-mannose_1-phosphate_d	AT5G17530 or AT1G70820 or AT2G45790	Fructose and mannose metabolism/Amino sugar and nucleotide sugar metabolism
H2O_g + 1-phosphatidyl-1D-myo-inositol_4,5-bisphosphate_g -> 3 H+_g + phosphate_g + 1-phosphatidyl-1D-myo-inositol_4-phosphate_g	AT3G59770 or AT3G14205 or AT1G47510 or AT1G22620 or AT1G17340 or AT5G20840 or AT2G31830 or AT3G43220 or AT1G65580 or AT1G05630 or AT2G43900	Inositol phosphate metabolism/Phosphatidylinositol signaling system
H2O_c + phosphatidylcholine_c -> phosphoryl-choline_c + 1,2-diacylglycerol_c	AT3G48610 or AT3G03520 or AT1G07230 or AT2G26870 or AT3G03530 or AT3G03540 or AT4G38530	Glycerophospholipid metabolism
H2O_v + phosphatidylcholine_v -> phosphoryl-choline_v + 1,2-diacylglycerol_v	AT3G48610 or AT3G03520 or AT1G07230 or AT2G26870 or AT3G03530 or AT3G03540 or AT4G38530	Glycerophospholipid metabolism
ATP_c + coenzyme_A_c + propionate_c -> AMP_c + propionyl-CoA_c + diphosphate_c	AT1G55320	Beta-Alanine biosynthesis II
prostaglandin-H2_m -> (5Z,13E)-(15S)-11-alpha,15-dihydroxy-9-oxoprosta-5,13-dienoate_m	AT5G42150	Arachidonic acid metabolism
monovinyl_protochlorophyllide_a_d + H+_d + NADPH_d -> chlorophyllide_a_d + NADP+_d	AT5G54190 or AT1G03630 or AT4G27440	Porphyrin and chlorophyll metabolism
4 Fe2+_d + 4 H+_d + O2_d -> 2 H2O_d + 4 Fe3+_d	AT2G40300 or AT3G56090 or AT5G01600	Porphyrin and chlorophyll metabolism
H2O_d + 2-Oxoglutaramate_d -> ammonia_d + alpha-ketoglutarate_d	AT5G12040	Alanine, aspartate and glutamate metabolism
H2O_m + Acetyl_phosphate_m <=> 4 H+_m + phosphate_m + acetate_m	AT5G03370	Pyruvate metabolism
ATP_c + D-myo-inositol_(1,3,4)-trisphosphate_c -> D-myo-inositol_(1,3,4,6)-tetrakisphosphate_c + H+_c + ADP_c	AT4G33770 or AT5G16760	Inositol phosphate metabolism/Phosphatidylinositol signaling system
ATP_c + D-myo-inositol_(3,4,5,6)-tetrakisphosphate_c -> 5 H+_c + ADP_c + D-myo-inositol_(1,3,4,5,6)-pentakisphosphate_c	AT4G08170	Inositol phosphate metabolism
O2_c + L-phenylalanine_c -> CO2_c + H2O_c + 2-Phenylacetamide_c	AT1G05260 or AT1G14540 or AT1G14550 or AT1G24110 or AT1G30870 or AT1G34510 or AT1G44970 or AT1G48130 or AT1G49570 or AT1G68850 or AT1G71695 or AT2G18140 or AT2G18150 or AT2G18980 or AT2G22420 or AT2G24800 or AT2G34060 or AT2G37130 or AT2G38380 or AT2G38390 or AT2G39040 or AT2G41480 or AT2G43480 or AT3G01190 or AT3G03670 or AT3G17070 or AT3G21770 or AT3G28200 or AT3G49110 or AT3G49120 or AT3G49960…	Phenylalanine metabolism
O2_v + L-phenylalanine_v -> CO2_v + H2O_v + 2-Phenylacetamide_v	AT1G05260 or AT1G14540 or AT1G14550 or AT1G24110 or AT1G30870 or AT1G34510 or AT1G44970 or AT1G48130 or AT1G49570 or AT1G68850 or AT1G71695 or AT2G18140 or AT2G18150 or AT2G18980 or AT2G22420 or AT2G24800 or AT2G34060 or AT2G37130 or AT2G38380 or AT2G38390 or AT2G39040 or AT2G41480 or AT2G43480 or AT3G01190 or AT3G03670 or AT3G17070 or AT3G21770 or AT3G28200 or AT3G49110 or AT3G49120 or AT3G49960…	Phenylalanine metabolism
ATP_d + D-myo-inositol_(1,3,4)-trisphosphate_d -> H+_d + ADP_d + D-myo-inositol_(1,3,4,5)-tetrakisphosphate_d	AT4G33770 or AT5G16760	Inositol phosphate metabolism
H2O_v + L-1-glycero-3-phosphocholine_v -> sn-glycerol-3-phosphate_v + choline_v	AT1G74210 or AT5G08030	Glycerophospholipid metabolism
L-histidine_c -> CO2_c + 1H-Imidazole-4-ethanamine_c	AT2G20340 or AT1G43710	Histidine metabolism/Biosynthesis of alkaloids derived from histidine and purine
L-histidine_m -> CO2_m + 1H-Imidazole-4-ethanamine_m	AT2G20340 or AT1G43710	Histidine metabolism/Biosynthesis of alkaloids derived from histidine and purine
L-histidine_d -> CO2_d + 1H-Imidazole-4-ethanamine_d	AT2G20340 or AT1G43710	Histidine metabolism/Biosynthesis of alkaloids derived from histidine and purine
H+_m + trans-Hexadec-2-enoyl-CoA_m + NADPH_m -> palmitoyl_CoA_m + NADP+_m	AT3G45770	Fatty acid elongation in mitochondria
H+_d + trans-Hexadec-2-enoyl-CoA_d + NADPH_d -> palmitoyl_CoA_d + NADP+_d	AT3G45770	Fatty acid elongation in mitochondria
ATP_c + 1-phosphatidyl-1D-myo-inositol_4-phosphate_c -> ADP_c + 1-phosphatidyl-1D-myo-inositol_4,5-bisphosphate_c	ATCG00730 or AT1G75010 or ATMG00220 or AT1G21980 or AT1G01460 or AT3G07960 or AT1G10900 or AT1G60890 or AT1G77740 or AT2G41210 or AT2G26420 or AT3G09920 or AT3G56960 or AT4G01190	Inositol phosphate metabolism/Phosphatidylinositol signaling system
lactose_d + H2O_d -> beta-D-galactose_d + alpha-D-glucose_d	AT1G72990 or AT3G52840 or AT3G54440	Galactose metabolism
GTP_d + alpha-D-mannose_1-phosphate_d -> diphosphate_d + GDP-D-mannose_d	AT4G30570 or AT3G55590 or AT2G39770	Fructose and mannose metabolism/Amino sugar and nucleotide sugar metabolism
testosterone_x + NADP+_x <=> H+_x + androst-4-ene-3,17-dione_x + NADPH_x	AT1G54870 or AT2G47130 or AT3G51680 or AT3G12800 or AT3G05260	Steroid hormone biosynthesis
H+_m + trans-Oct-2-enoyl-CoA_m + NADPH_m -> octanoyl-CoA_m + NADP+_m	AT3G45770	Fatty acid elongation in mitochondria
H+_d + trans-Oct-2-enoyl-CoA_d + NADPH_d -> octanoyl-CoA_d + NADP+_d	AT3G45770	Fatty acid elongation in mitochondria
H+_m + 2-trans-dodecenoyl-CoA_m + NADPH_m -> NADP+_m + lauroyl-CoA_m	AT3G45770	Fatty acid elongation in mitochondria
H+_d + 2-trans-dodecenoyl-CoA_d + NADPH_d -> NADP+_d + lauroyl-CoA_d	AT3G45770	Fatty acid elongation in mitochondria
H+_m + trans-Tetradec-2-enoyl-CoA_m + NADPH_m -> myristoyl-CoA_m + NADP+_m	AT3G45770	Fatty acid elongation in mitochondria
H+_d + trans-Tetradec-2-enoyl-CoA_d + NADPH_d -> myristoyl-CoA_d + NADP+_d	AT3G45770	Fatty acid elongation in mitochondria
UDP-D-glucose_c + coumaryl-alcohol_c -> 4-Hydroxycinnamyl_alcohol_4-D-glucoside_c + UDP_c	AT3G50740 or AT5G26310 or AT5G66690	Phenylpropanoid biosynthesis
H+_m + trans-Dec-2-enoyl-CoA_m + NADPH_m -> decanoyl-CoA_m + NADP+_m	AT3G45770	Fatty acid elongation in mitochondria
H+_d + trans-Dec-2-enoyl-CoA_d + NADPH_d -> decanoyl-CoA_d + NADP+_d	AT3G45770	Fatty acid elongation in mitochondria
trans-Hex-2-enoyl-CoA_m + NADPH_m -> 3 H+_m + hexanoyl-CoA_m + NADP+_m	AT3G45770	Fatty acid elongation in mitochondria
trans-Hex-2-enoyl-CoA_d + NADPH_d -> 3 H+_d + hexanoyl-CoA_d + NADP+_d	AT3G45770	Fatty acid elongation in mitochondria
NAD+_c + 3-hydroxy-isobutyrate_c <=> NADH_c + H+_c + methylmalonate-semialdehyde_c	AT4G20930 or AT4G29120	Valine, leucine and Isoleucine degradation
NAD+_m + 3-hydroxy-isobutyrate_m <=> NADH_m + H+_m + methylmalonate-semialdehyde_m	AT4G20930 or AT4G29120	Valine, leucine and Isoleucine degradation
NADH_c + H+_c + Chloral_hydrate_c -> NAD+_c + H2O_c + trichloroethanol_c	AT1G22430 or AT1G22440 or AT1G32780 or AT1G64710 or AT1G77120 or AT4G22110 or AT5G42250 or AT5G43940	Metabolism of xenobiotics by cytochrome P450
NADH_x + H+_x + Chloral_hydrate_x -> NAD+_x + H2O_x + trichloroethanol_x	AT1G22430 or AT1G22440 or AT1G32780 or AT1G64710 or AT1G77120 or AT4G22110 or AT5G42250 or AT5G43940	Metabolism of xenobiotics by cytochrome P450
O-1-Alk-1-enyl-2-acyl-sn-glycero-3-phosphoethanolamine_c + H2O_c -> 1-Alkenyl-2-acylglycerol_c + phosphoryl-ethanolamine_c	AT1G07230 or AT2G26870 or AT3G03530	Ether lipid metabolism
3-hydroxy-isobutyryl-CoA_m + H2O_m -> coenzyme_A_m + 3-hydroxy-isobutyrate_m	AT4G13360 or AT3G60510 or AT5G65940 or AT4G31810 or AT3G24360 or AT1G06550	Valine, leucine and Isoleucine degradation
3-hydroxy-isobutyryl-CoA_x + H2O_x -> coenzyme_A_x + 3-hydroxy-isobutyrate_x	AT4G13360 or AT3G60510 or AT5G65940 or AT4G31810 or AT3G24360 or AT1G06550	Valine, leucine and Isoleucine degradation
O-1-Alk-1-enyl-2-acyl-sn-glycero-3-phosphoethanolamine_c + H2O_c -> 2-Acyl-1-(1-alkenyl)-sn-glycero-3-phosphate_c + ethanolamine_c	AT1G55180 or AT2G42010 or AT3G05630 or AT3G15730 or AT3G16785 or AT4G11840 or AT4G11850 or AT5G25370	Ether lipid metabolism
O-1-Alk-1-enyl-2-acyl-sn-glycero-3-phosphoethanolamine_d + H2O_d -> 2-Acyl-1-(1-alkenyl)-sn-glycero-3-phosphate_d + ethanolamine_d	AT1G55180 or AT2G42010 or AT3G05630 or AT3G15730 or AT3G16785 or AT4G11840 or AT4G11850 or AT5G25370	Ether lipid metabolism
O-1-Alk-1-enyl-2-acyl-sn-glycero-3-phosphoethanolamine_v + H2O_v -> 2-Acyl-1-(1-alkenyl)-sn-glycero-3-phosphate_v + ethanolamine_v	AT1G55180 or AT2G42010 or AT3G05630 or AT3G15730 or AT3G16785 or AT4G11840 or AT4G11850 or AT5G25370	Ether lipid metabolism
NAD+_d + 3-isopropylmalate_d <=> NADH_d + H+_d + 2-isopropyl-3-oxosuccinate_d	AT1G80555 or AT5G14200 or AT1G80560 or AT1G31180	Valine, leucine and Isoleucine biosynthesis/Biosynthesis of alkaloids derived from histidine and purine
S-adenosyl-L-methionine_c + S-adenosyl-L-homocysteine_d -> S-adenosyl-L-methionine_d + S-adenosyl-L-homocysteine_c	AT4G39460 or AT1G34065	Transport

## Sheet: AraGEM
Reaction	GPR	Subsystem
S_H2O_c[c] + S_Chitobiose_c[c] -> 2 S_N_45_Acetyl_45_D_45_glucosamine_c[c]	(((AT1G05590)) or ((AT3G55260)))	Aminosugars metabolism
S_CO2_p[d] + S_H2O_p[d] + S_D_45_Ribulose_32_1_44_5_45_bisphosphate_p[d] -> 2 S_3_45_Phospho_45_D_45_glycerate_p[d]	(((ARTHCP030)) or ((AT1G67090)) or ((AT5G38410)) or ((AT5G38420)) or ((AT5G38430)))	Carbon fixation
S_Maltose_p[d] + S_H2O_p[d] -> 2 S_alpha_45_D_45_Glucose_p[d]	(((AT3G45940)) or ((AT5G11720)) or ((AT5G63840)))	Starch and sucrose metabolism
S_H2O_c[c] + S_Maltose_c[c] -> 2 S_alpha_45_D_45_Glucose_c[c]	(((AT3G45940)) or ((AT5G11720)) or ((AT5G63840)))	Starch and sucrose metabolism
S_ATP_c[c] + S_H2O_c[c] -> S_ADP_c[c] + S_Orthophosphate_c[c]	(((AT4G29900)) or ((AT4G30110)) or ((AT4G30190)) or ((AT4G32530)) or ((AT4G37640)) or ((AT4G39080)) or ((AT5G08670)) or ((AT5G08680)) or ((AT5G08690)) or ((AT5G13450)) or ((AT5G44240)) or ((AT5G44790)) or ((AT5G47030)) or ((AT5G55290)) or ((AT5G57350)) or ((AT5G62670)) or ((AT1G17500)) or ((AT1G19910)) or ((AT1G26130)) or ((AT1G51650)) or ((AT1G54280)) or ((AT1G59820)) or ((AT1G63440)) or ((AT1G6…	Purine metabolism
S_H2O_c[c] -> S_L_45_Proline_c[c] + S_Peptide_c[c]	(((AT2G14260)) or ((AT2G24200)) or ((AT4G30910)))	Arginine and proline metabolism
S_2_45_Hydroxyethylenedicarboxylate_c[c] -> S_CO2_c[c] + S_Pyruvate_c[c]	(((AT4G09520)))	Pyruvate metabolism
S_H2O_c[c] -> S_D_45_Glucose_c[c] + S_1_44_3_45_beta_45_D_45_Glucan_c[c]	(((AT3G57260)))	Starch and sucrose metabolism
S_ATP_c[c] + S_GMP_c[c] <=> S_ADP_c[c] + S_GDP_c[c]	(((AT3G06200)))	Purine metabolism
S_Sucrose_c[c] + S_H2O_c[c] -> S_D_45_Glucose_c[c] + S_D_45_Fructose_c[c]	(((AT3G45940)) or ((AT5G11720)) or ((AT5G63840)))	Galactose metabolism
S_GDP_45_mannose_c[c] -> S_GDP_c[c] + S_Mannan_c[c]	(((AT1G05570)) or ((AT1G11880)) or ((AT1G14070)) or ((AT1G14080)) or ((AT1G16900)) or ((AT1G71220)) or ((AT1G71990)) or ((AT1G78800)) or ((AT2G03210)) or ((AT2G13680)) or ((AT2G15350)) or ((AT2G15370)) or ((AT2G40190)) or ((AT2G44660)) or ((AT3G02350)) or ((AT3G25140)) or ((AT5G01220)) or ((AT5G02410)) or ((AT5G14850)) or ((AT5G22130)) or ((AT5G38460)))	Fructose and mannose metabolism
S_GDP_45_mannose_c[c] -> S_GDP_c[c] + S_1_44_4_45_beta_45_D_45_Mannan_c[c]	(((AT1G05570)) or ((AT1G11880)) or ((AT1G14070)) or ((AT1G14080)) or ((AT1G16900)) or ((AT1G71220)) or ((AT1G71990)) or ((AT1G78800)) or ((AT2G03210)) or ((AT2G13680)) or ((AT2G15350)) or ((AT2G15370)) or ((AT2G40190)) or ((AT2G44660)) or ((AT3G02350)) or ((AT3G25140)) or ((AT5G01220)) or ((AT5G02410)) or ((AT5G14850)) or ((AT5G22130)) or ((AT5G38460)))	Fructose and mannose metabolism
S_H2O_c[c] + S_Cys_45_Gly_c[c] -> S_Glycine_c[c] + S_L_45_Cysteine_c[c]	(((AT2G24200)) or ((AT4G30910)) or ((AT4G30920)))	Glutathione metabolism
S_UDP_45_glucose_c[c] + S_Dolichyl_32_phosphate_c[c] <=> S_UDP_c[c] + S_Dolichyl_32_beta_45_D_45_glucosyl_32_phosphate_c[c]	(((AT2G39630)))	N-Glycan biosynthesis
S_H2O_c[c] + S_Melibiose_c[c] -> S_D_45_Glucose_c[c] + S_D_45_Galactose_c[c]	(((AT3G45940)) or ((AT3G56310)) or ((AT5G11720)) or ((AT5G63840)))	Galactose metabolism
S_S_45_Adenosyl_45_L_45_methionine_c[c] + S_L_45_Histidine_c[c] -> S_S_45_Adenosyl_45_L_45_homocysteine_c[c] + S_N_40_pi_41__45_Methyl_45_L_45_histidine_c[c]	(((AT1G50000)) or ((AT2G19670)) or ((AT2G47420)) or ((AT3G13180)) or ((AT3G20020)) or ((AT3G27180)) or ((AT4G16570)) or ((AT4G29510)) or ((AT5G57300)) or ((AT5G66360)))	Histidine metabolism
S_H2O_c[c] -> S_N_45_Acetyl_45_D_45_glucosamine_c[c] + S_Chitin_c[c]	(((AT3G12500)) or ((AT3G54420)) or ((AT5G24090)))	Aminosugars metabolism
S_Cyanohydrin_c[c] -> S_Aldehyde_c[c] + S_Cyanide_c[c]	(((AT1G73050)) or ((AT3G07990)))	Cyanoamino acid metabolism
S_3_45_Phospho_45_D_45_glycerate_c[c] + S_NAD_43__c[c] <=> S_H_43__c[c] + S_NADH_c[c] + S_3_45_Phosphonooxypyruvate_c[c]	(((AT1G17745)) or ((AT3G19480)) or ((AT4G34200)))	Glycine, serine and threonine metabolism
S_2_45_Phospho_45_D_45_glycerate_c[c] <=> S_3_45_Phospho_45_D_45_glycerate_c[c]	(((AT1G09780)) or ((AT3G08590)) or ((AT3G50520)))	Glycolysis / Gluconeogenesis
S_2_45_Phospho_45_D_45_glycerate_p[d] <=> S_3_45_Phospho_45_D_45_glycerate_p[d]	(((AT1G09780)) or ((AT3G08590)) or ((AT3G50520)))	Glycolysis / Gluconeogenesis
S_Acetyl_45_CoA_c[c] <=> S_CoA_c[c] + S_Acetyl_45__91_acyl_45_carrier_32_protein_93__c[c]	(((AT1G62640)) or ((AT2G04540)))	Fatty acid biosynthesis
S_Acetyl_45_CoA_p[d] <=> S_CoA_p[d] + S_Acetyl_45__91_acyl_45_carrier_32_protein_93__p[d]	(((AT1G62640)) or ((AT2G04540)))	Fatty acid biosynthesis
S_3_45_Methyl_45_2_45_oxobutanoic_32_acid_c[c] + S_Lipoamide_c[c] -> S_CO2_c[c] + S_S_45__40_2_45_Methylpropanoyl_41__45_dihydrolipoamide_c[c]	(((AT1G21400)) or ((AT1G55510)) or ((AT3G13450)) or ((AT4G31400)) or ((AT5G09300)) or ((AT5G34780)))	Valine, leucine and isoleucine degradation
S_ATP_c[c] + S_H2O_c[c] -> S_ADP_c[c] + S_Orthophosphate_c[c] + S_Isomaltose_c[c]	(((AT1G03190)) or ((AT1G08840)) or ((AT1G10930)) or ((AT1G20960)) or ((AT1G27880)) or ((AT1G31360)) or ((AT1G35530)) or ((AT1G67440)) or ((AT1G79890)) or ((AT2G01440)) or ((AT2G13370)) or ((AT2G33730)) or ((AT3G19210)) or ((AT3G53110)) or ((AT5G41360)) or ((AT5G51280)) or ((AT5G61140)) or ((AT5G67630)))	Starch and sucrose metabolism
S_ATP_c[c] + S_D_45_Gluconic_32_acid_c[c] -> S_ADP_c[c] + S_6_45_Phospho_45_D_45_gluconate_c[c]	(((AT2G16790)))	Pentose phosphate pathway
S_myo_45_Inositol_c[c] + S_CDP_45_diacylglycerol_c[c] -> S_CMP_c[c] + S_1_45_Phosphatidyl_45_D_45_myo_45_inositol_c[c]	(((AT1G68000)) or ((AT4G38570)))	Glycerophospholipid metabolism; Phosphatidylinositol signaling system
S_D_45_Glucosamine_c[c] -> S_H2O_c[c] + S_D_45_Glucosaminide_c[c]	(((AT2G39930)) or ((AT3G60120)) or ((AT4G09020)) or ((AT5G24540)) or ((AT5G24550)))	Aminosugars metabolism
S_H2O_c[c] -> S_D_45_Galacturonate_c[c] + S_Pectate_c[c]	(((AT1G02790)) or ((AT3G07850)) or ((AT3G15720)) or ((AT3G59850)) or ((AT5G14650)) or ((AT5G17200)))	Starch and sucrose metabolism
S_Phosphatidylserine_c[c] -> S_CO2_c[c] + S_Phosphatidylethanolamine_c[c]	(((AT4G16700)))	Glycerophospholipid metabolism; Glycine, serine and threonine metabolism
S_Starch_p[d] -> S_H2O_p[d] + S_Dextrin_p[d]	(((AT4G25000)))	Starch and sucrose metabolism
2 S_Amylose_p[d] -> S_Starch_p[d]	(((AT2G36390)) or ((AT5G03650)))	Starch and sucrose metabolism
S_Starch_p[d] -> S_Maltose_p[d]	(((AT4G17090)))	Starch and sucrose metabolism
S_Ubiquinol_c[c] <=> S_Ubiquinone_c[c] + 2 S_H_43__c[c]	(((ARTHCP025)) or ((ARTHCP026)) or ((ARTHCP027)) or ((ARTHCP068)) or ((ARTHCP071)) or ((ARTHCP074)) or ((ARTHCP076)) or ((ARTHCP077)) or ((ARTHCP078)) or ((ARTHCP079)) or ((ARTHCP080)) or ((ARTHMP006)) or ((ARTHMP007)) or ((ARTHMP024)) or ((ARTHMP026)) or ((ARTHMP043)) or ((ARTHMP051)) or ((ARTHMP058)) or ((ARTHMP086)) or ((AT1G16700)) or ((AT1G49140)) or ((AT1G65290)) or ((AT1G79010)) or ((AT2G0…	Ubiquinone biosynthesis
S_ATP_c[c] + S_1_44_2_45_Diacyl_45_sn_45_glycerol_c[c] -> S_ADP_c[c] + S_Phosphatidate_c[c]	(((AT5G07920)) or ((AT5G63770)))	Glycerolipid metabolism; Glycerophospholipid metabolism; Phosphatidylinositol signaling system
S_ATP_c[c] + S_5_45_Formyltetrahydrofolate_c[c] -> S_ADP_c[c] + S_Orthophosphate_c[c] + S_5_44_10_45_Methenyltetrahydrofolate_c[c]	(((AT1G76730)))	One carbon pool by folate
S_H2O_c[c] -> S_Chitin_c[c] + S_N_45_Acetyl_45_D_45_glucosaminide_c[c]	(((AT3G12500)) or ((AT3G54420)) or ((AT5G24090)))	Aminosugars metabolism
S_H2O_c[c] -> S_Pectate_c[c] + S_4_45__40_4_45_Deoxy_45_beta_45_D_45_gluc_45_4_45_enuronosyl_41__45_D_45_galacturonate_c[c]	(((AT3G15720)) or ((AT3G59850)) or ((AT5G14650)) or ((AT5G17200)))	Pentose and glucuronate interconversions
S_H2O_c[c] -> S_Pectate_c[c] + S_4_45__40_4_45_Deoxy_45_alpha_45_D_45_gluc_45_4_45_enuronosyl_41__45_D_45_galacturonate_c[c]	(((AT1G30350)) or ((AT3G09540)) or ((AT3G24670)) or ((AT3G27400)) or ((AT3G55140)) or ((AT4G13710)) or ((AT5G09280)) or ((AT5G55720)))	Pentose and glucuronate interconversions
S_H2O_c[c] + S_Pectin_c[c] -> S_Methanol_c[c] + S_Pectate_c[c]	(((AT1G11590)) or ((AT1G53830)) or ((AT2G45220)) or ((AT2G47030)) or ((AT3G43270)) or ((AT5G04970)) or ((AT5G19730)) or ((AT5G49180)))	Pentose and glucuronate interconversions; Starch and sucrose metabolism
S_H2O_c[c] + S_Oxygen_c[c] + S_Tyramine_c[c] -> S_NH3_c[c] + S_H2O2_c[c] + S_4_45_Hydroxyphenylacetaldehyde_c[c]	(((AT2G42490)) or ((AT3G43670)) or ((AT4G14940)))	Tyrosine metabolism
S_Oxygen_c[c] + S_NADPH_c[c] + S_Homogentisate_c[c] -> S_CO2_c[c] + S_H2O_c[c] + S_H_43__c[c] + S_NADP_43__c[c] + S_Gentisate_32_aldehyde_c[c]	(((AT4G09520)))	Tyrosine metabolism
S_H2O_c[c] + S_Oxygen_c[c] + S_Aminoacetone_c[c] -> S_NH3_c[c] + S_H2O2_c[c] + S_Methylglyoxal_c[c]	(((AT2G42490)) or ((AT3G43670)) or ((AT4G14940)))	Glycine, serine and threonine metabolism
S_H2O_c[c] + S_Oxygen_c[c] + S_Phenethylamine_c[c] -> S_NH3_c[c] + S_H2O2_c[c] + S_Phenylacetaldehyde_c[c]	(((AT2G42490)) or ((AT3G43670)) or ((AT4G14940)))	Phenylalanine metabolism
S_3_45_Hydroxyanthranilate_c[c] + S_Activated_32_methyl_32_group_c[c] -> S_3_45_Methoxyanthranilate_c[c]	(((AT1G50000)) or ((AT2G19670)) or ((AT2G47420)) or ((AT3G13180)) or ((AT3G20020)) or ((AT3G27180)) or ((AT4G16570)) or ((AT4G29510)) or ((AT5G57300)) or ((AT5G66360)))	Tryptophan metabolism
S_UDP_45_D_45_galactose_c[c] + S_1_44_2_45_Diacyl_45_sn_45_glycerol_c[c] -> S_UDP_c[c] + S_1_44_2_45_Diacyl_45_3_45_beta_45_D_45_galactosyl_45_sn_45_glycerol_c[c]	(((AT2G11810)) or ((AT4G31780)) or ((AT5G20410)))	Glycerolipid metabolism
S_L_45_Serine_c[c] + S_Indoleglycerol_32_phosphate_c[c] <=> S_H2O_c[c] + S__40_2R_41__45_2_45_Hydroxy_45_3_45__40_phosphonooxy_41__45_propanal_c[c] + S_L_45_Tryptophan_c[c]	(((AT3G54640)) or ((AT4G02610)) or ((AT4G27070)) or ((AT5G38530)) or ((AT5G54810)))	Phenylalanine, tyrosine and tryptophan biosynthesis
S_Cyanohydrin_c[c] -> S_Cyanide_c[c] + S_Ketone_c[c]	(((AT1G73050)) or ((AT3G07990)))	Cyanoamino acid metabolism
S_H_43__c[c] + S_NADPH_c[c] + S_Tropinone_c[c] -> S_NADP_43__c[c] + S_Tropine_c[c]	(((AT1G07450)) or ((AT2G29150)) or ((AT2G29260)) or ((AT2G29290)) or ((AT2G29300)) or ((AT2G29310)) or ((AT2G29320)) or ((AT2G29330)) or ((AT2G29340)) or ((AT2G29360)) or ((AT2G29370)) or ((AT2G30670)) or ((AT5G06060)))	Alkaloid biosynthesis II
S_NAD_43__c[c] + S_Cortisol_c[c] -> S_H_43__c[c] + S_NADH_c[c] + S_Cortisone_c[c]	(((AT3G47350)))	C21-Steroid hormone metabolism
S_Activated_32_methyl_32_group_c[c] + S_3_45__40_2_45_Aminoethyl_41__45_1H_45_indol_45_5_45_ol_c[c] -> S_5_45_Methoxytryptamine_c[c]	(((AT1G50000)) or ((AT2G19670)) or ((AT2G47420)) or ((AT3G13180)) or ((AT3G20020)) or ((AT3G27180)) or ((AT4G16570)) or ((AT4G29510)) or ((AT5G57300)) or ((AT5G66360)))	Tryptophan metabolism
S_tRNA_40_Tyr_41__c[c] + S_ATP_c[c] + S_L_45_Tyrosine_c[c] -> S_L_45_Tyrosyl_45_tRNA_40_Tyr_41__c[c] + S_Pyrophosphate_c[c] + S_AMP_c[c]	(((AT2G33840)) or ((AT3G02660)))	Aminoacyl-tRNA biosynthesis; Phenylalanine, tyrosine and tryptophan biosynthesis
S_4_45_Coumarate_c[c] -> S_CO2_c[c] + S_4_45_Hydroxystyrene_c[c]	(((AT4G09520)))	Stilbene, coumarine and lignin biosynthesis
S_tRNA_40_Ala_41__c[c] + S_ATP_c[c] + S_L_45_Alanine_c[c] <=> S_L_45_Alanyl_45_tRNA_c[c] + S_Pyrophosphate_c[c] + S_AMP_c[c]	(((AT1G50200)))	Alanine and aspartate metabolism; Aminoacyl-tRNA biosynthesis
S_H2O_c[c] + S_Leukotriene_32_A4_c[c] -> S_Leukotriene_32_B4_c[c]	(((AT5G13520)))	Arachidonic acid metabolism
S_H2O_c[c] + S_Oxygen_c[c] + S_1_44_3_45_Diaminopropane_c[c] -> S_NH3_c[c] + S_H2O2_c[c] + S_beta_45_Aminopropion_32_aldehyde_c[c]	(((AT2G42490)) or ((AT3G43670)) or ((AT4G14940)))	beta-Alanine metabolism
S_Oxygen_p[d] + S_D_45_Ribulose_32_1_44_5_45_bisphosphate_p[d] -> S_3_45_Phospho_45_D_45_glycerate_p[d] + S_2_45_Phosphoglycolate_p[d]	(((ARTHCP030)) or ((AT1G67090)) or ((AT5G38410)) or ((AT5G38420)) or ((AT5G38430)))	Glyoxylate and dicarboxylate metabolism
S_ATP_c[c] + S_Nicotinate_32_D_45_ribonucleoside_c[c] -> S_ADP_c[c] + S_Nicotinate_32_D_45_ribonucleotide_c[c]	(((AT1G04440)) or ((AT1G14370)) or ((AT1G20930)) or ((AT1G24650)) or ((AT1G28440)) or ((AT1G30270)) or ((AT1G35670)) or ((AT1G57870)) or ((AT1G66150)) or ((AT1G74740)) or ((AT1G75820)) or ((AT1G76540)) or ((AT2G01450)) or ((AT2G17290)) or ((AT2G30980)) or ((AT2G38910)) or ((AT3G49370)) or ((AT3G50500)) or ((AT3G50530)) or ((AT3G51850)) or ((AT3G53030)) or ((AT3G55450)) or ((AT3G56760)) or ((AT3G5…	Nicotinate and nicotinamide metabolism
S_ATP_c[c] + S_1_45_Phosphatidyl_45_D_45_myo_45_inositol_c[c] -> S_ADP_c[c] + S_1_45_Phosphatidyl_45_1D_45_myo_45_inositol_32_3_45_phosphate_c[c]	(((AT1G60490)))	Inositol phosphate metabolism; Phosphatidylinositol signaling system
S_3_44_4_45_Dihydroxy_45_trans_45_cinnamate_c[c] <=> S_CO2_c[c] + S_3_44_4_45_Dihydroxystyrene_c[c]	(((AT4G09520)))	Stilbene, coumarine and lignin biosynthesis
S_ATP_c[c] + S_1_45_Phosphatidyl_45_1D_45_myo_45_inositol_32_4_45_phosphate_c[c] -> S_ADP_c[c] + S_1_45_Phosphatidyl_45_D_45_myo_45_inositol_32_4_44_5_45_bisphosphate_c[c]	(((AT1G10900)) or ((AT1G21980)) or ((AT1G60890)) or ((AT1G71010)) or ((AT1G77740)) or ((AT2G26420)) or ((AT2G41210)) or ((AT3G07960)) or ((AT3G09920)) or ((AT3G14270)) or ((AT3G56960)) or ((AT4G33240)))	Inositol phosphate metabolism; Phosphatidylinositol signaling system
S_H2O_c[c] + S_Maleamate_c[c] -> S_NH3_c[c] + S_Maleic_32_acid_c[c]	(((AT3G02875)) or ((AT4G22330)) or ((AT5G56650)))	Nicotinate and nicotinamide metabolism
S_tRNA_40_Asn_41__c[c] + S_ATP_c[c] + S_L_45_Asparagine_c[c] -> S_L_45_Asparaginyl_45_tRNA_40_Asn_41__c[c] + S_Pyrophosphate_c[c] + S_AMP_c[c]	(((AT1G70980)) or ((AT3G07420)) or ((AT4G17300)) or ((AT5G56680)))	Alanine and aspartate metabolism; Aminoacyl-tRNA biosynthesis
S_tRNA_40_Cys_41__c[c] + S_ATP_c[c] + S_L_45_Cysteine_c[c] -> S_L_45_Cysteinyl_45_tRNA_40_Cys_41__c[c] + S_Pyrophosphate_c[c] + S_AMP_c[c]	(((AT2G31170)) or ((AT3G56300)) or ((AT5G38830)))	Aminoacyl-tRNA biosynthesis; Cysteine metabolism
S_tRNA_40_Gln_41__c[c] + S_ATP_c[c] + S_L_45_Glutamine_c[c] -> S_Glutaminyl_45_tRNA_40_Gln_41__c[c] + S_Pyrophosphate_c[c] + S_AMP_c[c]	(((AT1G25350)))	Aminoacyl-tRNA biosynthesis; Glutamate metabolism
S_tRNA_40_Gly_41__c[c] + S_ATP_c[c] + S_Glycine_c[c] -> S_Glycyl_45_tRNA_40_Gly_41__c[c] + S_Pyrophosphate_c[c] + S_AMP_c[c]	(((AT1G29870)) or ((AT1G29880)))	Aminoacyl-tRNA biosynthesis; Glycine, serine and threonine metabolism
S_tRNA_40_His_41__c[c] + S_ATP_c[c] + S_L_45_Histidine_c[c] -> S_L_45_Histidyl_45_tRNA_40_His_41__c[c] + S_Pyrophosphate_c[c] + S_AMP_c[c]	(((AT3G02760)) or ((AT3G46100)))	Aminoacyl-tRNA biosynthesis; Histidine metabolism
S_tRNA_40_Ile_41__c[c] + S_ATP_c[c] + S_L_45_Isoleucine_c[c] -> S_L_45_Isoleucyl_45_tRNA_40_Ile_41__c[c] + S_Pyrophosphate_c[c] + S_AMP_c[c]	(((AT4G10320)))	Aminoacyl-tRNA biosynthesis; Valine, leucine and isoleucine biosynthesis
S_tRNA_40_Leu_41__c[c] + S_ATP_c[c] + S_L_45_Leucine_c[c] -> S_L_45_Leucyl_45_tRNA_40_Leu_41__c[c] + S_Pyrophosphate_c[c] + S_AMP_c[c]	(((AT4G04350)))	Aminoacyl-tRNA biosynthesis; Valine, leucine and isoleucine biosynthesis
S_tRNA_40_Lys_41__c[c] + S_ATP_c[c] + S_L_45_Lysine_c[c] -> S_L_45_Lysyl_45_tRNA_40_Lys_41__c[c] + S_Pyrophosphate_c[c] + S_AMP_c[c]	(((AT3G11710)) or ((AT3G13490)))	Aminoacyl-tRNA biosynthesis; Lysine biosynthesis
S_tRNA_40_Met_41__c[c] + S_ATP_c[c] + S_L_45_Methionine_c[c] -> S_L_45_Methionyl_45_tRNA_40_Met_41__c[c] + S_Pyrophosphate_c[c] + S_AMP_c[c]	(((AT3G55400)) or ((AT4G13780)))	Aminoacyl-tRNA biosynthesis; Methionine metabolism
S_tRNA_40_Phe_41__c[c] + S_ATP_c[c] + S_L_45_Phenylalanine_c[c] -> S_L_45_Phenylalanyl_45_tRNA_40_Phe_41__c[c] + S_Pyrophosphate_c[c] + S_AMP_c[c]	(((AT1G72550)) or ((AT3G58140)) or ((AT4G39280)))	Aminoacyl-tRNA biosynthesis; Phenylalanine, tyrosine and tryptophan biosynthesis
S_tRNA_40_Pro_41__c[c] + S_ATP_c[c] + S_L_45_Proline_c[c] -> S_L_45_Prolyl_45_tRNA_40_Pro_41__c[c] + S_Pyrophosphate_c[c] + S_AMP_c[c]	(((AT5G52520)))	Aminoacyl-tRNA biosynthesis; Arginine and proline metabolism
S_tRNA_40_Ser_41__c[c] + S_ATP_c[c] + S_L_45_Serine_c[c] -> S_L_45_Seryl_45_tRNA_40_Ser_41__c[c] + S_Pyrophosphate_c[c] + S_AMP_c[c]	(((AT5G27470)))	Aminoacyl-tRNA biosynthesis; Glycine, serine and threonine metabolism
S_tRNA_40_Thr_41__c[c] + S_ATP_c[c] + S_L_45_Threonine_c[c] -> S_L_45_Threonyl_45_tRNA_40_Thr_41__c[c] + S_Pyrophosphate_c[c] + S_AMP_c[c]	(((AT5G26830)))	Aminoacyl-tRNA biosynthesis; Glycine, serine and threonine metabolism
S_tRNA_40_Trp_41__c[c] + S_ATP_c[c] + S_L_45_Tryptophan_c[c] -> S_L_45_Tryptophanyl_45_tRNA_40_Trp_41__c[c] + S_Pyrophosphate_c[c] + S_AMP_c[c]	(((AT3G04600)))	Aminoacyl-tRNA biosynthesis; Tryptophan metabolism
S_tRNA_40_Val_41__c[c] + S_ATP_c[c] + S_L_45_Valine_c[c] -> S_L_45_Valyl_45_tRNA_40_Val_41__c[c] + S_Pyrophosphate_c[c] + S_AMP_c[c]	(((AT1G14610)) or ((AT5G16710)))	Aminoacyl-tRNA biosynthesis; Valine, leucine and isoleucine biosynthesis
S_Reduced_32_ferredoxin_c[c] + S_Biliverdin_c[c] -> S_Oxidized_32_ferredoxin_c[c] + S__40_3Z_41__45_Phytochromobilin_c[c]	(((AT3G09150)))	Porphyrin and chlorophyll metabolism
S_Tryptamine_c[c] + S_Secologanin_c[c] -> S_H2O_c[c] + S_3_45_alpha_40_S_41__45_Strictosidine_c[c]	(((AT1G74010)) or ((AT1G74020)))	Indole and ipecac alkaloid biosynthesis; Terpenoid biosynthesis
S_H_43__c[c] + S_Reduced_32_acceptor_c[c] + S_gamma_45_Carotene_c[c] -> S_Acceptor_c[c] + S_beta_45_Carotene_c[c]	(((AT1G01190)) or ((AT1G01600)) or ((AT1G11600)) or ((AT1G11610)) or ((AT1G13090)) or ((AT1G13100)) or ((AT1G13710)) or ((AT2G30750)) or ((AT2G30770)) or ((AT3G10230)) or ((AT3G13730)) or ((AT3G26150)) or ((AT3G26160)) or ((AT3G26170)) or ((AT3G26190)) or ((AT3G26200)) or ((AT3G26210)) or ((AT3G26220)) or ((AT3G26230)) or ((AT3G26270)) or ((AT3G26280)) or ((AT3G26290)) or ((AT3G26300)) or ((AT3G2…	Biosynthesis of steroids
S_NAD_43__c[c] + S_Corticosterone_c[c] -> S_H_43__c[c] + S_NADH_c[c] + S_11_45_Dehydrocorticosterone_c[c]	(((AT3G47350)))	C21-Steroid hormone metabolism
S_S_45_Adenosyl_45_L_45_methionine_c[c] + S_N_45_Methyltyramine_c[c] -> S_S_45_Adenosyl_45_L_45_homocysteine_c[c] + S_Hordenine_c[c]	(((AT1G50000)) or ((AT2G19670)) or ((AT2G47420)) or ((AT3G13180)) or ((AT3G20020)) or ((AT3G27180)) or ((AT4G16570)) or ((AT4G29510)) or ((AT5G57300)) or ((AT5G66360)))	Tyrosine metabolism
S_Xanthurenic_32_acid_c[c] -> S_8_45_Methoxykynurenate_c[c]	(((AT1G50000)) or ((AT2G19670)) or ((AT2G47420)) or ((AT3G13180)) or ((AT3G20020)) or ((AT3G27180)) or ((AT4G16570)) or ((AT4G29510)) or ((AT5G57300)) or ((AT5G66360)))	Tryptophan metabolism
S_CO2_c[c] + S_4_45_Guanidinobutanal_c[c] <=> S_2_45_Oxoarginine_c[c]	(((AT4G09520)))	Arginine and proline metabolism
S_Oxygen_c[c] + S_N_45_Methylputrescine_c[c] -> S_NH3_c[c] + S_H2O2_c[c] + S_1_45_Methylpyrrolinium_c[c]	(((AT2G42490)) or ((AT3G43670)) or ((AT4G14940)))	Alkaloid biosynthesis II
S_2_45_Hydroxyhepta_45_2_44_4_45_dienedioate_c[c] -> S_2_45_Oxohept_45_3_45_enedioate_c[c]	(((AT5G43280)))	Tyrosine metabolism
S_3_45_Hydroxy_45_L_45_kynurenine_c[c] -> S_CO2_c[c] + S_3_45_Hydroxykynurenamine_c[c]	(((AT4G09520)))	Tryptophan metabolism
S_H2O_c[c] + S__40_Z_41__45_5_45_Oxohex_45_2_45_enedioate_c[c] -> S_CO2_c[c] + S_4_45_Hydroxy_45_2_45_oxopentanoate_c[c]	(((AT4G09520)))	Benzoate degradation via hydroxylation; Fluorene degradation
S_Tetrahydrofolyl_45__91_Glu_93__40_n_41__c[c] -> S_Tetrahydrofolate_c[c] + S_Poly_45_L_45_glutamate_c[c]	(((AT1G78670)) or ((AT1G78680)))	Folate biosynthesis
S_3_44_4_39__44_5_45_Trihydroxystilbene_c[c] -> S_3_44_3_39__44_4_39_5_45_Tetrahydroxystilbene_c[c]	(((AT1G01190)) or ((AT1G01600)) or ((AT1G11600)) or ((AT1G11610)) or ((AT1G13090)) or ((AT1G13100)) or ((AT1G13710)) or ((AT2G30750)) or ((AT2G30770)) or ((AT3G10230)) or ((AT3G13730)) or ((AT3G26150)) or ((AT3G26160)) or ((AT3G26170)) or ((AT3G26190)) or ((AT3G26200)) or ((AT3G26210)) or ((AT3G26220)) or ((AT3G26230)) or ((AT3G26270)) or ((AT3G26280)) or ((AT3G26290)) or ((AT3G26300)) or ((AT3G2…	Stilbene, coumarine and lignin biosynthesis
S_H2O_c[c] + S_Oxygen_c[c] + S_4_45__40_2_45_Aminoethyl_41__45_1_44_2_45_benzenediol_c[c] -> S_NH3_c[c] + S_H2O2_c[c] + S_3_44_4_45_Dihydroxyphenylacetaldehyde_c[c]	(((AT2G42490)) or ((AT3G43670)) or ((AT4G14940)))	Tyrosine metabolism
S_H2O_c[c] + S_Protein_32_N6_44_N6_44_N6_45_trimethyl_45_L_45_lysine_c[c] -> S_N6_44_N6_44_N6_45_Trimethyl_45_L_45_lysine_c[c] + S_Protein_c[c]	(((AT1G28120)) or ((AT1G71230)) or ((AT5G27430)))	Lysine degradation
S_Acetyl_45__91_acyl_45_carrier_32_protein_93__c[c] + S_Malonyl_45__91_acyl_45_carrier_32_protein_93__c[c] -> S_CO2_c[c] + S_Acetoacetyl_45__91_acp_93__c[c]	(((AT1G62640)) or ((AT2G04540)))	Fatty acid biosynthesis
S_Acetyl_45__91_acyl_45_carrier_32_protein_93__p[d] + S_Malonyl_45__91_acyl_45_carrier_32_protein_93__p[d] -> S_CO2_p[d] + S_Acetoacetyl_45__91_acp_93__p[d]	(((AT1G62640)) or ((AT2G04540)))	Fatty acid biosynthesis
S_UDP_45_glucose_c[c] + S_3_45_D_45_Glucosyl_45_1_44_2_45_diacylglycerol_c[c] -> S_UDP_c[c] + S_Diglucosyl_45_diacylglycerol_c[c]	(((AT1G05570)) or ((AT1G11880)) or ((AT1G14070)) or ((AT1G14080)) or ((AT1G16900)) or ((AT1G71220)) or ((AT1G71990)) or ((AT1G78800)) or ((AT2G03210)) or ((AT2G13680)) or ((AT2G15350)) or ((AT2G15370)) or ((AT2G40190)) or ((AT2G44660)) or ((AT3G02350)) or ((AT3G25140)) or ((AT5G01220)) or ((AT5G02410)) or ((AT5G14850)) or ((AT5G22130)) or ((AT5G38460)))	Glycerolipid metabolism
S_H2O_c[c] + S__40_4R_44_5S_41__45_4_44_5_44_6_45_Trihydroxy_45_2_44_3_45_dioxohexanoate_c[c] <=> S_CO2_c[c] + S_L_45_Xylonate_c[c]	(((AT4G09520)))	Ascorbate and aldarate metabolism
S_H2O_c[c] + S_Dihydroneopterin_32_phosphate_c[c] -> S_Orthophosphate_c[c] + S_2_45_Amino_45_4_45_hydroxy_45_6_45__40_D_45_erythro_45_1_44_2_44_3_45_trihydroxypropyl_41__45_7_44_8_45_dihydropteridine_c[c]	(((AT1G03190)) or ((AT1G08840)) or ((AT1G10930)) or ((AT1G20960)) or ((AT1G27880)) or ((AT1G31360)) or ((AT1G35530)) or ((AT1G67440)) or ((AT1G79890)) or ((AT2G01440)) or ((AT2G13370)) or ((AT2G33730)) or ((AT3G19210)) or ((AT3G53110)) or ((AT5G41360)) or ((AT5G51280)) or ((AT5G61140)) or ((AT5G67630)))	Folate biosynthesis
S_H2O_c[c] + S_2_45_Amino_45_4_45_hydroxy_45_6_45__40_erythro_45_1_44_2_44_3_45_trihydroxypropyl_41_dihydropteridine_32_triphosphate_c[c] -> S_Pyrophosphate_c[c] + S_Dihydroneopterin_32_phosphate_c[c]	(((AT1G03190)) or ((AT1G08840)) or ((AT1G10930)) or ((AT1G20960)) or ((AT1G27880)) or ((AT1G31360)) or ((AT1G35530)) or ((AT1G67440)) or ((AT1G79890)) or ((AT2G01440)) or ((AT2G13370)) or ((AT2G33730)) or ((AT3G19210)) or ((AT3G53110)) or ((AT5G41360)) or ((AT5G51280)) or ((AT5G61140)) or ((AT5G67630)))	Folate biosynthesis
S_Malonyl_45__91_acyl_45_carrier_32_protein_93__c[c] + S_Dodecanoyl_45__91_acyl_45_carrier_32_protein_93__c[c] -> S_CO2_c[c] + S_3_45_Oxotetradecanoyl_45__91_acp_93__c[c]	(((AT1G62640)) or ((AT2G04540)))	Fatty acid biosynthesis
S_Malonyl_45__91_acyl_45_carrier_32_protein_93__p[d] + S_Dodecanoyl_45__91_acyl_45_carrier_32_protein_93__p[d] -> S_CO2_p[d] + S_3_45_Oxotetradecanoyl_45__91_acp_93__p[d]	(((AT1G62640)) or ((AT2G04540)))	Fatty acid biosynthesis
S_5_45_Amino_45_4_45_imidazole_32_carboxylate_c[c] -> S_CO2_c[c] + S_5_45_Aminoimidazole_c[c]	(((AT4G09520)))	Purine metabolism
S_NAD_43__c[c] + S_11beta_45_Hydroxyandrost_45_4_45_ene_45_3_44_17_45_dione_c[c] -> S_H_43__c[c] + S_NADH_c[c] + S_Adrenosterone_c[c]	(((AT3G47350)))	Androgen and estrogen metabolism
S_S_45_Adenosyl_45_L_45_methionine_c[c] + S_2_45_Hydroxyestradiol_45_17beta_c[c] -> S_S_45_Adenosyl_45_L_45_homocysteine_c[c] + S_2_45_Methoxyestradiol_45_17beta_c[c]	(((AT1G50000)) or ((AT2G19670)) or ((AT2G47420)) or ((AT3G13180)) or ((AT3G20020)) or ((AT3G27180)) or ((AT4G16570)) or ((AT4G29510)) or ((AT5G57300)) or ((AT5G66360)))	Androgen and estrogen metabolism
S_tRNA_40_Met_41__c[c] + S_ATP_c[c] + S_Selenomethionine_c[c] -> S_Pyrophosphate_c[c] + S_AMP_c[c] + S_Selenomethionyl_45_tRNA_40_Met_41__c[c]	(((AT3G55400)) or ((AT4G13780)))	Selenoamino acid metabolism
S_Glycine_c[c] + S_4_45_Hydroxyphenylacetyl_45_CoA_c[c] -> S_CoA_c[c] + S_4_45_Hydroxyphenylacetylglycine_c[c]	(((AT4G31400)))	Tyrosine metabolism
S_H2O_c[c] + S__40_4R_44_5S_41__45_4_44_5_44_6_45_Trihydroxy_45_2_44_3_45_dioxohexanoate_c[c] <=> S_CO2_c[c] + S_L_45_Lyxonate_c[c]	(((AT4G09520)))	Ascorbate and aldarate metabolism
S_H_43__c[c] + S_Acceptor_c[c] + S_Neurosporene_c[c] -> S_Reduced_32_acceptor_c[c] + S_beta_45_Zeacarotene_c[c]	(((AT1G01190)) or ((AT1G01600)) or ((AT1G11600)) or ((AT1G11610)) or ((AT1G13090)) or ((AT1G13100)) or ((AT1G13710)) or ((AT2G30750)) or ((AT2G30770)) or ((AT3G10230)) or ((AT3G13730)) or ((AT3G26150)) or ((AT3G26160)) or ((AT3G26170)) or ((AT3G26190)) or ((AT3G26200)) or ((AT3G26210)) or ((AT3G26220)) or ((AT3G26230)) or ((AT3G26270)) or ((AT3G26280)) or ((AT3G26290)) or ((AT3G26300)) or ((AT3G2…	Biosynthesis of steroids
S_NAD_43__c[c] + S_Tetrahydrocorticosterone_c[c] -> S_H_43__c[c] + S_NADH_c[c] + S_3alpha_44_21_45_Dihydroxy_45_5beta_45_pregnane_45_11_44_20_45_dione_c[c]	(((AT3G47350)))	C21-Steroid hormone metabolism
S_S_45_Adenosyl_45_L_45_methionine_c[c] + S_DNA_32_cytosine_c[c] -> S_S_45_Adenosyl_45_L_45_homocysteine_c[c] + S_DNA_32_5_45_methylcytosine_c[c]	(((AT1G69770)) or ((AT4G08990)) or ((AT4G13610)) or ((AT4G14140)) or ((AT5G25480)) or ((AT5G49160)))	Methionine metabolism
S_Holo_45__91_carboxylase_93__c[c] -> S_Peptide_c[c] + S_N6_45_D_45_Biotinyl_45_L_45_lysine_c[c]	(((AT1G28120)) or ((AT1G71230)) or ((AT5G27430)))	Biotin metabolism
S_2_45_Carboxy_45_2_44_3_45_dihydro_45_5_44_6_45_dihydroxyindole_c[c] -> S_CO2_c[c] + S_5_44_6_45_Dihydroxyindole_c[c]	(((AT4G09520)))	Tyrosine metabolism
S_H2O_c[c] -> S_D_45_Xylose_c[c] + S_Pentosans_c[c]	(((AT2G39930)) or ((AT3G60120)) or ((AT4G09020)) or ((AT5G24540)) or ((AT5G24550)))	Nucleotide sugars metabolism
S_H2O_c[c] -> S_Pentosans_c[c] + S_L_45_Arabinose_c[c]	(((AT2G39930)) or ((AT3G60120)) or ((AT4G09020)) or ((AT5G24540)) or ((AT5G24550)))	Nucleotide sugars metabolism
S_Se_45_Adenosylselenomethionine_c[c] + S_R_c[c] -> S_Se_45_Adenosylselenohomocysteine_c[c] + S_CH3_45_R_c[c]	(((AT1G50000)) or ((AT2G19670)) or ((AT2G47420)) or ((AT3G13180)) or ((AT3G20020)) or ((AT3G27180)) or ((AT4G16570)) or ((AT4G29510)) or ((AT5G57300)) or ((AT5G66360)))	Selenoamino acid metabolism
S_R_45_S_45_Alanylglycine_c[c] -> S_Glycine_c[c] + S_R_45_S_45_Alanine_c[c]	(((AT2G24200)) or ((AT4G30910)) or ((AT4G30920)))	Glutathione metabolism
S_Malonyl_45__91_acyl_45_carrier_32_protein_93__c[c] + S_Butyryl_45__91_acp_93__c[c] -> S_CO2_c[c] + S_3_45_Oxohexanoyl_45__91_acp_93__c[c]	(((AT1G62640)) or ((AT2G04540)))	Fatty acid biosynthesis
S_Malonyl_45__91_acyl_45_carrier_32_protein_93__p[d] + S_Butyryl_45__91_acp_93__p[d] -> S_CO2_p[d] + S_3_45_Oxohexanoyl_45__91_acp_93__p[d]	(((AT1G62640)) or ((AT2G04540)))	Fatty acid biosynthesis
S_Malonyl_45__91_acyl_45_carrier_32_protein_93__c[c] + S_Hexanoyl_45__91_acp_93__c[c] -> S_CO2_c[c] + S_3_45_Oxooctanoyl_45__91_acp_93__c[c]	(((AT1G62640)) or ((AT2G04540)))	Fatty acid biosynthesis
S_Malonyl_45__91_acyl_45_carrier_32_protein_93__p[d] + S_Hexanoyl_45__91_acp_93__p[d] -> S_CO2_p[d] + S_3_45_Oxooctanoyl_45__91_acp_93__p[d]	(((AT1G62640)) or ((AT2G04540)))	Fatty acid biosynthesis
S_Malonyl_45__91_acyl_45_carrier_32_protein_93__c[c] + S_Octanoyl_45__91_acp_93__c[c] -> S_CO2_c[c] + S_3_45_Oxodecanoyl_45__91_acp_93__c[c]	(((AT1G62640)) or ((AT2G04540)))	Fatty acid biosynthesis
S_Malonyl_45__91_acyl_45_carrier_32_protein_93__p[d] + S_Octanoyl_45__91_acp_93__p[d] -> S_CO2_p[d] + S_3_45_Oxodecanoyl_45__91_acp_93__p[d]	(((AT1G62640)) or ((AT2G04540)))	Fatty acid biosynthesis
S_Malonyl_45__91_acyl_45_carrier_32_protein_93__c[c] + S_Decanoyl_45__91_acp_93__c[c] -> S_CO2_c[c] + S_3_45_Oxododecanoyl_45__91_acp_93__c[c]	(((AT1G62640)) or ((AT2G04540)))	Fatty acid biosynthesis
S_Malonyl_45__91_acyl_45_carrier_32_protein_93__p[d] + S_Decanoyl_45__91_acp_93__p[d] -> S_CO2_p[d] + S_3_45_Oxododecanoyl_45__91_acp_93__p[d]	(((AT1G62640)) or ((AT2G04540)))	Fatty acid biosynthesis
S_Malonyl_45__91_acyl_45_carrier_32_protein_93__c[c] + S_Tetradecanoyl_45__91_acp_93__c[c] -> S_CO2_c[c] + S_3_45_Oxohexadecanoyl_45__91_acp_93__c[c]	(((AT1G62640)) or ((AT2G04540)))	Fatty acid biosynthesis
S_Malonyl_45__91_acyl_45_carrier_32_protein_93__p[d] + S_Tetradecanoyl_45__91_acp_93__p[d] -> S_CO2_p[d] + S_3_45_Oxohexadecanoyl_45__91_acp_93__p[d]	(((AT1G62640)) or ((AT2G04540)))	Fatty acid biosynthesis
S_S_45_Adenosyl_45_L_45_methionine_c[c] + S_2_45_Hexaprenyl_45_6_45_methoxy_45_1_44_4_45_benzoquinone_c[c] -> S_S_45_Adenosyl_45_L_45_homocysteine_c[c] + S_2_45_Hexaprenyl_45_3_45_methyl_45_6_45_methoxy_45_1_44_4_45_benzoquinone_c[c]	(((AT1G50000)) or ((AT2G19670)) or ((AT2G47420)) or ((AT3G13180)) or ((AT3G20020)) or ((AT3G27180)) or ((AT4G16570)) or ((AT4G29510)) or ((AT5G57300)) or ((AT5G66360)))	Ubiquinone biosynthesis
S_S_45_Adenosyl_45_L_45_methionine_c[c] + S_2_45_Octaprenyl_45_6_45_methoxy_45_1_44_4_45_benzoquinone_c[c] -> S_S_45_Adenosyl_45_L_45_homocysteine_c[c] + S_2_45_Octaprenyl_45_3_45_methyl_45_6_45_methoxy_45_1_44_4_45_benzoquinone_c[c]	(((AT1G50000)) or ((AT2G19670)) or ((AT2G47420)) or ((AT3G13180)) or ((AT3G20020)) or ((AT3G27180)) or ((AT4G16570)) or ((AT4G29510)) or ((AT5G57300)) or ((AT5G66360)))	Ubiquinone biosynthesis
S_S_45_Adenosyl_45_L_45_methionine_c[c] + S_2_45_Demethylmenaquinone_c[c] -> S_S_45_Adenosyl_45_L_45_homocysteine_c[c] + S_Menaquinone_c[c]	(((AT1G50000)) or ((AT2G19670)) or ((AT2G47420)) or ((AT3G13180)) or ((AT3G20020)) or ((AT3G27180)) or ((AT4G16570)) or ((AT4G29510)) or ((AT5G57300)) or ((AT5G66360)))	Ubiquinone biosynthesis
S_UDP_45_N_45_acetyl_45_D_45_glucosamine_c[c] + S_Undecaprenyl_45_diphospho_45_N_45_acetylmuramoyl_45_L_45_alanyl_45_D_45_glutamyl_45_L_45_lysyl_45_D_45_alanyl_45_D_45_alanine_c[c] -> S_UDP_c[c] + S_Undecaprenyl_45_diphospho_45_N_45_acetylmuramoyl_45__40_N_45_acetylglucosamine_41__45_L_45_alanyl_45_D_45_glutamyl_45_L_45_lysyl_45_D_45_alanyl_45_D_45_alanine_c[c]	(((AT1G73740)))	Peptidoglycan biosynthesis
S_UDP_45_N_45_acetyl_45_D_45_glucosamine_c[c] + S_Undecaprenyl_45_diphospho_45_N_45_acetylmuramoyl_45_L_45_alanyl_45_D_45_glutamyl_45_meso_45_2_44_6_45_diaminopimeloyl_45_D_45_alanyl_45_D_45_alanine_c[c] -> S_UDP_c[c] + S_Undecaprenyl_45_diphospho_45_N_45_acetylmuramoyl_45__40_N_45_acetylglucosamine_41__45_L_45_alanyl_45_D_45_glutamyl_45_meso_45_2_44_6_45_diaminopimeloyl_45_D_45_alanyl_45_D_45_al…	(((AT1G73740)))	Peptidoglycan biosynthesis
S_Phosphonoacetaldehyde_c[c] + S_Methylcobalamin_c[c] -> S_2_45_Hydroxypropylphosphonate_c[c] + S_Vitamin_32_B12_c[c]	(((AT1G50000)) or ((AT2G19670)) or ((AT2G47420)) or ((AT3G13180)) or ((AT3G20020)) or ((AT3G27180)) or ((AT4G16570)) or ((AT4G29510)) or ((AT5G57300)) or ((AT5G66360)))	Aminophosphonate metabolism
S_Oxygen_c[c] + 3 S_H_43__c[c] + S_4_45_Nitrocatechol_c[c] -> S_H2O_c[c] + S_Nitrite_c[c] + S_Benzene_45_1_44_2_44_4_45_triol_c[c]	(((AT1G01190)) or ((AT1G01600)) or ((AT1G11600)) or ((AT1G11610)) or ((AT1G13090)) or ((AT1G13100)) or ((AT1G13710)) or ((AT2G30750)) or ((AT2G30770)) or ((AT3G10230)) or ((AT3G13730)) or ((AT3G26150)) or ((AT3G26160)) or ((AT3G26170)) or ((AT3G26190)) or ((AT3G26200)) or ((AT3G26210)) or ((AT3G26220)) or ((AT3G26230)) or ((AT3G26270)) or ((AT3G26280)) or ((AT3G26290)) or ((AT3G26300)) or ((AT3G2…	gamma-Hexachlorocyclohexane degradation
S_Lycopene_c[c] <=> S_gamma_45_Carotene_c[c]	(((AT1G01190)) or ((AT1G01600)) or ((AT1G11600)) or ((AT1G11610)) or ((AT1G13090)) or ((AT1G13100)) or ((AT1G13710)) or ((AT2G30750)) or ((AT2G30770)) or ((AT3G10230)) or ((AT3G13730)) or ((AT3G26150)) or ((AT3G26160)) or ((AT3G26170)) or ((AT3G26190)) or ((AT3G26200)) or ((AT3G26210)) or ((AT3G26220)) or ((AT3G26230)) or ((AT3G26270)) or ((AT3G26280)) or ((AT3G26290)) or ((AT3G26300)) or ((AT3G2…	Biosynthesis of steroids
S_1_45_Phenylethanol_c[c] -> 2 S_H_43__c[c] + S_Acetophenone_c[c] + 2 S_e_45__c[c]	(((AT1G18270)) or ((AT3G03330)) or ((AT4G05530)))	Ethylbenzene degradation
S_Bis_40_4_39__45_chlorophenyl_41_acetate_c[c] -> S_CO2_c[c] + S_Bis_40_4_39__45_chlorophenyl_41_methane_c[c]	(((AT4G09520)))	1,1,1-Trichloro-2,2-bis(4-chlorophenyl)ethane (DDT) degradation
S_Oxygen_c[c] + 2 S_H_43__c[c] + 2 S_e_45__c[c] + S_Fluorene_c[c] -> S_H2O_c[c] + S_Fluoren_45_9_45_ol_c[c]	(((AT1G01190)) or ((AT1G01600)) or ((AT1G11600)) or ((AT1G11610)) or ((AT1G13090)) or ((AT1G13100)) or ((AT1G13710)) or ((AT2G30750)) or ((AT2G30770)) or ((AT3G10230)) or ((AT3G13730)) or ((AT3G26150)) or ((AT3G26160)) or ((AT3G26170)) or ((AT3G26190)) or ((AT3G26200)) or ((AT3G26210)) or ((AT3G26220)) or ((AT3G26230)) or ((AT3G26270)) or ((AT3G26280)) or ((AT3G26290)) or ((AT3G26300)) or ((AT3G2…	Fluorene degradation
S_trans_44_trans_45_Farnesyl_32_diphosphate_c[c] + S_Isopentenyl_32_diphosphate_c[c] <=> S_Pyrophosphate_c[c] + S_trans_44_trans_44_cis_45_Geranylgeranyl_32_diphosphate_c[c]	(((AT1G17050)) or ((AT1G60600)) or ((AT1G78510)) or ((AT2G23410)) or ((AT2G44050)) or ((AT2G44520)) or ((AT5G58770)))	N-Glycan biosynthesis; Terpenoid biosynthesis
S_Acceptor_c[c] + S_2_44_6_45_Dihydroxycyclohexane_45_1_45_carboxyl_45_CoA_c[c] -> S_Reduced_32_acceptor_c[c] + S_6_45_Oxo_45_2_45_hydroxycyclohexane_45_1_45_carboxyl_45_CoA_c[c]	(((AT1G18270)) or ((AT3G03330)) or ((AT4G05530)))	Benzoate degradation via CoA ligation
S_CoA_c[c] + S_3_45_Oxopimeloyl_45_CoA_c[c] -> S_Acetyl_45_CoA_c[c] + S_Glutaryl_45_CoA_c[c]	(((AT4G31400)))	Benzoate degradation via CoA ligation
S_CH3_45_R_c[c] + S_1_45_Phenanthrol_c[c] -> S_R_c[c] + S_1_45_Methoxyphenanthrene_c[c]	(((AT1G50000)) or ((AT2G19670)) or ((AT2G47420)) or ((AT3G13180)) or ((AT3G20020)) or ((AT3G27180)) or ((AT4G16570)) or ((AT4G29510)) or ((AT5G57300)) or ((AT5G66360)))	Nitrobenzene degradation
S_UDP_45_N_45_acetyl_45_D_45_glucosamine_c[c] + S_MurAc_40_oyl_45_L_45_Ala_45_D_45_gamma_45_Glu_45_L_45_Lys_45_D_45_Ala_45_D_45_Ala_41__45_diphospho_45_undecaprenol_c[c] <=> S_UDP_c[c] + S_Undecaprenyl_45_diphospho_45_N_45_acetylmuramoyl_45__40_N_45_acetylglucosamine_41__45_L_45_alanyl_45_gamma_45_D_45_glutamyl_45_L_45_lysyl_45_D_45_alanyl_45_D_45_alanine_c[c]	(((AT1G73740)))	Peptidoglycan biosynthesis
S_Geranyl_32_diphosphate_c[c] -> S_Pyrophosphate_c[c] + S(45)45_alpha_45_Pinene_c[c]	(((AT4G16730)))	Monoterpenoid biosynthesis
S_Geranyl_32_diphosphate_c[c] -> S_Pyrophosphate_c[c] + S(45)45_beta_45_Pinene_c[c]	(((AT4G16730)))	Monoterpenoid biosynthesis
S_Glycine_c[c] + S_Phenylacetyl_45_CoA_c[c] <=> S_CoA_c[c] + S_Phenylacetylglycine_c[c]	(((AT4G31400)))	Phenylalanine metabolism
S_UDP_45_N_45_acetyl_45_D_45_glucosamine_c[c] + S_1_45_Phosphatidyl_45_D_45_myo_45_inositol_c[c] -> S_UDP_c[c] + S_G00143_c[c]	(((AT3G45100)))	Glycosylphosphatidylinositol(GPI)-anchor biosynthesis
S_Dolichyl_32_phosphate_32_D_45_mannose_c[c] + S_G00145_c[c] -> S_Dolichyl_32_phosphate_c[c] + S_G00146_c[c]	(((AT1G05570)) or ((AT1G11880)) or ((AT1G14070)) or ((AT1G14080)) or ((AT1G16900)) or ((AT1G71220)) or ((AT1G71990)) or ((AT1G78800)) or ((AT2G03210)) or ((AT2G13680)) or ((AT2G15350)) or ((AT2G15370)) or ((AT2G40190)) or ((AT2G44660)) or ((AT3G02350)) or ((AT3G25140)) or ((AT5G01220)) or ((AT5G02410)) or ((AT5G14850)) or ((AT5G22130)) or ((AT5G38460)))	Glycosylphosphatidylinositol(GPI)-anchor biosynthesis
S_Dolichyl_32_phosphate_32_D_45_mannose_c[c] + S_G00148_c[c] -> S_Dolichyl_32_phosphate_c[c] + S_G00149_c[c]	(((AT1G05570)) or ((AT1G11880)) or ((AT1G14070)) or ((AT1G14080)) or ((AT1G16900)) or ((AT1G71220)) or ((AT1G71990)) or ((AT1G78800)) or ((AT2G03210)) or ((AT2G13680)) or ((AT2G15350)) or ((AT2G15370)) or ((AT2G40190)) or ((AT2G44660)) or ((AT3G02350)) or ((AT3G25140)) or ((AT5G01220)) or ((AT5G02410)) or ((AT5G14850)) or ((AT5G22130)) or ((AT5G38460)))	Glycosylphosphatidylinositol(GPI)-anchor biosynthesis
S_H2O_c[c] + S_Globoside_c[c] <=> S_Globotriaosylceramide_c[c] + S_N_45_Acetyl_45_D_45_galactosamine_c[c]	(((AT1G05590)) or ((AT3G55260)))	Glycosphingolipid biosynthesis - globoseries
S_UDP_45_N_45_acetyl_45_D_45_glucosamine_c[c] + S_Dolichyl_32_phosphate_c[c] -> S_UMP_c[c] + S_N_45_Acetyl_45_D_45_glucosaminyldiphosphodolichol_c[c]	(((AT2G41490)) or ((AT3G57220)))	N-Glycan biosynthesis
S_UDP_45_N_45_acetyl_45_D_45_glucosamine_c[c] + S_N_45_Acetyl_45_D_45_glucosaminyldiphosphodolichol_c[c] -> S_UDP_c[c] + S_N_44_N_39__45_Chitobiosyldiphosphodolichol_c[c]	(((AT4G16710)) or ((AT4G18230)))	N-Glycan biosynthesis
S_N_44_N_39__45_Chitobiosyldiphosphodolichol_c[c] + S_GDP_45_D_45_mannose_c[c] -> S_GDP_c[c] + S_G00003_c[c]	(((AT1G16570)))	N-Glycan biosynthesis
S_GDP_45_D_45_mannose_c[c] + S_G00003_c[c] -> S_GDP_c[c] + S_G00004_c[c]	(((AT1G78800)))	N-Glycan biosynthesis
S_G00008_c[c] + S_Protein_32_asparagine_c[c] -> S_Dolichyl_32_diphosphate_c[c] + S_G00009_c[c]	(((AT1G32210)) or ((AT1G76400)) or ((AT5G66680)))	N-Glycan biosynthesis
S_H2O_c[c] + S_G00009_c[c] -> S_D_45_Glucose_c[c] + S_G00171_c[c]	(((AT1G24320)))	N-Glycan biosynthesis
4 S_H2O_c[c] + S_G00011_c[c] <=> 4 S_D_45_Mannose_c[c] + S_G00012_c[c]	(((AT1G30000)))	N-Glycan biosynthesis
S_UDP_45_N_45_acetyl_45_D_45_glucosamine_c[c] + S_G00012_c[c] <=> S_UDP_c[c] + S_G00013_c[c]	(((AT4G38240)))	N-Glycan biosynthesis
2 S_H2O_c[c] + S_G00013_c[c] -> 2 S_D_45_Mannose_c[c] + S_G00014_c[c]	(((AT5G14950)))	N-Glycan biosynthesis
S_H2O_c[c] + S_GM2_c[c] -> S_N_45_Acetyl_45_D_45_galactosamine_c[c] + S_GM3_c[c]	(((AT1G05590)) or ((AT3G55260)))	Glycosphingolipid biosynthesis - ganglioseries
S_GDP_45_L_45_fucose_c[c] + S_nLc5Cer_c[c] <=> S_GDP_c[c] + S_Type_32_II_32_B_32_antigen_c[c]	(((AT1G05570)) or ((AT1G11880)) or ((AT1G14070)) or ((AT1G14080)) or ((AT1G16900)) or ((AT1G71220)) or ((AT1G71990)) or ((AT1G78800)) or ((AT2G03210)) or ((AT2G13680)) or ((AT2G15350)) or ((AT2G15370)) or ((AT2G40190)) or ((AT2G44660)) or ((AT3G02350)) or ((AT3G25140)) or ((AT5G01220)) or ((AT5G02410)) or ((AT5G14850)) or ((AT5G22130)) or ((AT5G38460)))	Glycosphingolipid biosynthesis - neo-lactoseries
S_Dolichyl_32_phosphate_32_D_45_mannose_c[c] + S_G00006_c[c] -> S_Dolichyl_32_phosphate_c[c] + S_G10595_c[c]	(((AT1G05570)) or ((AT1G11880)) or ((AT1G14070)) or ((AT1G14080)) or ((AT1G16900)) or ((AT1G71220)) or ((AT1G71990)) or ((AT1G78800)) or ((AT2G03210)) or ((AT2G13680)) or ((AT2G15350)) or ((AT2G15370)) or ((AT2G40190)) or ((AT2G44660)) or ((AT3G02350)) or ((AT3G25140)) or ((AT5G01220)) or ((AT5G02410)) or ((AT5G14850)) or ((AT5G22130)) or ((AT5G38460)))	N-Glycan biosynthesis
S_Dolichyl_32_phosphate_32_D_45_mannose_c[c] + S_G10595_c[c] -> S_Dolichyl_32_phosphate_c[c] + S_G10596_c[c]	(((AT1G05570)) or ((AT1G11880)) or ((AT1G14070)) or ((AT1G14080)) or ((AT1G16900)) or ((AT1G71220)) or ((AT1G71990)) or ((AT1G78800)) or ((AT2G03210)) or ((AT2G13680)) or ((AT2G15350)) or ((AT2G15370)) or ((AT2G40190)) or ((AT2G44660)) or ((AT3G02350)) or ((AT3G25140)) or ((AT5G01220)) or ((AT5G02410)) or ((AT5G14850)) or ((AT5G22130)) or ((AT5G38460)))	N-Glycan biosynthesis
S_Dolichyl_32_phosphate_32_D_45_mannose_c[c] + S_G10597_c[c] -> S_Dolichyl_32_phosphate_c[c] + S_G00007_c[c]	(((AT1G05570)) or ((AT1G11880)) or ((AT1G14070)) or ((AT1G14080)) or ((AT1G16900)) or ((AT1G71220)) or ((AT1G71990)) or ((AT1G78800)) or ((AT2G03210)) or ((AT2G13680)) or ((AT2G15350)) or ((AT2G15370)) or ((AT2G40190)) or ((AT2G44660)) or ((AT3G02350)) or ((AT3G25140)) or ((AT5G01220)) or ((AT5G02410)) or ((AT5G14850)) or ((AT5G22130)) or ((AT5G38460)))	N-Glycan biosynthesis
S_G00007_c[c] + S_Dolichyl_32_D_45_glucosyl_32_phosphate_c[c] -> S_Dolichyl_32_phosphate_c[c] + S_G10598_c[c]	(((AT1G05570)) or ((AT1G11880)) or ((AT1G14070)) or ((AT1G14080)) or ((AT1G16900)) or ((AT1G71220)) or ((AT1G71990)) or ((AT1G78800)) or ((AT2G03210)) or ((AT2G13680)) or ((AT2G15350)) or ((AT2G15370)) or ((AT2G40190)) or ((AT2G44660)) or ((AT3G02350)) or ((AT3G25140)) or ((AT5G01220)) or ((AT5G02410)) or ((AT5G14850)) or ((AT5G22130)) or ((AT5G38460)))	N-Glycan biosynthesis
S_Dolichyl_32_D_45_glucosyl_32_phosphate_c[c] + S_G10598_c[c] -> S_Dolichyl_32_phosphate_c[c] + S_G10599_c[c]	(((AT1G05570)) or ((AT1G11880)) or ((AT1G14070)) or ((AT1G14080)) or ((AT1G16900)) or ((AT1G71220)) or ((AT1G71990)) or ((AT1G78800)) or ((AT2G03210)) or ((AT2G13680)) or ((AT2G15350)) or ((AT2G15370)) or ((AT2G40190)) or ((AT2G44660)) or ((AT3G02350)) or ((AT3G25140)) or ((AT5G01220)) or ((AT5G02410)) or ((AT5G14850)) or ((AT5G22130)) or ((AT5G38460)))	N-Glycan biosynthesis
S_Dolichyl_32_D_45_glucosyl_32_phosphate_c[c] + S_G10599_c[c] -> S_Dolichyl_32_phosphate_c[c] + S_G00008_c[c]	(((AT1G05570)) or ((AT1G11880)) or ((AT1G14070)) or ((AT1G14080)) or ((AT1G16900)) or ((AT1G71220)) or ((AT1G71990)) or ((AT1G78800)) or ((AT2G03210)) or ((AT2G13680)) or ((AT2G15350)) or ((AT2G15370)) or ((AT2G40190)) or ((AT2G44660)) or ((AT3G02350)) or ((AT3G25140)) or ((AT5G01220)) or ((AT5G02410)) or ((AT5G14850)) or ((AT5G22130)) or ((AT5G38460)))	N-Glycan biosynthesis
S_Acceptor_c[c] + S_2_45_Hydroxy_45_4_45_isopropenylcyclohexane_45_1_45_carboxyl_45_CoA_c[c] -> S_Reduced_32_acceptor_c[c] + S_4_45_Isopropenyl_45_2_45_oxy_45_cyclohexanecarboxyl_45_CoA_c[c]	(((AT1G18270)) or ((AT3G03330)) or ((AT4G05530)))	Limonene and pinene degradation
S_Reduced_32_acceptor_c[c] + S_alpha_45_Pinene_c[c] -> S_H2O_c[c] + S_Acceptor_c[c] + S_Myrtenol_c[c]	(((AT1G01190)) or ((AT1G01600)) or ((AT1G11600)) or ((AT1G11610)) or ((AT1G13090)) or ((AT1G13100)) or ((AT1G13710)) or ((AT2G30750)) or ((AT2G30770)) or ((AT3G10230)) or ((AT3G13730)) or ((AT3G26150)) or ((AT3G26160)) or ((AT3G26170)) or ((AT3G26190)) or ((AT3G26200)) or ((AT3G26210)) or ((AT3G26220)) or ((AT3G26230)) or ((AT3G26270)) or ((AT3G26280)) or ((AT3G26290)) or ((AT3G26300)) or ((AT3G2…	Limonene and pinene degradation
S_Oxygen_c[c] + S_Acceptor_c[c] + S_Myrtenol_c[c] -> 2 S_H2O_c[c] + S_Reduced_32_acceptor_c[c] + S_Myrtenal_c[c]	(((AT1G18270)) or ((AT3G03330)) or ((AT4G05530)))	Limonene and pinene degradation
S_Oxygen_c[c] + S_H_43__c[c] + S_alpha_45_Pinene_c[c] -> S_H2O_c[c] + S_Pinocarveol_c[c]	(((AT1G01190)) or ((AT1G01600)) or ((AT1G11600)) or ((AT1G11610)) or ((AT1G13090)) or ((AT1G13100)) or ((AT1G13710)) or ((AT2G30750)) or ((AT2G30770)) or ((AT3G10230)) or ((AT3G13730)) or ((AT3G26150)) or ((AT3G26160)) or ((AT3G26170)) or ((AT3G26190)) or ((AT3G26200)) or ((AT3G26210)) or ((AT3G26220)) or ((AT3G26230)) or ((AT3G26270)) or ((AT3G26280)) or ((AT3G26290)) or ((AT3G26300)) or ((AT3G2…	Limonene and pinene degradation
S_Pinocarveol_c[c] -> S_H_43__c[c] + S_Pinocarvone_c[c]	(((AT1G18270)) or ((AT3G03330)) or ((AT4G05530)))	Limonene and pinene degradation
S_NAD_43__c[c] + S_3_45_Hydroxy_45_2_44_6_45_dimethyl_45_5_45_methylene_45_heptanoyl_45_CoA_c[c] -> S_H_43__c[c] + S_NADH_c[c] + S_2_44_6_45_Dimethyl_45_5_45_methylene_45_3_45_oxo_45_heptanoyl_45_CoA_c[c]	(((AT1G18270)) or ((AT3G03330)) or ((AT4G05530)))	Limonene and pinene degradation
S_CoA_c[c] + S_2_44_6_45_Dimethyl_45_5_45_methylene_45_3_45_oxo_45_heptanoyl_45_CoA_c[c] -> S_Propanoyl_45_CoA_c[c] + S_3_45_Isopropylbut_45_3_45_enoyl_45_CoA_c[c]	(((AT4G31400)))	Limonene and pinene degradation
7 S_Isopentenyl_32_diphosphate_c[c] + S_trans_44_trans_44_cis_45_Geranylgeranyl_32_diphosphate_c[c] -> 7 S_Pyrophosphate_c[c] + S_di_45_trans_44_poly_45_cis_45_Undecaprenyl_32_diphosphate_c[c]	(((AT2G23410)) or ((AT5G58770)))	Terpenoid biosynthesis
S_Oxygen_c[c] + S_Reduced_32_acceptor_c[c] + S_Dihydroceramide_c[c] -> 2 S_H2O_c[c] + S_Acceptor_c[c] + S_N_45_Acylsphingosine_c[c]	(((AT1G01190)) or ((AT1G01600)) or ((AT1G11600)) or ((AT1G11610)) or ((AT1G13090)) or ((AT1G13100)) or ((AT1G13710)) or ((AT2G30750)) or ((AT2G30770)) or ((AT3G10230)) or ((AT3G13730)) or ((AT3G26150)) or ((AT3G26160)) or ((AT3G26170)) or ((AT3G26190)) or ((AT3G26200)) or ((AT3G26210)) or ((AT3G26220)) or ((AT3G26230)) or ((AT3G26270)) or ((AT3G26280)) or ((AT3G26290)) or ((AT3G26300)) or ((AT3G2…	Sphingolipid metabolism
2 S_NADP_43__c[c] + S_Pelargonidin_c[c] -> S_H_43__c[c] + 2 S_NADPH_c[c] + S(45)45_Epiafzelechin_c[c]	(((AT1G61720)))	Flavonoid biosynthesis
2 S_NADP_43__c[c] + S_Cyanidin_c[c] -> S_H_43__c[c] + 2 S_NADPH_c[c] + S(45)45_Epicatechin_c[c]	(((AT1G61720)))	Flavonoid biosynthesis
2 S_NADP_43__c[c] + S_Delphinidin_c[c] -> S_H_43__c[c] + 2 S_NADPH_c[c] + S(45)45_Epigallocatechin_c[c]	(((AT1G61720)))	Flavonoid biosynthesis
S_Tropine_c[c] -> S_Acetyltropine_c[c]	(((AT4G31400)))	Alkaloid biosynthesis II
S_Pseudotropine_c[c] -> S_Acetylpseudotropine_c[c]	(((AT4G31400)))	Alkaloid biosynthesis II
S_H2O_c[c] + S_Oxygen_c[c] + S_Cadaverine_c[c] -> S_NH3_c[c] + S_H2O2_c[c] + S_5_45_Aminopentanal_c[c]	(((AT2G42490)) or ((AT3G43670)) or ((AT4G14940)))	Alkaloid biosynthesis II
S_Benzene_45_1_44_2_44_4_45_triol_c[c] -> S_2_45_Hydroxy_45_1_44_4_45_benzoquinone_c[c]	(((AT1G18270)) or ((AT3G03330)) or ((AT4G05530)))	gamma-Hexachlorocyclohexane degradation
S_2_45_Hydroxy_45_1_44_4_45_benzoquinone_c[c] -> S_H2O_c[c] + S_p_45_Benzoquinone_c[c]	(((AT1G18270)) or ((AT3G03330)) or ((AT4G05530)))	gamma-Hexachlorocyclohexane degradation
S_S_45_Adenosyl_45_L_45_methionine_c[c] + S_2_45_Phytyl_45_1_44_4_45_naphthoquinone_c[c] -> S_S_45_Adenosyl_45_L_45_homocysteine_c[c] + S_Phylloquinone_c[c]	(((AT1G50000)) or ((AT2G19670)) or ((AT2G47420)) or ((AT3G13180)) or ((AT3G20020)) or ((AT3G27180)) or ((AT4G16570)) or ((AT4G29510)) or ((AT5G57300)) or ((AT5G66360)))	Ubiquinone biosynthesis
S_Diacylglycerol_c[c] + S_UDP_45_6_45_sulfoquinovose_c[c] -> S_UDP_c[c] + S_Sulfoquinovosyldiacylglycerol_c[c]	(((AT1G05570)) or ((AT1G11880)) or ((AT1G14070)) or ((AT1G14080)) or ((AT1G16900)) or ((AT1G71220)) or ((AT1G71990)) or ((AT1G78800)) or ((AT2G03210)) or ((AT2G13680)) or ((AT2G15350)) or ((AT2G15370)) or ((AT2G40190)) or ((AT2G44660)) or ((AT3G02350)) or ((AT3G25140)) or ((AT5G01220)) or ((AT5G02410)) or ((AT5G14850)) or ((AT5G22130)) or ((AT5G38460)))	Glycerolipid metabolism
S_sn_45_Glycerol_32_3_45_phosphate_c[c] + S_Acyl_45_CoA_c[c] -> S_CoA_c[c] + S_2_45_Acyl_45_sn_45_glycerol_32_3_45_phosphate_c[c]	(((AT4G31400)))	Glycerophospholipid metabolism
S_Naphthyl_45_2_45_hydroxymethyl_45_succinyl_32_CoA_c[c] -> 2 S_H_43__c[c] + S_Naphthyl_45_2_45_oxomethyl_45_succinyl_45_CoA_c[c]	(((AT1G18270)) or ((AT3G03330)) or ((AT4G05530)))	1- and 2-Methylnaphthalene degradation
S_CoA_c[c] + S_Naphthyl_45_2_45_oxomethyl_45_succinyl_45_CoA_c[c] -> S_Succinyl_45_CoA_c[c] + S_2_45_Naphthoyl_45_CoA_c[c]	(((AT4G31400)))	1- and 2-Methylnaphthalene degradation
S_cis_45_1_44_2_45_Dihydroxy_45_1_44_2_45_dihydro_45_8_45_carboxynaphthalene_c[c] -> S_1_44_2_45_Dihydroxy_45_8_45_carboxynaphthalene_c[c]	(((AT1G18270)) or ((AT3G03330)) or ((AT4G05530)))	1- and 2-Methylnaphthalene degradation
S_2_45_Hydroxyisophthalic_32_acid_c[c] -> S_CO2_c[c] + S_Salicylate_c[c]	(((AT4G09520)))	1- and 2-Methylnaphthalene degradation
S_H2O_c[c] + S_N_45_Cyclohexylformamide_c[c] -> S_Formate_c[c] + S_Cyclohexylamine_c[c]	(((AT3G02875)) or ((AT4G22330)) or ((AT5G56650)))	Caprolactam degradation
S_Neurosporene_c[c] -> S_alpha_45_Zeacarotene_c[c]	(((AT1G01190)) or ((AT1G01600)) or ((AT1G11600)) or ((AT1G11610)) or ((AT1G13090)) or ((AT1G13100)) or ((AT1G13710)) or ((AT2G30750)) or ((AT2G30770)) or ((AT3G10230)) or ((AT3G13730)) or ((AT3G26150)) or ((AT3G26160)) or ((AT3G26170)) or ((AT3G26190)) or ((AT3G26200)) or ((AT3G26210)) or ((AT3G26220)) or ((AT3G26230)) or ((AT3G26270)) or ((AT3G26280)) or ((AT3G26290)) or ((AT3G26300)) or ((AT3G2…	Biosynthesis of steroids
S_delta_45_Carotene_c[c] -> S_alpha_45_Carotene_c[c]	(((AT1G01190)) or ((AT1G01600)) or ((AT1G11600)) or ((AT1G11610)) or ((AT1G13090)) or ((AT1G13100)) or ((AT1G13710)) or ((AT2G30750)) or ((AT2G30770)) or ((AT3G10230)) or ((AT3G13730)) or ((AT3G26150)) or ((AT3G26160)) or ((AT3G26170)) or ((AT3G26190)) or ((AT3G26200)) or ((AT3G26210)) or ((AT3G26220)) or ((AT3G26230)) or ((AT3G26270)) or ((AT3G26280)) or ((AT3G26290)) or ((AT3G26300)) or ((AT3G2…	Biosynthesis of steroids
S_Lycopene_c[c] -> S_delta_45_Carotene_c[c]	(((AT1G01190)) or ((AT1G01600)) or ((AT1G11600)) or ((AT1G11610)) or ((AT1G13090)) or ((AT1G13100)) or ((AT1G13710)) or ((AT2G30750)) or ((AT2G30770)) or ((AT3G10230)) or ((AT3G13730)) or ((AT3G26150)) or ((AT3G26160)) or ((AT3G26170)) or ((AT3G26190)) or ((AT3G26200)) or ((AT3G26210)) or ((AT3G26220)) or ((AT3G26230)) or ((AT3G26270)) or ((AT3G26280)) or ((AT3G26290)) or ((AT3G26300)) or ((AT3G2…	Biosynthesis of steroids
S_gamma_45_Carotene_c[c] -> S_alpha_45_Carotene_c[c]	(((AT1G01190)) or ((AT1G01600)) or ((AT1G11600)) or ((AT1G11610)) or ((AT1G13090)) or ((AT1G13100)) or ((AT1G13710)) or ((AT2G30750)) or ((AT2G30770)) or ((AT3G10230)) or ((AT3G13730)) or ((AT3G26150)) or ((AT3G26160)) or ((AT3G26170)) or ((AT3G26190)) or ((AT3G26200)) or ((AT3G26210)) or ((AT3G26220)) or ((AT3G26230)) or ((AT3G26270)) or ((AT3G26280)) or ((AT3G26290)) or ((AT3G26300)) or ((AT3G2…	Biosynthesis of steroids
2 S_Glutathione_c[c] + S_5_40_S_41__45_HPETE_c[c] -> S_H2O_c[c] + S_Oxidized_32_glutathione_c[c] + S_5_40_S_41__45_HETE_c[c]	(((AT1G63460)) or ((AT2G25080)) or ((AT2G31570)) or ((AT2G48150)) or ((AT3G63080)) or ((AT4G11600)) or ((AT4G31870)))	Arachidonic acid metabolism
2 S_Glutathione_c[c] + S_15_40_S_41__45_HPETE_c[c] -> S_H2O_c[c] + S_Oxidized_32_glutathione_c[c] + S__40_15S_41__45_15_45_Hydroxy_45_5_44_8_44_11_45_cis_45_13_45_trans_45_eicosatetraenoate_c[c]	(((AT1G63460)) or ((AT2G25080)) or ((AT2G31570)) or ((AT2G48150)) or ((AT3G63080)) or ((AT4G11600)) or ((AT4G31870)))	Arachidonic acid metabolism
S_UDP_45_glucose_c[c] -> S_Cellulose_c[c] + S_UDP_c[c]	(((AT2G21770)) or ((AT2G25540)) or ((AT4G18780)) or ((AT4G32410)) or ((AT4G39350)) or ((AT5G05170)) or ((AT5G09870)) or ((AT5G17420)) or ((AT5G44030)) or ((AT5G64740)))	Starch and sucrose metabolism
S__40_R_41__45_3_45_Hydroxybutanoyl_45_CoA_c[c] -> S_CoA_c[c] + S_Poly_45_beta_45_hydroxybutyrate_c[c]	(((AT4G31400)))	Butanoate metabolism
S__40_R_41__45_3_45_Hydroxybutanoyl_45_CoA_m[m] -> S_CoA_m[m] + S_Poly_45_beta_45_hydroxybutyrate_m[m]	(((AT4G31400)))	Butanoate metabolism
S__40_R_41__45_3_45_Hydroxybutanoyl_45_CoA_p[d] -> S_CoA_p[d] + S_Poly_45_beta_45_hydroxybutyrate_p[d]	(((AT4G31400)))	Butanoate metabolism
S__40_R_41__45_3_45_Hydroxybutanoyl_45_CoA_x[x] -> S_CoA_x[x] + S_Poly_45_beta_45_hydroxybutyrate_x[x]	(((AT4G31400)))	Butanoate metabolism
S_ATP_c[c] + S_1_45_Phosphatidyl_45_D_45_myo_45_inositol_c[c] -> S_ADP_c[c] + S_1_45_Phosphatidyl_45_1D_45_myo_45_inositol_32_4_45_phosphate_c[c]	(((AT1G49340)))	Inositol phosphate metabolism; Phosphatidylinositol signaling system
S_Heme_32_O_c[c] -> S_Heme_32_A_c[c]	(((AT5G56090)))	Porphyrin and chlorophyll metabolism
S_ATP_c[c] -> S_Pyrophosphate_c[c] + S_3_39__44_5_39__45_Cyclic_32_AMP_c[c]	(((AT2G11890)))	Purine metabolism
S_H2O_c[c] + S_P1_44_P4_45_Bis_40_5_39__45_adenosyl_41__32_tetraphosphate_c[c] -> S_ATP_c[c] + S_AMP_c[c]	(((AT1G30110)) or ((AT3G10620)) or ((AT5G06340)))	Purine metabolism
S_GTP_c[c] -> S_Pyrophosphate_c[c] + S_3_39__44_5_39__45_Cyclic_32_GMP_c[c]	(((AT2G11890)))	Purine metabolism
S_H2O_c[c] + S_P1_44_P4_45_Bis_40_5_39__45_guanosyl_41__32_tetraphosphate_c[c] -> S_GTP_c[c] + S_GMP_c[c]	(((AT1G30110)) or ((AT3G10620)) or ((AT5G06340)))	Purine metabolism
S_Oxygen_c[c] + S_Isopentenyladenosine_45_5_39__45_triphosphate_c[c] + S_Reduced_32_flavoprotein_c[c] -> S_H2O_c[c] + S_Oxidized_32_flavoprotein_c[c] + S_trans_45_Zeatin_32_riboside_32_triphosphate_c[c]	(((AT1G67110)) or ((AT5G38450)))	Zeatin biosynthesis
S_Oxygen_c[c] + S_Isopnetenyladenosine_45_5_39__45_diphosphate_c[c] + S_Reduced_32_flavoprotein_c[c] -> S_H2O_c[c] + S_Oxidized_32_flavoprotein_c[c] + S_trans_45_Zeatin_32_riboside_32_diphosphate_c[c]	(((AT1G67110)) or ((AT5G38450)))	Zeatin biosynthesis
S_Oxygen_c[c] + S_Reduced_32_flavoprotein_c[c] + S_N6_45__40_delta2_45_Isopentenyl_41__45_adenosine_32_5_39__45_monophosphate_c[c] -> S_H2O_c[c] + S_Oxidized_32_flavoprotein_c[c] + S_trans_45_Zeatin_32_riboside_32__32_monophosphate_c[c]	(((AT1G67110)) or ((AT5G38450)))	Zeatin biosynthesis
S_H2O_c[c] + S_5_45_Fluoromuconolactone_c[c] -> S_2_45_Maleylacetate_c[c] + S_Hydrofluoric_32_acid_c[c]	(((AT2G32520)))	Fluorobenzoate degradation
S_H2O_c[c] + S_4_45_Fluoromuconolactone_c[c] -> S_2_45_Maleylacetate_c[c] + S_Hydrofluoric_32_acid_c[c]	(((AT2G32520)))	Fluorobenzoate degradation
S_Oxygen_c[c] + S_Reduced_32_acceptor_c[c] + S_Hexadecanoyl_45__91_acp_93__c[c] -> 2 S_H2O_c[c] + S_Acceptor_c[c] + S_Hexadecenoyl_45__91_acyl_45_carrier_32_protein_93__c[c]	(((AT1G43800)) or ((AT3G02610)) or ((AT3G02620)) or ((AT3G02630)) or ((AT5G16230)) or ((AT5G16240)))	Fatty acid biosynthesis
S_Oxygen_c[c] + S_H_43__c[c] + S_NADPH_c[c] + S_Tamoxifen_c[c] -> S_H2O_c[c] + S_NADP_43__c[c] + S_Tamoxifen_32_N_45_oxide_c[c]	(((AT1G12200)))	pathway not found
S_H2O_c[c] + S_Digalacturonate_c[c] -> 2 S_D_45_Galacturonate_c[c]	(((AT1G02790)) or ((AT3G07850)))	Pentose and glucuronate interconversions
S_Oxygen_c[c] + S_Reduced_32_acceptor_c[c] + S_Cathasterone_c[c] -> S_H2O_c[c] + S_Acceptor_c[c] + S_Teasterone_c[c]	(((AT5G05690)))	Brassinosteroid biosynthesis
S_Oxygen_c[c] + S_6_45_Deoxocathasterone_c[c] -> S_H2O_c[c] + S_6_45_Deoxoteasterone_c[c]	(((AT5G05690)))	Brassinosteroid biosynthesis
S_Sitosterol_c[c] -> S_Stigmasterol_c[c]	(((AT2G28850)) or ((AT2G28860)) or ((AT2G34490)) or ((AT2G34500)))	Biosynthesis of steroids
S_Oxygen_c[c] + 2 S_H_43__c[c] + 2 S_e_45__c[c] + S_Anthracene_c[c] -> S_Anthracene_45_9_44_10_45_dihydrodiol_c[c]	(((AT1G01190)) or ((AT1G01600)) or ((AT1G11600)) or ((AT1G11610)) or ((AT1G13090)) or ((AT1G13100)) or ((AT1G13710)) or ((AT2G30750)) or ((AT2G30770)) or ((AT3G26150)) or ((AT3G26160)) or ((AT3G26170)) or ((AT3G26190)) or ((AT3G26200)) or ((AT3G26210)) or ((AT3G26220)) or ((AT3G26230)) or ((AT3G26270)) or ((AT3G26280)) or ((AT3G26290)) or ((AT3G26300)) or ((AT3G26310)) or ((AT3G26320)) or ((AT3G2…	Naphthalene and anthracene degradation
S_Anthracene_45_9_44_10_45_dihydrodiol_c[c] -> 2 S_H_43__c[c] + S_9_44_10_45_Dihydroxyanthracene_c[c]	(((AT1G18270)) or ((AT3G03330)))	Naphthalene and anthracene degradation
S_Oxygen_c[c] + S_Phenylboronic_32_acid_c[c] -> S_H2O_c[c] + S_Phenol_c[c]	(((AT1G01190)) or ((AT1G01600)) or ((AT1G11600)) or ((AT1G11610)) or ((AT1G13090)) or ((AT1G13100)) or ((AT1G13710)) or ((AT2G30750)) or ((AT2G30770)) or ((AT3G26150)) or ((AT3G26160)) or ((AT3G26170)) or ((AT3G26190)) or ((AT3G26200)) or ((AT3G26210)) or ((AT3G26220)) or ((AT3G26230)) or ((AT3G26270)) or ((AT3G26280)) or ((AT3G26290)) or ((AT3G26300)) or ((AT3G26310)) or ((AT3G26320)) or ((AT3G2…	Naphthalene and anthracene degradation
S_Oxygen_c[c] + S_Aniline_c[c] -> S_NH3_c[c] + S_Catechol_c[c]	(((AT1G01190)) or ((AT1G01600)) or ((AT1G11600)) or ((AT1G11610)) or ((AT1G13090)) or ((AT1G13100)) or ((AT1G13710)) or ((AT2G30750)) or ((AT2G30770)) or ((AT3G26150)) or ((AT3G26160)) or ((AT3G26170)) or ((AT3G26190)) or ((AT3G26200)) or ((AT3G26210)) or ((AT3G26220)) or ((AT3G26230)) or ((AT3G26270)) or ((AT3G26280)) or ((AT3G26290)) or ((AT3G26300)) or ((AT3G26310)) or ((AT3G26320)) or ((AT3G2…	Naphthalene and anthracene degradation
S_Oxygen_c[c] + S_Nitrobenzene_c[c] -> S_Nitrite_c[c] + S_Catechol_c[c]	(((AT1G01190)) or ((AT1G01600)) or ((AT1G11600)) or ((AT1G11610)) or ((AT1G13090)) or ((AT1G13100)) or ((AT1G13710)) or ((AT2G30750)) or ((AT2G30770)) or ((AT3G26150)) or ((AT3G26160)) or ((AT3G26170)) or ((AT3G26190)) or ((AT3G26200)) or ((AT3G26210)) or ((AT3G26220)) or ((AT3G26230)) or ((AT3G26270)) or ((AT3G26280)) or ((AT3G26290)) or ((AT3G26300)) or ((AT3G26310)) or ((AT3G26320)) or ((AT3G2…	Naphthalene and anthracene degradation
S_H_43__c[c] + S_NADPH_c[c] + S_3_45_Oxostearoyl_45_CoA_c[c] -> S_NADP_43__c[c] + S_3_45_Hydroxyoctadecanoyl_45_CoA_c[c]	(((AT1G24360)) or ((AT1G63380)) or ((AT3G03980)) or ((AT3G04000)) or ((AT4G13180)))	Polyunsaturated fatty acid biosynthesis
S_Malonyl_45__91_acyl_45_carrier_32_protein_93__c[c] + S_Hexadecanoyl_45__91_acp_93__c[c] -> S_CO2_c[c] + S_3_45_Oxostearoyl_45__91_acp_93__c[c]	(((AT1G74960)) or ((AT2G04540)))	Fatty acid biosynthesis
S_H_43__c[c] + S_NADPH_c[c] + S_3_45_Oxostearoyl_45__91_acp_93__c[c] -> S_NADP_43__c[c] + S_3_45_Hydroxyoctadecanoyl_45__91_acp_93__c[c]	(((AT1G24360)) or ((AT1G63380)) or ((AT3G03980)) or ((AT3G04000)) or ((AT4G13180)))	Fatty acid biosynthesis; Polyunsaturated fatty acid biosynthesis
S_Octanoyl_45__91_acp_93__c[c] + S_Apoprotein_c[c] -> S_Protein_32_N6_45__40_octanoyl_41_lysine_c[c]	(((AT1G04640)) or ((AT4G31050)))	Lipoic acid metabolism
2 S_S_45_Adenosyl_45_L_45_methionine_c[c] + S_Protein_32_N6_45__40_octanoyl_41_lysine_c[c] -> 2 S_L_45_Methionine_c[c] + 2 S_5_39__45_Deoxyadenosine_c[c] + S_Protein_32_N6_45__40_lipoyl_41_lysine_c[c]	(((AT2G20860)) or ((AT5G08415)))	Lipoic acid metabolism
2 S_S_45_Adenosyl_45_L_45_methionine_c[c] + S_Octanoyl_45__91_acp_93__c[c] -> 2 S_L_45_Methionine_c[c] + 2 S_5_39__45_Deoxyadenosine_c[c] + S_Lipoyl_45__91_acp_93__c[c]	(((AT2G20860)) or ((AT5G08415)))	Lipoic acid metabolism
S_Apoprotein_c[c] + S_Lipoyl_45__91_acp_93__c[c] -> S_Protein_32_N6_45__40_lipoyl_41_lysine_c[c]	(((AT1G04640)) or ((AT4G31050)))	Lipoic acid metabolism
S_H2O_c[c] + S_G13033_c[c] -> S_N_45_Acetyl_45_D_45_galactosamine_c[c] + S_G08421_c[c]	(((AT1G05590)) or ((AT3G55260)))	Glycosaminoglycan degradation
S_H2O_c[c] + S_G06780_c[c] -> S_N_45_Acetyl_45_D_45_galactosamine_c[c] + S_G08421_c[c]	(((AT1G05590)) or ((AT3G55260)))	Glycosaminoglycan degradation
S_H2O_c[c] + S_G13038_c[c] -> S_N_45_Acetyl_45_D_45_glucosamine_c[c] + S_G13039_c[c]	(((AT5G13690)))	Glycosaminoglycan degradation
S_UDP_45_glucose_c[c] + S_Pelargonidin_32_3_45_O_45_glucoside_c[c] -> S_UDP_c[c] + S_Pelargonin_c[c]	(((AT4G14090)))	Anthocyanin biosynthesis
S_UDP_45_glucose_c[c] + S_Delphinidin_32_3_45_O_45_glucoside_c[c] -> S_UDP_c[c] + S_Delphin_c[c]	(((AT4G14090)))	Anthocyanin biosynthesis

## Sheet: Aramodel2015
Reaction	GPR	Subsystem
NAD_m0 + 1R_2S-1-Hydroxypropane-1_2_3-tricarboxylate_m0 -> CO2_m0 + NADH_m0 + 2-Oxoglutarate_m0	((AT3G09810.1.CDS) or (AT5G03290.1.CDS) or (AT1G32480.1.CDS))
Orthophosphate_d0 + NADP_d0 + D-Glyceraldehyde_3-phosphate_d0 -> H_d0 + NADPH_d0 + 3-Phospho-D-glyceroyl_phosphate_d0	((AT1G12900.1.CDS) or (AT1G12900.2.CDS) or (AT1G42970.1.CDS) or (AT3G62410.1.CDS) or (AT1G12900.3.CDS) or (AT1G76560.1.CDS) or (AT1G12900.4.CDS) or (AT2G47400.1.CDS) or (AT3G26650.1.CDS))
H_c0 + Thiamin_diphosphate_c0 + Pyruvate_c0 -> 2-alpha-Hydroxyethylthiamine_diphosphate_c0 + CO2_c0	((AT5G01330.1.CDS) or (AT1G59900.1.CDS) or (AT2G31810.1.CDS) or (AT1G30120.1.CDS) or (AT2G34590.1.CDS) or (AT2G31810.3.CDS) or (AT5G16290.1.CDS) or (AT5G16290.2.CDS) or (AT1G24180.1.CDS) or (AT2G31810.2.CDS) or (AT4G33070.1.CDS) or (AT3G48560.1.CDS) or (AT5G50850.1.CDS) or (AT5G54960.1.CDS) or (AT1G01090.1.CDS) or (AT5G01320.1.CDS))
3 S-Adenosyl-L-methionine_c0 -> 3 H_c0 + 3 5-Methylthioadenosine_c0 + Nicotianamine_c0	((AT1G56430.1.CDS) or (AT5G04950.1.CDS) or (AT5G56080.1.CDS) or (AT1G09240.1.CDS))
H2O_c0 + NAD_c0 -> 2 H_c0 + AMP_c0 + Nicotinamide_D-ribonucleotide_c0	((AT4G12720.2.CDS) or (AT4G25434.2.CDS) or (AT4G12720.1.CDS) or (AT5G20070.1.CDS) or (AT1G18300.1.CDS) or (AT5G47650.1.CDS) or (AT4G12720.3.CDS) or (AT4G12720.4.CDS) or (AT2G04450.1.CDS) or (AT4G25434.1.CDS))
ATP_c0 + UDP_c0 -> ADP_c0 + UTP_c0	((AT5G63310.1.CDS) or (AT4G11010.1.CDS) or (AT4G23895.2.CDS) or (AT4G23895.1.CDS) or (AT4G23895.3.CDS) or (AT4G09320.1.CDS) or (AT4G23900.1.CDS))
ATP_c0 + FMN_c0 -> cpd00012[c] + FAD_c0	((AT5G08340.1.CDS) or (AT5G03430.1.CDS) or (AT5G23330.1.CDS) or (AT5G08340.2.CDS))
Fe2_c0 + Protoporphyrin_c0 -> 2 H_c0 + Heme_c0	((AT2G30390.2.CDS) or (AT2G30390.1.CDS) or (AT5G26030.1.CDS) or (AT5G26030.2.CDS))
ATP_c0 + GDP_c0 -> ADP_c0 + GTP_c0	((AT5G63310.1.CDS) or (AT4G11010.1.CDS) or (AT4G23895.2.CDS) or (AT4G23895.1.CDS) or (AT4G23895.3.CDS) or (AT4G09320.1.CDS) or (AT4G23900.1.CDS))
2-Oxoglutarate_c0 + L-Aspartate_c0 -> L-Glutamate_c0 + Oxaloacetate_c0	((AT2G22250.3.CDS) or (AT4G31990.3.CDS) or (AT4G31990.4.CDS) or (AT1G62800.2.CDS) or (AT2G22250.1.CDS) or (AT5G19550.1.CDS) or (AT4G31990.1.CDS) or (AT5G11520.1.CDS) or (AT1G62800.1.CDS) or (AT2G22250.2.CDS) or (AT4G31990.2.CDS) or (AT2G30970.2.CDS) or (AT2G30970.1.CDS))
ATP_c0 + GTP_c0 -> 2 H_c0 + AMP_c0 + Guanosine_3-diphosphate_5-triphosphate_c0	((AT3G14050.1.CDS) or (AT3G17470.1.CDS) or (AT1G54130.1.CDS))
NADP_c0 + Glycolate_c0 -> H_c0 + NADPH_c0 + Glyoxylate_c0	(AT1G17650.1.CDS)
H2O_c0 + L-Asparagine_c0 -> NH3_c0 + L-Aspartate_c0	((AT5G08100.1.CDS) or (AT3G16150.1.CDS) or (AT5G08100.2.CDS))
ATP_c0 + CDP_c0 -> ADP_c0 + CTP_c0	((AT5G63310.1.CDS) or (AT4G11010.1.CDS) or (AT4G23895.2.CDS) or (AT4G23895.1.CDS) or (AT4G23895.3.CDS) or (AT4G09320.1.CDS) or (AT4G23900.1.CDS))
H2O_c0 + L-Methionine_c0 -> NH3_c0 + 2-Oxobutanoate_c0 + Methanethiol_c0	(AT1G64660.1.CDS)
2-Oxoglutarate_c0 + L-Tryptophan_c0 -> L-Glutamate_c0 + Indolepyruvate_c0	((AT1G23320.1.CDS) or (AT1G70560.1.CDS))
Pyruvate_c0 + L-Phenylalanine_c0 -> L-Alanine_c0 + Phenylpyruvate_c0	((AT1G23320.1.CDS) or (AT1G70560.1.CDS))
2-Oxoglutarate_c0 + L-Phenylalanine_c0 -> L-Glutamate_c0 + Phenylpyruvate_c0	((AT1G23320.1.CDS) or (AT1G62960.1.CDS) or (AT1G70560.1.CDS) or (AT5G53970.1.CDS) or (AT5G51690.1.CDS))
2-Oxoglutarate_c0 + L-Tyrosine_c0 -> L-Glutamate_c0 + 3-4-Hydroxyphenylpyruvate_c0	((AT4G31990.3.CDS) or (AT4G31990.4.CDS) or (AT1G71920.3.CDS) or (AT5G51690.1.CDS) or (AT2G22250.1.CDS) or (AT4G31990.1.CDS) or (AT5G11520.1.CDS) or (AT5G10330.1.CDS) or (AT5G10330.3.CDS) or (AT2G30970.2.CDS) or (AT2G22250.3.CDS) or (AT5G10330.2.CDS) or (AT2G24850.1.CDS) or (AT5G53970.1.CDS) or (AT1G71920.2.CDS) or (AT1G62800.2.CDS) or (AT5G19550.1.CDS) or (AT5G36160.1.CDS) or (AT1G71920.1.CDS) or…
H_c0 + L-Tyrosine_c0 -> CO2_c0 + Tyramine_c0	((AT4G28680.2.CDS) or (AT4G28680.3.CDS) or (AT4G28680.4.CDS) or (AT4G28680.1.CDS))
ATP_c0 + L-Glutamate_c0 + Tetrahydrofolate_c0 -> Orthophosphate_c0 + H_c0 + ADP_c0 + Tetrahydrofolyl-Glu2_c0	((AT3G55630.3.CDS) or (AT5G41480.1.CDS) or (AT3G10160.1.CDS) or (AT5G05980.2.CDS) or (AT5G05980.1.CDS) or (AT3G55630.1.CDS) or (AT3G55630.2.CDS))
L-Homocysteine_c0 + 5-Methyltetrahydrofolate_c0 -> L-Methionine_c0 + Tetrahydrofolate_c0	((AT5G17920.2.CDS) or (AT5G20980.1.CDS) or (AT5G20980.2.CDS) or (AT3G03780.3.CDS) or (AT3G03780.1.CDS) or (AT3G03780.2.CDS) or (AT5G17920.1.CDS))
H2O_c0 + ADP-glucose_c0 -> 2 H_c0 + AMP_c0 + D-Glucose_1-phosphate_c0	(AT4G11980.1.CDS)
ATP_c0 + Choline_c0 -> H_c0 + ADP_c0 + Choline_phosphate_c0	((AT4G09760.1.CDS) or (AT4G09760.2.CDS) or (AT1G71697.1.CDS) or (AT4G09760.3.CDS) or (AT1G74320.1.CDS))
Uracil_c0 + D-Ribose_5-phosphate_c0 -> H2O_c0 + Pseudouridine_5-phosphate_c0	(AT3G57150.1.CDS)
ATP_c0 + dADP_c0 -> ADP_c0 + dATP_c0	((AT5G63310.1.CDS) or (AT4G11010.1.CDS) or (AT4G23895.2.CDS) or (AT4G23895.1.CDS) or (AT4G23895.3.CDS) or (AT4G09320.1.CDS) or (AT4G23900.1.CDS))
UDP-D-galactose_c0 + myo-Inositol_c0 -> UDP_c0 + alpha-D-Galactosyl-1->3-1D-myo-inositol_c0	((AT1G56600.1.CDS) or (AT1G09350.1.CDS) or (AT5G23790.1.CDS) or (AT1G60470.1.CDS) or (AT2G47180.1.CDS))
H2O_c0 + Nicotinamide_c0 -> NH3_c0 + Nicotinate_c0	((AT1G08980.1.CDS) or (AT2G22570.1.CDS) or (AT2G22570.2.CDS) or (AT5G23230.1.CDS) or (AT3G16190.1.CDS) or (AT5G23220.1.CDS))
H2O_c0 + 2-Phosphoglycolate_c0 -> Orthophosphate_c0 + Glycolate_c0	((AT5G36790.1.CDS) or (AT5G36790.2.CDS) or (AT5G36790.3.CDS))
UDP-glucuronate_c0 -> UDP-D-galacturonate_c0	((AT4G30440.1.CDS) or (AT1G02000.1.CDS) or (AT4G00110.1.CDS) or (AT4G12250.1.CDS) or (AT2G45310.1.CDS) or (AT3G23820.1.CDS))
NADP_c0 + D-Glycerate_c0 -> H_c0 + NADPH_c0 + Hydroxypyruvate_c0	(AT1G17650.1.CDS)
NADP_d0 + D-Glycerate_d0 -> H_d0 + NADPH_d0 + Hydroxypyruvate_d0	(AT1G17650.1.CDS)
ATP_c0 + CoA_c0 + Benzoate_c0 -> cpd00012[c] + H_c0 + AMP_c0 + S-Benzoate_coenzyme_A_c0	((AT1G66120.1.CDS) or (AT1G65890.1.CDS) or (AT1G65880.1.CDS) or (AT1G68270.1.CDS))
ATP_d0 + CoA_d0 + Benzoate_d0 -> Diphosphate_d0 + H_d0 + AMP_d0 + S-Benzoate_coenzyme_A_d0	((AT1G66120.1.CDS) or (AT1G65890.1.CDS))
ATP_x0 + CoA_x0 + Benzoate_x0 -> H_x0 + Diphosphate_x0 + AMP_x0 + S-Benzoate_coenzyme_A_x0	((AT1G66120.1.CDS) or (AT1G65890.1.CDS))
UDP-L-arabinose_c0 -> UDP-D-xylose_c0	((AT2G34850.1.CDS) or (AT1G30620.2.CDS) or (AT4G20460.1.CDS) or (AT1G30620.1.CDS) or (AT1G30620.3.CDS) or (AT5G44480.1.CDS))
ATP_c0 + D-Ribulose_5-phosphate_c0 -> H_c0 + ADP_c0 + D-Ribulose_1_5-bisphosphate_c0	((AT1G76560.1.CDS) or (AT2G47400.1.CDS) or (AT3G62410.1.CDS) or (AT1G32060.1.CDS))
D-Arabinose_5-phosphate_c0 -> D-Ribulose_5-phosphate_c0	(AT3G54690.1.CDS)
NAD_c0 + 3-Hydroxypropanoate_c0 -> H_c0 + NADH_c0 + 3-Oxopropanoate_c0	(AT1G12570.1.CDS)
ATP_c0 + D-Xylulose_c0 -> H_c0 + ADP_c0 + D-Xylulose_5-phosphate_c0	((AT5G49650.2.CDS) or (AT2G21370.1.CDS) or (AT5G49650.1.CDS) or (AT2G21370.2.CDS))
ATP_d0 + D-Xylulose_d0 -> H_d0 + ADP_d0 + D-Xylulose_5-phosphate_d0	((AT2G21370.1.CDS) or (AT2G21370.2.CDS))
Chorismate_c0 -> Isochorismate_c0	((AT1G74710.2.CDS) or (AT1G74710.1.CDS) or (AT1G18870.2.CDS) or (AT1G18870.1.CDS))
ATP_c0 + dGDP_c0 -> ADP_c0 + dGTP_c0	((AT5G63310.1.CDS) or (AT4G11010.1.CDS) or (AT4G23895.2.CDS) or (AT4G23895.1.CDS) or (AT4G23895.3.CDS) or (AT4G09320.1.CDS) or (AT4G23900.1.CDS))
Geranyl_diphosphate_c0 -> cpd00012[c] + H_c0 + Myrcene_c0	((AT3G25830.1.CDS) or (AT3G25820.2.CDS) or (AT3G25810.1.CDS) or (AT2G24210.1.CDS) or (AT3G25820.1.CDS))
Geranyl_diphosphate_c0 -> cpd00012[c] + H_c0 + Terpinolene_c0	((AT3G25820.2.CDS) or (AT3G25820.1.CDS))
Geranyl_diphosphate_c0 -> cpd00012[c] + H_c0 + --Limonene_c0	((AT3G25820.2.CDS) or (AT3G25810.1.CDS) or (AT2G24210.1.CDS) or (AT3G25820.1.CDS))
Oxygen_c0 + 3_4-Dihydroxy-L-phenylalanine_c0 -> H_c0 + 4-L-Alanin-3-yl-2-hydroxy-cis_cis-muconate_6-semialdehyde_c0	(AT4G15093.1.CDS)
3-Phosphoadenylyl_sulfate_c0 + Quercetin_c0 -> H_c0 + Adenosine_3_5-bisphosphate_c0 + Quercetin_3-sulfate_c0	(AT3G45070.1.CDS)
Oxygen_c0 + 2-Oxoglutarate_c0 + Taxifolin_c0 -> H2O_c0 + H_c0 + CO2_c0 + Succinate_c0 + Quercetin_c0	((AT5G08640.2.CDS) or (AT5G63580.1.CDS) or (AT5G08640.1.CDS))
NADP_c0 + --Menthol_c0 -> H_c0 + NADPH_c0 + --Menthone_c0	((AT3G61220.2.CDS) or (AT3G61220.1.CDS))
H_c0 + NADPH_c0 + Progesterone_c0 -> NADP_c0 + 5beta-Pregnane-3_20-dione_c0	((AT4G24220.2.CDS) or (AT4G24220.1.CDS))
ATP_c0 + L-Glutamate_c0 + Dihydropteroate_c0 -> Orthophosphate_c0 + H_c0 + ADP_c0 + Dihydrofolate_c0	((AT3G55630.3.CDS) or (AT5G05980.2.CDS) or (AT5G05980.1.CDS) or (AT3G55630.1.CDS) or (AT3G55630.2.CDS))
NADP_c0 + Estradiol-17beta_c0 -> H_c0 + NADPH_c0 + Estrone_c0	(AT5G50600.1.CDS)
Tyramine_c0 + Feruloyl-CoA_c0 -> H_c0 + CoA_c0 + N-Feruloyltyramine_c0	(AT2G39020.1.CDS)
H2O_c0 + Pyridoxamine_phosphate_c0 -> Orthophosphate_c0 + Pyridoxamine_c0	(AT1G4040)
H_c0 + NADPH_c0 + Methylglyoxal_c0 -> NADP_c0 + Hydroxyacetone_c0	((AT2G24190.2.CDS) or (AT2G37760.1.CDS) or (AT2G37760.2.CDS) or (AT2G37770.2.CDS) or (AT1G54870.1.CDS) or (AT2G37760.3.CDS) or (AT2G24190.1.CDS) or (AT3G04000.1.CDS) or (AT2G37760.4.CDS) or (AT2G37760.5.CDS) or (AT2G37770.1.CDS))
NADP_c0 + -Neomenthol_c0 -> H_c0 + NADPH_c0 + --Menthone_c0	((AT3G61220.2.CDS) or (AT3G61220.1.CDS))
NADP_c0 + Cortisol_c0 -> H_c0 + NADPH_c0 + Cortisone_c0	(AT5G50600.1.CDS)
ATP_c0 + Sphinganine_c0 -> H_c0 + ADP_c0 + Sphinganine_1-phosphate_c0	((AT4G21534.1.CDS) or (AT4G21540.3.CDS) or (AT4G21540.1.CDS) or (AT4G21540.2.CDS))
Oxygen_c0 + 2-Oxoglutarate_c0 + Dihydrokaempferol_c0 -> H2O_c0 + H_c0 + CO2_c0 + Succinate_c0 + Kaempferol_c0	((AT5G08640.2.CDS) or (AT5G63580.1.CDS) or (AT5G08640.1.CDS) or (AT5G63590.1.CDS))
Hydroxymethylbilane_c0 -> H2O_c0 + Uroporphyrinogen_III_c0	(AT2G26540.1.CDS)
2 H_c0 + Oxygen_c0 + Coproporphyrinogen_III_c0 -> 2 H2O_c0 + 2 CO2_c0 + Protoporphyrinogen_IX_c0	((AT1G03475.1.CDS) or (AT4G03205.2.CDS) or (AT4G03205.1.CDS))
NADP_c0 + 8-1R_2R-3-Oxo-2-{Z-pent-2-enyl}cyclopentyloctanoate_c0 -> H_c0 + NADPH_c0 + 12-OPDA_c0	((AT1G76680.2.CDS) or (AT2G06050.3.CDS) or (AT2G06050.2.CDS) or (AT1G76680.1.CDS) or (AT2G06050.1.CDS))
NADP_x0 + 8-1R_2R-3-Oxo-2-{Z-pent-2-enyl}cyclopentyloctanoate_x0 -> NADPH_x0 + H_x0 + 12-OPDA_x0	((AT2G06050.3.CDS) or (AT2G06050.2.CDS) or (AT2G06050.1.CDS))
9Z_15Z-13S-12_13-Epoxyoctadeca-9_11_15-trienoic_acid_c0 -> 12-OPDA_c0	((AT3G25770.1.CDS) or (AT1G13280.1.CDS) or (AT3G25780.1.CDS) or (AT3G25760.1.CDS))
alpha-D-Galactosyl-1->3-1D-myo-inositol_c0 + Raffinose_c0 -> myo-Inositol_c0 + Stachyose_c0	(AT4G01970.1.CDS)
2-Amino-4-hydroxy-6-hydroxymethyl-7_8-dihydropteridine_c0 + Glycolaldehyde_c0 -> 2-Amino-4-hydroxy-6-D-erythro-1_2_3-trihydroxypropyl-7_8-dihydropteridine_c0	((AT3G11750.1.CDS) or (AT3G21730.2.CDS) or (AT3G21730.1.CDS) or (AT5G62980.1.CDS))
Cycloeucalenol_c0 -> Obtusifoliol_c0	((AT5G50375.1.CDS) or (AT5G50375.2.CDS))
Oxygen_c0 + 2-Oxoglutarate_c0 + Gibberellin_A20_c0 -> CO2_c0 + Succinate_c0 + Gibberellin_A29_c0	((AT1G78440.1.CDS) or (AT1G02400.1.CDS) or (AT2G34555.1.CDS) or (AT1G47990.1.CDS) or (AT1G30040.2.CDS) or (AT1G30040.1.CDS))
S-Methyl-5-thio-D-ribose_1-phosphate_c0 -> S-Methyl-5-thio-D-ribulose_1-phosphate_c0	((AT2G05830.3.CDS) or (AT2G05830.4.CDS) or (AT2G05830.1.CDS) or (AT2G05830.2.CDS))
H2O_c0 + UDP-3-O-3-hydroxytetradecanoyl-N-acetylglucosamine_c0 -> Acetate_c0 + UDP-3-O-3-hydroxytetradecanoyl-D-glucosamine_c0	((AT1G25054.1.CDS) or (AT1G25054.2.CDS) or (AT1G24880.1.CDS) or (AT1G24880.3.CDS) or (AT1G24793.1.CDS) or (AT1G24793.2.CDS) or (AT1G25210.1.CDS) or (AT1G25210.2.CDS) or (AT1G25145.1.CDS) or (AT1G24880.2.CDS))
Lipid_X_c0 + UDP-2_3-bis3-hydroxytetradecanoylglucosamine_c0 -> UDP_c0 + Lipid_A_disaccharide_c0	(AT2G04560.1.CDS)
ATP_c0 + Lipid_A_disaccharide_c0 -> H_c0 + ADP_c0 + 2_3_23-Tetrakis3-hydroxytetradecanoyl-D-glucosaminyl-1_6-beta-D-glucosamine_1_4-bisphosphate_c0	((AT3G20480.1.CDS) or (AT3G20480.2.CDS))
H2O_c0 + 3-Ketolactose_c0 -> beta-D-Glucose_c0 + 3-Keto-beta-D-galactose_c0	((AT4G35010.1.CDS) or (AT5G63800.1.CDS) or (AT5G56870.1.CDS) or (AT2G16730.1.CDS) or (AT1G31740.1.CDS) or (AT5G20710.1.CDS))
S-Adenosyl-L-methionine_c0 + --Jasmonic_acid_c0 -> S-Adenosyl-L-homocysteine_c0 + Methyl_jasmonate_c0	(AT1G19640.1.CDS)
Geranyl_diphosphate_c0 -> cpd00012[c] + H_c0 + --alpha-Pinene_c0	((AT3G25820.2.CDS) or (AT3G25810.1.CDS) or (AT3G25820.1.CDS))
Geranyl_diphosphate_c0 -> cpd00012[c] + H_c0 + --beta-Pinene_c0	((AT3G25820.2.CDS) or (AT3G25810.1.CDS) or (AT3G25820.1.CDS))
Geranyl_diphosphate_c0 -> cpd00012[c] + H_c0 + d-Limonene_c0	(AT3G25810.1.CDS)
H_c0 + Oxygen_c0 + NADPH_c0 + Kaur-16-en-18-oic_acid_c0 -> H2O_c0 + NADP_c0 + ent-7alpha-Hydroxykaur-16-en-19-oic_acid_c0	((AT1G05160.1.CDS) or (AT2G32440.1.CDS) or (AT2G32440.2.CDS))
H_r0 + NADPH_r0 + Oxygen_r0 + Kaur-16-en-18-oic_acid_r0 -> H2O_r0 + NADP_r0 + ent-7alpha-Hydroxykaur-16-en-19-oic_acid_r0	((AT1G05160.1.CDS) or (AT2G32440.1.CDS) or (AT2G32440.2.CDS))
H_c0 + Oxygen_c0 + NADPH_c0 + ent-7alpha-Hydroxykaur-16-en-19-oic_acid_c0 -> 2 H2O_c0 + NADP_c0 + Gibberellin_A12_aldehyde_c0	((AT1G05160.1.CDS) or (AT2G32440.1.CDS) or (AT2G32440.2.CDS))
H_r0 + NADPH_r0 + Oxygen_r0 + ent-7alpha-Hydroxykaur-16-en-19-oic_acid_r0 -> 2 H2O_r0 + NADP_r0 + Gibberellin_A12_aldehyde_r0	((AT1G05160.1.CDS) or (AT2G32440.1.CDS) or (AT2G32440.2.CDS))
Oxygen_c0 + NADPH_c0 + Gibberellin_A12_aldehyde_c0 -> H2O_c0 + NADP_c0 + Gibberellin_A12_c0	((AT1G05160.1.CDS) or (AT2G32440.1.CDS) or (AT2G32440.2.CDS))
NADPH_r0 + Oxygen_r0 + Gibberellin_A12_aldehyde_r0 -> H2O_r0 + NADP_r0 + Gibberellin_A12_r0	((AT1G05160.1.CDS) or (AT2G32440.1.CDS) or (AT2G32440.2.CDS))
Oxygen_c0 + 2-Oxoglutarate_c0 + Gibberellin_A9_c0 -> CO2_c0 + Succinate_c0 + Gibberellin_A51_c0	((AT1G78440.1.CDS) or (AT1G02400.1.CDS) or (AT2G34555.1.CDS) or (AT1G47990.1.CDS) or (AT1G30040.2.CDS) or (AT1G30040.1.CDS))
Oxygen_c0 + 2-Oxoglutarate_c0 + Gibberellin_A4_c0 -> CO2_c0 + Succinate_c0 + Gibberellin_A34_c0	((AT1G78440.1.CDS) or (AT1G02400.1.CDS) or (AT2G34555.1.CDS) or (AT1G47990.1.CDS) or (AT1G30040.2.CDS) or (AT1G30040.1.CDS))
--alpha-Terpineol_c0 -> 1_8-Cineole_c0	((AT3G25820.2.CDS) or (AT3G25820.1.CDS))
S-2_3-Epoxysqualene_c0 -> Lupeol_c0	((AT1G78970.2.CDS) or (AT1G78970.1.CDS) or (AT5G36150.1.CDS) or (AT1G78500.1.CDS))
S-2_3-Epoxysqualene_c0 -> beta-Amyrin_c0	((AT1G78970.2.CDS) or (AT1G78970.1.CDS) or (AT1G78960.1.CDS) or (AT5G36150.1.CDS) or (AT1G78955.1.CDS) or (AT1G78950.1.CDS) or (AT1G78500.1.CDS))
S-2_3-Epoxysqualene_c0 -> alpha-Amyrin_c0	((AT1G78960.1.CDS) or (AT1G78955.1.CDS))
H_c0 + Oxygen_c0 + NADPH_c0 + Sphinganine_c0 -> H2O_c0 + NADP_c0 + Phytosphingosine_c0	((AT1G69640.1.CDS) or (AT1G14290.1.CDS))
Lycopene_c0 -> delta-Carotene_c0	((AT5G12000.1.CDS) or (AT5G57030.1.CDS))
H_c0 + Oxygen_c0 + NADPH_c0 + Abscisate_c0 -> H2O_c0 + NADP_c0 + 8-Hydroxyabscisate_c0	((AT2G29090.1.CDS) or (AT4G19230.2.CDS) or (AT5G45340.2.CDS) or (AT4G19230.1.CDS) or (AT3G19270.1.CDS) or (AT5G45340.1.CDS) or (AT2G29090.2.CDS))
4-Hydroxybenzoate_c0 + all-trans-Nonaprenyl_diphosphate_c0 -> cpd00012[c] + H_c0 + 3-Nonaprenyl-4-hydroxybenzoate_c0	((AT4G23660.2.CDS) or (AT4G23660.1.CDS) or (AT4G23660.3.CDS))
S-Methyl-5-thio-D-ribulose_1-phosphate_c0 -> H2O_c0 + 2_3-Diketo-5-methylthiopentyl-1-phosphate_c0	((AT5G53850.1.CDS) or (AT5G53850.2.CDS) or (AT5G53850.3.CDS))
2_3-Diketo-5-methylthiopentyl-1-phosphate_c0 -> 2-Hydroxy-3-keto-5-methylthiopentenyl-1-phosphate_c0	((AT5G53850.1.CDS) or (AT5G53850.2.CDS) or (AT5G53850.3.CDS))
H2O_c0 + 2-Hydroxy-3-keto-5-methylthiopentenyl-1-phosphate_c0 -> Orthophosphate_c0 + 1_2-Dihydroxy-5-methylthiopent-1-en-3-one_c0	((AT5G53850.1.CDS) or (AT5G53850.2.CDS) or (AT5G53850.3.CDS))
Malonyl-acyl-carrier_protein_c0 + Butyryl-acp_c0 -> CO2_c0 + 3-Oxohexanoyl-acp_c0 + Acyl-carrier_protein_c0	((AT5G46290.2.CDS) or (AT5G46290.1.CDS) or (AT5G46290.3.CDS))
H_c0 + Malonyl-CoA_c0 + Acyl-carrier_protein_c0 -> CoA_c0 + Malonyl-acyl-carrier_protein_c0	((AT2G30200.1.CDS) or (AT2G30200.2.CDS))
Geranyl_diphosphate_c0 -> cpd00012[c] + H_c0 + Pinene_c0	(AT3G25810.1.CDS)
S-Adenosyl-L-methionine_c0 + Histone-L-lysine_c0 -> H_c0 + S-Adenosyl-L-homocysteine_c0 + Histone_N6-methyl-L-lysine_c0	(AT5G13960.1.CDS)
Peptidylproline_omega=180_c0 -> Peptidylproline_omega=0_c0	((AT3G56070.2.CDS) or (AT2G16600.1.CDS) or (AT3G56070.1.CDS) or (AT4G34870.1.CDS) or (AT4G38740.1.CDS) or (AT2G16600.2.CDS) or (AT2G18040.1.CDS))
UDP-3-O-3-hydroxytetradecanoyl-D-glucosamine_c0 + 3R-3-Hydroxytetradecanoyl-acyl-carrier_protein_c0 -> H_c0 + UDP-2_3-bis3-hydroxytetradecanoylglucosamine_c0 + Acyl-carrier_protein_c0	((AT4G21220.1.CDS) or (AT4G05210.1.CDS))
UDP-N-acetyl-D-glucosamine_c0 + 3R-3-Hydroxytetradecanoyl-acyl-carrier_protein_c0 -> UDP-3-O-3-hydroxytetradecanoyl-N-acetylglucosamine_c0 + Acyl-carrier_protein_c0	((AT4G29540.2.CDS) or (AT4G29540.1.CDS))
3R-3-Hydroxytetradecanoyl-acyl-carrier_protein_m0 + UDP-N-acetyl-D-glucosamine_m0 -> Acyl-carrier_protein_m0 + UDP-3-O-3-hydroxytetradecanoyl-N-acetylglucosamine_m0	((AT4G29540.2.CDS) or (AT4G29540.1.CDS))
H_c0 + UDP-glucose_c0 + Abscisate_c0 -> UDP_c0 + Abscisic_acid_glucose_ester_c0	((AT2G23260.1.CDS) or (AT4G34138.1.CDS) or (AT2G23250.1.CDS) or (AT1G05560.1.CDS) or (AT3G21780.1.CDS) or (AT1G05530.1.CDS))
2-Oxoglutarate_c0 + LL-2_6-Diaminoheptanedioate_c0 -> H2O_c0 + H_c0 + L-Glutamate_c0 + 2_3_4_5-Tetrahydrodipicolinate_c0	((AT4G33680.1.CDS) or (AT2G13810.1.CDS))
H2O_c0 + Geranyl_diphosphate_c0 -> cpd00012[c] + H_c0 + -Linalool_c0	((AT1G61680.2.CDS) or (AT1G61680.1.CDS))
delta-Carotene_c0 -> epsilon-Carotene_c0	(AT5G12000.1.CDS)
S-Dihydroorotate_c0 + Ubiquinone-8_c0 -> Orotate_c0 + ubiquinol8_c0	(AT5G23300.1.CDS)
trans_trans-Farnesyl_diphosphate_c0 -> cpd00012[c] + H_c0 + Humulene_c0	((AT5G23960.1.CDS) or (AT5G23960.2.CDS))
trans_trans-Farnesyl_diphosphate_c0 -> cpd00012[c] + H_c0 + beta-Caryophyllene_c0	((AT5G23960.1.CDS) or (AT5G23960.2.CDS))
2-2-Methylthioethylmalic_acid_c0 -> 3-2-Methylthioethylmalic_acid_c0	((AT4G13430.1.CDS) or (AT3G58990.1.CDS) or (AT2G43100.1.CDS))
2-2-Methylthioethylmalic_acid_d0 -> 3-2-Methylthioethylmalic_acid_d0	((AT4G13430.1.CDS) or (AT3G58990.1.CDS) or (AT2G43100.1.CDS))
2-6-Methylthiohexylmalic_acid_c0 -> 3-6-Methylthiohexylmalic_acid_c0	((AT4G13430.1.CDS) or (AT3G58990.1.CDS) or (AT2G43100.1.CDS))
2-6-Methylthiohexylmalic_acid_d0 -> 3-6-Methylthiohexylmalic_acid_d0	((AT4G13430.1.CDS) or (AT3G58990.1.CDS) or (AT2G43100.1.CDS))
2-4-Methylthiobutylmalic_acid_c0 -> 3-4-Methylthiobutylmalic_acid_c0	((AT4G13430.1.CDS) or (AT3G58990.1.CDS) or (AT2G43100.1.CDS))
2-4-Methylthiobutylmalic_acid_d0 -> 3-4-Methylthiobutylmalic_acid_d0	((AT4G13430.1.CDS) or (AT3G58990.1.CDS) or (AT2G43100.1.CDS))
H_c0 + UDP-glucose_c0 + 4-Methylthiobutylthiohydroximate_c0 -> UDP_c0 + 3-Methylthiopropyl-desulfoglucosinolate_c0	(AT2G31790.1.CDS)
Oxygen_c0 + NADPH_c0 + Tryptamine_c0 -> H2O_c0 + NADP_c0 + N-Hydroxyl-tryptamine_c0	((AT5G43890.1.CDS) or (AT5G11320.2.CDS) or (AT1G48910.1.CDS) or (AT1G04610.1.CDS) or (AT4G28720.1.CDS) or (AT5G25620.2.CDS) or (AT1G04180.1.CDS) or (AT5G25620.1.CDS) or (AT1G21430.1.CDS) or (AT5G11320.1.CDS) or (AT2G33230.1.CDS))
2-7-Methylthioheptylmalic_acid_c0 -> 3-7-Methylthioheptylmalic_acid_c0	((AT4G13430.1.CDS) or (AT3G58990.1.CDS) or (AT2G43100.1.CDS))
2-7-Methylthioheptylmalic_acid_d0 -> 3-7-Methylthioheptylmalic_acid_d0	((AT4G13430.1.CDS) or (AT3G58990.1.CDS) or (AT2G43100.1.CDS))
trans_trans-Farnesyl_diphosphate_c0 -> cpd00012[c] + H_c0 + beta-Farnesene_c0	(AT5G44630.1.CDS)
2-3-Methylthiopropylmalic_acid_c0 -> 3-3-Methylthiopropylmalic_acid_c0	((AT4G13430.1.CDS) or (AT3G58990.1.CDS) or (AT2G43100.1.CDS))
2-3-Methylthiopropylmalic_acid_d0 -> 3-3-Methylthiopropylmalic_acid_d0	((AT4G13430.1.CDS) or (AT3G58990.1.CDS) or (AT2G43100.1.CDS))
2-5-Methylthiopentylmalic_acid_c0 -> 3-5-Methylthiopentylmalic_acid_c0	((AT4G13430.1.CDS) or (AT3G58990.1.CDS) or (AT2G43100.1.CDS))
2-5-Methylthiopentylmalic_acid_d0 -> 3-5-Methylthiopentylmalic_acid_d0	((AT4G13430.1.CDS) or (AT3G58990.1.CDS) or (AT2G43100.1.CDS))
trans_trans-Farnesyl_diphosphate_c0 -> cpd00012[c] + H_c0 + alpha-Farnesene_c0	((AT4G16740.2.CDS) or (AT4G16740.1.CDS))
H2O_c0 + alpha-Maltose_c0 -> 2 alpha-D-Glucose_c0	((AT3G23640.2.CDS) or (AT3G23640.1.CDS))
2 1-O-Sinapoyl-beta-D-glucose_c0 -> beta-D-Glucose_c0 + 1_2-Bis-O-sinapoyl-beta-D-glucoside_c0	((AT2G22990.6.CDS) or (AT2G22990.1.CDS) or (AT2G22990.3.CDS) or (AT2G22990.5.CDS) or (AT2G22980.1.CDS) or (AT2G22990.2.CDS) or (AT2G23010.2.CDS) or (AT2G22980.4.CDS) or (AT2G23010.1.CDS) or (AT2G22990.4.CDS) or (AT2G22980.2.CDS) or (AT2G22980.3.CDS))
H_c0 + 2 Pyruvate_c0 -> CO2_c0 + S-2-Acetolactate_c0	((AT2G31810.2.CDS) or (AT3G48560.1.CDS) or (AT2G31810.3.CDS) or (AT2G31810.1.CDS) or (AT5G16290.1.CDS) or (AT5G16290.2.CDS))
H2O_c0 + Melibiose_c0 -> beta-D-Glucose_c0 + alpha-D-Galactose_c0	((AT3G56310.2.CDS) or (AT3G56310.1.CDS) or (AT5G08380.1.CDS) or (AT5G08370.2.CDS) or (AT5G08370.1.CDS))
H2O_w0 + Melibiose_w0 -> alpha-D-Galactose_w0 + beta-D-Glucose_w0	((AT5G08370.2.CDS) or (AT5G08370.1.CDS))
H2O_c0 + Raffinose_c0 -> Sucrose_c0 + alpha-D-Galactose_c0	((AT3G57520.3.CDS) or (AT3G57520.2.CDS) or (AT3G57520.1.CDS))
H2O_c0 + Nicotinamide-beta-riboside_c0 -> H_c0 + Nicotinamide_c0 + beta-D-Ribofuranose_c0	(AT5G18860.1.CDS)
H2O_w0 + Nicotinamide-beta-riboside_w0 -> H_w0 + Nicotinamide_w0 + beta-D-Ribofuranose_w0	(AT5G18860.1.CDS)
ATP_c0 + beta-D-Glucopyranuronic_acid_c0 -> H_c0 + ADP_c0 + D-Glucuronate_1-phosphate_c0	((AT5G14470.1.CDS) or (AT3G01640.1.CDS))
H2O_c0 + Inosine_c0 -> Hypoxanthine_c0 + beta-D-Ribofuranose_c0	((AT5G18860.1.CDS) or (AT1G05620.1.CDS) or (AT2G36310.1.CDS) or (AT1G05620.2.CDS))
UDP-glucose_c0 + alpha-D-Glucose_6-phosphate_c0 -> UDP_c0 + alpha_alpha-Trehalose_6-phosphate_c0	((AT1G16980.1.CDS) or (AT1G68020.2.CDS) or (AT1G68020.1.CDS) or (AT1G78580.1.CDS) or (AT1G70290.1.CDS) or (AT4G27550.1.CDS) or (AT2G18700.1.CDS) or (AT4G17770.1.CDS) or (AT1G23870.1.CDS) or (AT1G17000.1.CDS) or (AT1G60140.1.CDS) or (AT1G06410.1.CDS))
ATP_c0 + beta-D-Fructose_c0 -> H_c0 + ADP_c0 + beta-D-Fructose_6-phosphate_c0	((AT2G19860.2.CDS) or (AT1G66430.1.CDS) or (AT1G50390.1.CDS) or (AT1G06020.1.CDS) or (AT4G10260.1.CDS) or (AT3G20040.1.CDS) or (AT2G31390.1.CDS) or (AT5G51830.1.CDS) or (AT4G29130.1.CDS) or (AT1G50460.1.CDS) or (AT2G19860.1.CDS) or (AT3G59480.1.CDS) or (AT1G06030.1.CDS))
3 p-Coumaroyl-CoA_c0 + Spermidine_c0 -> 3 H_c0 + 3 CoA_c0 + N1_N5_N10-Tricoumaroyl_spermidine_c0	(AT2G19070.1.CDS)
UDP-L-arabinose_c0 -> UDP-L-arabinofuranose_c0	((AT5G15650.1.CDS) or (AT3G08900.1.CDS) or (AT3G02230.1.CDS))
UDP-L-arabinose_w0 -> UDP-L-arabinofuranose_w0	(AT5G15650.1.CDS)
H_c0 + NADPH_c0 + Red_chlorophyll_catabolite_c0 -> NADP_c0 + Primary_fluorescent_chlorophyll_catabolite_c0	(AT4G37000.1.CDS)
H_m0 + NADPH_m0 + Red_chlorophyll_catabolite_m0 -> NADP_m0 + Primary_fluorescent_chlorophyll_catabolite_m0	(AT4G37000.1.CDS)
Pyruvate_c0 + L-Tyrosine_c0 -> L-Alanine_c0 + 3-4-Hydroxyphenylpyruvate_c0	((AT1G23320.1.CDS) or (AT1G70560.1.CDS))
H_c0 + Oxygen_c0 + NADPH_c0 + Hexadecanoic_acid_c0 -> H2O_c0 + NADP_c0 + 16-Hydroxypalmitate_c0	((AT2G45970.1.CDS) or (AT2G27690.1.CDS) or (AT4G00360.1.CDS) or (AT1G01600.1.CDS))
H_c0 + Oxygen_c0 + NADPH_c0 + cis-9_10-Epoxystearic_acid_c0 -> H2O_c0 + NADP_c0 + 9_10-Epoxy-18-hydroxystearate_c0	((AT2G45970.1.CDS) or (AT2G27690.1.CDS) or (AT4G00360.1.CDS) or (AT1G01600.1.CDS))
H_r0 + NADPH_r0 + Oxygen_r0 + cis-9_10-Epoxystearic_acid_r0 -> H2O_r0 + NADP_r0 + 9_10-Epoxy-18-hydroxystearate_r0	(AT4G00360.1.CDS)
H_c0 + Oxygen_c0 + NADPH_c0 + 16-Hydroxypalmitate_c0 -> H2O_c0 + NADP_c0 + 10_16-Dihydroxyhexadecanoic_acid_c0	(AT3G10570.1.CDS)
H_c0 + Oxygen_c0 + NADPH_c0 + 9R_10R-Dihydroxyoctadecanoic_acid_c0 -> H2O_c0 + NADP_c0 + 9_10_18-Trihydroxystearate_c0	((AT2G45970.1.CDS) or (AT2G27690.1.CDS) or (AT4G00360.1.CDS) or (AT1G01600.1.CDS))
H_r0 + NADPH_r0 + Oxygen_r0 + 9R_10R-Dihydroxyoctadecanoic_acid_r0 -> H2O_r0 + NADP_r0 + 9_10_18-Trihydroxystearate_r0	(AT4G00360.1.CDS)
trans_trans-Farnesyl_diphosphate_c0 -> cpd00012[c] + H_c0 + Zingiberene_c0	(AT5G44630.1.CDS)
H2O_c0 + Oxygen_c0 + Farnesylcysteine_c0 -> Hydrogen_peroxide_c0 + L-Cysteine_c0 + 2-trans_6-trans-Farnesal_c0	(AT5G63910.1.CDS)
Oxygen_c0 + NADPH_c0 + L-Phenylalanine_c0 -> H2O_c0 + NADP_c0 + N-Hydroxy-L-phenylalanine_c0	(AT5G05260.1.CDS)
H_c0 + Oxygen_c0 + NADPH_c0 + N-Hydroxy-L-phenylalanine_c0 -> H2O_c0 + NADP_c0 + N_N-Dihydroxy-L-phenylalanine_c0	(AT5G05260.1.CDS)
trans_trans-Farnesyl_diphosphate_c0 -> cpd00012[c] + H_c0 + -alpha-Barbatene_c0	(AT5G44630.1.CDS)
trans_trans-Farnesyl_diphosphate_c0 -> cpd00012[c] + H_c0 + gamma-Bisabolene_c0	((AT4G13280.1.CDS) or (AT4G13300.1.CDS))
trans_trans-Farnesyl_diphosphate_c0 -> cpd00012[c] + H_c0 + beta-Bisabolene_c0	(AT5G44630.1.CDS)
Acetyl-CoA_c0 + 3-Hexenol_c0 -> CoA_c0 + Z-3-Hexen-1-ol_acetate_c0	(AT3G03480.1.CDS)
9_15_9-tricis-zeta-Carotene_c0 -> 9_9-dicis-zeta-Carotene_c0	((AT1G10830.2.CDS) or (AT1G10830.1.CDS))
S-2_3-Epoxysqualene_c0 -> Thalianol_c0	((AT5G48010.2.CDS) or (AT5G48010.1.CDS))
ATP_c0 + Molybdopterin_c0 -> cpd00012[c] + Adenylated_molybdopterin_c0	(AT5G20990.1.CDS)
Adenylated_molybdopterin_c0 + Molybdate_c0 -> H2O_c0 + H_c0 + AMP_c0 + Molybdoenzyme_molybdenum_cofactor_c0	(AT5G20990.1.CDS)
CTP_c0 + 2-trans_6-trans-Farnesol_c0 -> H_c0 + CDP_c0 + trans_trans-Farnesyl_phosphate_c0	(AT5G58560.1.CDS)
H2O_c0 + Bis5-adenosyl_pentaphosphate_c0 -> H_c0 + AMP_c0 + Adenosine_tetraphosphate_c0	((AT5G06340.1.CDS) or (AT3G26690.2.CDS) or (AT3G10620.1.CDS) or (AT3G26690.1.CDS))
H2O_d0 + Bis5-adenosyl_pentaphosphate_d0 -> H_d0 + AMP_d0 + Adenosine_tetraphosphate_d0	((AT5G06340.1.CDS) or (AT3G26690.2.CDS) or (AT3G10620.1.CDS) or (AT3G26690.1.CDS))
trans_trans-Farnesyl_diphosphate_c0 -> cpd00012[c] + H_c0 + --alpha-Cuprenene_c0	(AT5G44630.1.CDS)
S-2_3-Epoxysqualene_c0 -> Baruol_c0	(AT4G15370.1.CDS)
Geranyl_diphosphate_c0 -> cpd00012[c] + H_c0 + E-beta-Ocimene_c0	((AT3G25830.1.CDS) or (AT3G25820.2.CDS) or (AT3G25810.1.CDS) or (AT2G24210.1.CDS) or (AT3G25820.1.CDS) or (AT4G16740.2.CDS) or (AT4G16740.1.CDS))
trans_trans-Farnesyl_diphosphate_c0 -> cpd00012[c] + H_c0 + beta-Sesquiphellandrene_c0	(AT5G44630.1.CDS)
H2O_c0 + Methyl-2-alpha-L-fucopyranosyl-beta-D-galactoside_c0 -> Methyl_beta-D-galactoside_c0 + L-FUCOSE_c0	(AT4G34260.1.CDS)
S-Adenosyl-L-methionine_r0 + 24-Methylenelophenol_r0 -> H_r0 + S-Adenosyl-L-homocysteine_r0 + 24-Ethylidenelophenol_r0	((AT1G20330.1.CDS) or (AT1G76090.1.CDS))
GnGn-GP_c0 + GDP-beta-L-fucose_c0 -> GDP_c0 + N4-{N-acetyl-beta-D-glucosaminyl-1_2-alpha-D-mannosyl-1_3-N-acetyl-beta-D-glucosaminyl-1_2-alpha-D-mannosyl-1_6-beta-D-mannosyl-1_4-N-acetyl-beta-D-glucosaminyl-1_4-alpha-L-fucosyl-1_3-N-acetyl-beta-D-glucosaminyl}asparagine_c0	(AT3G19280.1.CDS)
H_c0 + GDP-mannose_c0 + DOLICHOLP_c0 -> GDP_c0 + CPD-171_c0	((AT1G48140.1.CDS) or (AT1G48140.2.CDS) or (AT1G20575.1.CDS) or (AT1G74340.1.CDS))
UDP-D-xylose_c0 + GnGn-GP_c0 -> UDP_c0 + GnGnX-GP_c0	(AT5G55500.1.CDS)
UDP-D-xylose_g0 + GnGn-GP_g0 -> UDP_g0 + GnGnX-GP_g0	(AT5G55500.1.CDS)
4-Hydroxybenzoate_m0 + all-trans-Nonaprenyl_diphosphate_m0 -> H_m0 + Diphosphate_m0 + 3-Nonaprenyl-4-hydroxybenzoate_m0	((AT4G23660.2.CDS) or (AT4G23660.1.CDS) or (AT4G23660.3.CDS))
GTP_c0 + L-Fucose_1-phosphate_c0 -> cpd00012[c] + GUANOSINE_DIPHOSPHATE_FUCOSE_c0	(AT1G01220.1.CDS)
H2O_c0 + ATP_c0 + Docosanoyl-CoA_c0 -> Orthophosphate_c0 + H_c0 + ADP_c0 + Docosanoyl-CoA_x0	((AT4G39850.2.CDS) or (AT4G39850.3.CDS) or (AT4G39850.1.CDS) or (AT1G54350.1.CDS))
H2O_c0 + ATP_c0 + Palmitoyl-CoA_c0 -> Orthophosphate_c0 + H_c0 + ADP_c0 + Palmitoyl-CoA_x0	((AT4G39850.2.CDS) or (AT4G39850.3.CDS) or (AT4G39850.1.CDS) or (AT1G54350.1.CDS))
H2O_c0 + ATP_c0 + Stearoyl-CoA_c0 -> Orthophosphate_c0 + H_c0 + ADP_c0 + Stearoyl-CoA_x0	((AT4G39850.2.CDS) or (AT4G39850.3.CDS) or (AT4G39850.1.CDS) or (AT1G54350.1.CDS))
H2O_c0 + ATP_c0 + Tetradecanoyl-CoA_c0 -> Orthophosphate_c0 + H_c0 + ADP_c0 + Tetradecanoyl-CoA_x0	((AT4G39850.2.CDS) or (AT4G39850.3.CDS) or (AT4G39850.1.CDS) or (AT1G54350.1.CDS))
H_c0 + Pyruvate_c0 + 2-Oxobutanoate_c0 -> CO2_c0 + 2-Aceto-2-hydroxybutanoate_c0	((AT2G31810.2.CDS) or (AT3G48560.1.CDS) or (AT2G31810.3.CDS) or (AT2G31810.1.CDS) or (AT5G16290.1.CDS) or (AT5G16290.2.CDS))
H2O_d0 + Adenylyl_sulfate_d0 -> 2 H_d0 + AMP_d0 + Sulfate_d0	(AT3G56490.1.CDS)
H2O_w0 + Adenylyl_sulfate_w0 -> 2 H_w0 + AMP_w0 + Sulfate_w0	(AT3G56490.1.CDS)
H2O_x0 + Adenylyl_sulfate_x0 -> 2 H_x0 + Sulfate_x0 + AMP_x0	((AT5G01310.1.CDS) or (AT5G48545.1.CDS) or (AT5G58240.2.CDS) or (AT4G16566.1.CDS) or (AT3G56490.1.CDS) or (AT5G58240.1.CDS))
H_c0 + NADPH_c0 + E-2-penten-1-al_c0 -> NADP_c0 + E-2-pentenol_c0	((AT2G24190.2.CDS) or (AT3G61220.2.CDS) or (AT2G37770.2.CDS) or (AT1G54870.1.CDS) or (AT2G24190.1.CDS) or (AT3G61220.1.CDS) or (AT3G04000.1.CDS) or (AT2G37770.1.CDS))
H_c0 + NADPH_c0 + E-2-Hexenal_c0 -> NADP_c0 + trans-2-hexenol_c0	((AT2G24190.2.CDS) or (AT3G61220.2.CDS) or (AT2G37770.2.CDS) or (AT1G54870.1.CDS) or (AT2G24190.1.CDS) or (AT3G61220.1.CDS) or (AT3G04000.1.CDS) or (AT2G37770.1.CDS))
9Z_15Z-13S-12_13-Epoxyoctadeca-9_11_15-trienoic_acid_d0 -> 12-OPDA_d0	((AT3G25770.1.CDS) or (AT1G13280.1.CDS) or (AT3G25780.1.CDS) or (AT3G25760.1.CDS))
CTP_d0 + dipalmitoyl_phosphatidate_d0 -> Diphosphate_d0 + CDP-1_2-dipalmitoylglycerol_d0	((AT2G45150.2.CDS) or (AT4G26770.1.CDS) or (AT2G45150.1.CDS) or (AT4G22340.2.CDS) or (AT3G60620.1.CDS) or (AT1G62430.1.CDS) or (AT2G45150.3.CDS) or (AT4G22340.1.CDS) or (AT4G22340.3.CDS))
4 H_m0 + Oxygen_m0 + 4 Cytochromes-C-Reduced_m0 -> 2 H2O_m0 + 4 Cytochromes-C-Oxidized_m0	((ATMG00160.1.CDS) or (AT4G37830.1.CDS) or (AT1G22450.1.CDS) or (AT1G80230.1.CDS) or (AT5G61310.1.CDS) or (ATMG01360.1.CDS) or (AT5G61310.4.CDS) or (ATMG01280.1.CDS) or (AT2G07695.1.CDS) or (AT2G07687.1.CDS) or (AT5G61310.2.CDS) or (AT5G40382.1.CDS) or (AT3G15640.1.CDS) or (ATMG00730.1.CDS) or (AT2G47380.1.CDS) or (AT3G15640.2.CDS) or (AT4G37830.2.CDS) or (AT4G28060.1.CDS) or (AT5G61310.3.CDS))
ATP_d0 + L-Glutamate_d0 + Dihydropteroate_d0 -> Orthophosphate_d0 + H_d0 + ADP_d0 + Dihydrofolate_d0	((AT5G05980.2.CDS) or (AT5G05980.1.CDS))
ATP_m0 + L-Glutamate_m0 + Dihydropteroate_m0 -> H_m0 + ADP_m0 + Orthophosphate_m0 + Dihydrofolate_m0	((AT3G55630.3.CDS) or (AT5G41480.1.CDS) or (AT3G10160.1.CDS) or (AT5G05980.2.CDS) or (AT5G05980.1.CDS) or (AT3G55630.1.CDS) or (AT3G55630.2.CDS))
NADP_d0 + 2-C-Methyl-D-erythritol_4-phosphate_d0 -> H_d0 + NADPH_d0 + 1-Deoxy-D-xylulose_5-phosphate_d0	((AT5G62790.2.CDS) or (AT1G11990.1.CDS) or (AT1G62330.1.CDS) or (AT5G62790.1.CDS))
Isopentenyl_diphosphate_d0 + trans_trans-Farnesyl_diphosphate_d0 -> Diphosphate_d0 + H_d0 + Geranylgeranyl_diphosphate_d0	((AT2G18640.1.CDS) or (AT3G14530.1.CDS) or (AT3G14510.1.CDS) or (AT1G49530.1.CDS) or (AT4G38460.1.CDS) or (AT4G36810.1.CDS) or (AT2G18620.1.CDS) or (AT1G78510.2.CDS) or (AT2G23800.1.CDS) or (AT3G32040.1.CDS) or (AT1G17050.1.CDS) or (AT3G29430.1.CDS) or (AT3G20160.1.CDS) or (AT1G78510.1.CDS) or (AT3G14550.1.CDS))
ATP_c0 + L-FUCOSE_c0 -> H_c0 + ADP_c0 + L-Fucose_1-phosphate_c0	(AT1G01220.1.CDS)
H2O_d0 + 2-Phosphoglycolate_d0 -> Orthophosphate_d0 + Glycolate_d0	((AT5G36700.3.CDS) or (AT5G36700.2.CDS) or (AT5G47760.1.CDS) or (AT5G36790.3.CDS) or (AT5G36790.1.CDS) or (AT5G36790.2.CDS) or (AT5G36700.1.CDS) or (AT5G36700.4.CDS))
H2O_n0 + 2-Phosphoglycolate_n0 -> Orthophosphate_n0 + Glycolate_n0	((AT5G36790.1.CDS) or (AT5G36790.2.CDS) or (AT5G36790.3.CDS))
Glutathione_c0 + Dinitrochlorobenzene_c0 -> H_c0 + Cl-_c0 + S-2_4-Dinitrophenylglutathione_c0	((AT1G78380.1.CDS) or (AT2G30860.1.CDS) or (AT4G02520.1.CDS) or (AT2G29420.1.CDS) or (AT1G17190.1.CDS) or (AT2G47730.1.CDS) or (AT2G29450.1.CDS) or (AT2G30860.2.CDS))
Glutathione_w0 + Dinitrochlorobenzene_w0 -> H_w0 + Cl-_w0 + S-2_4-Dinitrophenylglutathione_w0	(AT4G02520.1.CDS)
L-Homocysteine_c0 + 5-Methyltetrahydropteroyltri-L-glutamate_c0 -> L-Methionine_c0 + tetrahydropteroyl_tri-L-glutamate_c0	((AT5G17920.2.CDS) or (AT5G20980.1.CDS) or (AT5G20980.2.CDS) or (AT3G03780.3.CDS) or (AT3G03780.1.CDS) or (AT3G03780.2.CDS) or (AT5G17920.1.CDS))
Chorismate_d0 -> Isochorismate_d0	((AT1G74710.2.CDS) or (AT1G74710.1.CDS) or (AT1G18870.2.CDS) or (AT1G18870.1.CDS))
Mandelonitrile_c0 -> Aromatic_aldehyde_c0 + Hydrogen_cyanide_c0	((AT1G72970.2.CDS) or (AT1G72970.1.CDS) or (AT5G10300.1.CDS))
H2O_c0 + Geranyl_diphosphate_c0 -> cpd00012[c] + H_c0 + --alpha-Terpineol_c0	((AT3G25820.2.CDS) or (AT3G25820.1.CDS))
PLASTOQUINOL-1_c0 + 2 Oxidized-Plastocyanins_c0 -> 2 H_c0 + PLASTOQUINONE_c0 + 2 Plastocyanin-Reduced_c0	((AT4G03280.1.CDS) or (ATCG00540.1.CDS) or (AT1G30510.1.CDS) or (AT4G05390.2.CDS) or (AT1G20020.2.CDS) or (AT1G20020.1.CDS) or (ATCG00600.1.CDS) or (AT5G66190.2.CDS) or (AT4G03280.2.CDS) or (AT1G20020.3.CDS) or (ATCG00720.1.CDS) or (ATCG00730.1.CDS) or (AT1G30510.3.CDS) or (AT1G30510.2.CDS) or (AT5G66190.1.CDS) or (AT4G05390.1.CDS))
PLASTOQUINOL-1_d0 + 2 Oxidized-Plastocyanins_d0 -> 2 H_d0 + PLASTOQUINONE_d0 + 2 Plastocyanin-Reduced_d0	((AT4G03280.1.CDS) or (ATCG00540.1.CDS) or (AT1G30510.1.CDS) or (AT4G05390.2.CDS) or (AT1G20020.2.CDS) or (AT1G20020.1.CDS) or (ATCG00600.1.CDS) or (AT5G66190.2.CDS) or (AT4G03280.2.CDS) or (AT1G20020.3.CDS) or (ATCG00720.1.CDS) or (ATCG00730.1.CDS) or (AT1G30510.3.CDS) or (AT1G30510.2.CDS) or (AT5G66190.1.CDS) or (AT4G05390.1.CDS))
Oxygen_d0 + 2 PLASTOQUINOL-1_d0 -> 2 H2O_d0 + 2 PLASTOQUINONE_d0 + 4 hn_d0	((ATCG00570.1.CDS) or (AT1G06680.1.CDS) or (AT1G67740.1.CDS) or (AT3G21055.1.CDS) or (ATCG00560.1.CDS) or (AT5G23120.1.CDS) or (ATCG00710.1.CDS) or (AT4G28660.1.CDS) or (ATCG00580.1.CDS) or (AT1G51400.1.CDS) or (AT4G21280.1.CDS) or (AT5G66570.1.CDS) or (AT1G06680.2.CDS) or (ATCG00700.1.CDS) or (AT3G50820.1.CDS) or (AT2G30790.1.CDS) or (ATCG00020.1.CDS) or (AT4G28660.2.CDS) or (ATCG00220.1.CDS) or…
Aminoimidazole_ribotide_d0 + S-Adenosyl-L-methionine_d0 -> 2 H_d0 + Formate_d0 + L-Methionine_d0 + 4-Amino-2-methyl-5-phosphomethylpyrimidine_d0 + CO_d0 + 5-Deoxyadenosine_d0	((AT2G29630.2.CDS) or (AT2G29630.3.CDS) or (AT2G29630.1.CDS))
Pyruvate_c0 + L-Tryptophan_c0 -> L-Alanine_c0 + Indolepyruvate_c0	((AT1G23320.1.CDS) or (AT1G70560.1.CDS))
ATP_c0 + Glycine_c0 + Indole-3-acetate_c0 -> cpd00012[c] + 2 H_c0 + AMP_c0 + IAA-Gly_c0	((AT5G54510.1.CDS) or (AT1G59500.1.CDS) or (AT1G28130.2.CDS) or (AT4G27260.1.CDS) or (AT1G28130.1.CDS) or (AT2G23170.1.CDS) or (AT4G37390.1.CDS))
ATP_c0 + Indole-3-acetate_c0 + L-Isoleucine_c0 -> cpd00012[c] + 2 H_c0 + AMP_c0 + IAA-Ile_c0	((AT5G54510.1.CDS) or (AT4G27260.1.CDS) or (AT2G23170.1.CDS) or (AT4G37390.1.CDS))
ATP_c0 + L-Methionine_c0 + Indole-3-acetate_c0 -> cpd00012[c] + 2 H_c0 + AMP_c0 + IAA-Met_c0	((AT5G54510.1.CDS) or (AT1G59500.1.CDS) or (AT1G28130.2.CDS) or (AT4G27260.1.CDS) or (AT1G28130.1.CDS) or (AT2G23170.1.CDS) or (AT4G37390.1.CDS))
ATP_c0 + L-Tyrosine_c0 + Indole-3-acetate_c0 -> cpd00012[c] + 2 H_c0 + AMP_c0 + IAA-Tyr_c0	((AT5G54510.1.CDS) or (AT1G59500.1.CDS) or (AT1G28130.2.CDS) or (AT4G27260.1.CDS) or (AT1G28130.1.CDS) or (AT2G23170.1.CDS) or (AT4G37390.1.CDS))
ATP_c0 + L-Tryptophan_c0 + Indole-3-acetate_c0 -> cpd00012[c] + 2 H_c0 + AMP_c0 + IAA-Trp_c0	((AT5G54510.1.CDS) or (AT1G59500.1.CDS) or (AT1G28130.2.CDS) or (AT4G27260.1.CDS) or (AT1G28130.1.CDS) or (AT2G23170.1.CDS) or (AT4G37390.1.CDS))
ATP_c0 + --Jasmonic_acid_c0 + L-Isoleucine_c0 -> cpd00012[c] + 2 H_c0 + AMP_c0 + --Jasmonoyl-L-isoleucine_c0	((AT2G46370.4.CDS) or (AT2G46370.3.CDS) or (AT2G46370.2.CDS) or (AT2G46370.1.CDS))
H2O_c0 + Geranylgeranyl_diphosphate_c0 -> cpd00012[c] + H_c0 + E_E-geranyllinalool_c0	(AT1G61120.1.CDS)
2 NADPH_r0 + Oxygen_r0 + 9Z-Octadecenoic_acid_r0 -> H2O_r0 + 2 NADP_r0 + 18-Hydroxyoleate_r0	((AT2G45970.1.CDS) or (AT2G27690.1.CDS) or (AT4G00360.1.CDS) or (AT1G01600.1.CDS))
2 H_c0 + 2 Malonyl-CoA_c0 + Hexanoyl-CoA_c0 -> 2 CO2_c0 + 3 CoA_c0 + triketide_pyrone_c0	((AT1G02050.1.CDS) or (AT4G34850.1.CDS))
H2O_c0 + Methyl-Jasmonates_c0 -> H_c0 + Methanol_c0 + Jasmonic-Acids_c0	((AT2G23620.1.CDS) or (AT2G23610.1.CDS) or (AT3G50440.1.CDS) or (AT2G23600.1.CDS) or (AT4G37150.1.CDS) or (AT4G16690.1.CDS))
S-Adenosyl-L-methionine_c0 + Jasmonic-Acids_c0 -> S-Adenosyl-L-homocysteine_c0 + Methyl-Jasmonates_c0	(AT1G19640.1.CDS)
3-Phosphoadenylyl_sulfate_c0 + 22R_23R-28-homobrassinolide_c0 -> H_c0 + Adenosine_3_5-bisphosphate_c0 + 22R_23R-28-homobrassinolide-22-sulfate_c0	(AT2G14920.1.CDS)
3-Phosphoadenylyl_sulfate_c0 + 22R_23R-28-homocastasterone_c0 -> H_c0 + Adenosine_3_5-bisphosphate_c0 + 22R_23R-28-homocastasterone-22-O-sulfate_c0	(AT2G14920.1.CDS)
ATP_c0 + L-Glutamate_c0 + 4-Aminobenzoate_c0 -> cpd00012[c] + 2 H_c0 + AMP_c0 + 4-aminobenzoyl-glutamate_c0	(AT5G13320.1.CDS)
ATP_c0 + L-Glutamate_c0 + Vanillate_c0 -> cpd00012[c] + 2 H_c0 + AMP_c0 + N-4-hydroxy-3-methoxybenzoyl-L-glutamate_c0	(AT5G13320.1.CDS)
ATP_c0 + L-Glutamate_c0 + Benzoate_c0 -> cpd00012[c] + 2 H_c0 + AMP_c0 + BA-Glu_c0	(AT5G13320.1.CDS)
ATP_c0 + L-Glutamate_c0 + 4-Hydroxybenzoate_c0 -> cpd00012[c] + 2 H_c0 + AMP_c0 + 4HBA-Glu_c0	(AT5G13320.1.CDS)
Spermidine_c0 + 3 Caffeoyl-CoA_c0 -> 3 H_c0 + 3 CoA_c0 + N1_N5_N10-Tricaffeoyl_spermidine_c0	(AT2G19070.1.CDS)
Spermidine_c0 + 3 Feruloyl-CoA_c0 -> 3 H_c0 + 3 CoA_c0 + N1_N5_N10-Triferuloyl_spermidine_c0	(AT2G19070.1.CDS)
L-Glutamine_c0 + D-Ribose_5-phosphate_c0 + D-Glyceraldehyde_3-phosphate_c0 -> 3 H2O_c0 + Orthophosphate_c0 + H_c0 + L-Glutamate_c0 + Pyridoxal_phosphate_c0	((AT2G38230.1.CDS) or (AT5G01410.1.CDS) or (AT5G60540.1.CDS))
L-Glutamine_d0 + D-Ribose_5-phosphate_d0 + D-Glyceraldehyde_3-phosphate_d0 -> 3 H2O_d0 + Orthophosphate_d0 + H_d0 + L-Glutamate_d0 + Pyridoxal_phosphate_d0	(AT5G01410.1.CDS)
D-Ribose_5-phosphate_n0 + D-Glyceraldehyde_3-phosphate_n0 + L-Glutamine_n0 -> 3 H2O_n0 + Orthophosphate_n0 + H_n0 + L-Glutamate_n0 + Pyridoxal_phosphate_n0	((AT5G01410.1.CDS) or (AT5G60540.1.CDS))
D-Glyceraldehyde_3-phosphate_w0 + D-Ribose_5-phosphate_w0 + L-Glutamine_w0 -> 3 H2O_w0 + Orthophosphate_w0 + H_w0 + L-Glutamate_w0 + Pyridoxal_phosphate_w0	((AT5G01410.1.CDS) or (AT5G60540.1.CDS))
9_15_9-tricis-zeta-Carotene_d0 -> 9_9-dicis-zeta-Carotene_d0	((AT1G10830.2.CDS) or (AT1G10830.1.CDS))
S-Adenosyl-L-methionine_c0 + Gibberellin_A9_c0 -> S-Adenosyl-L-homocysteine_c0 + GA9_methyl_ester_c0	((AT4G26420.2.CDS) or (AT5G56300.1.CDS) or (AT4G26420.1.CDS))
S-Adenosyl-L-methionine_c0 + Gibberellin_A4_c0 -> S-Adenosyl-L-homocysteine_c0 + GA4_c0	((AT4G26420.2.CDS) or (AT5G56300.1.CDS) or (AT4G26420.1.CDS))
S-Adenosyl-L-methionine_c0 + Gibberellin_A20_c0 -> S-Adenosyl-L-homocysteine_c0 + GA20_methyl_ester_c0	((AT4G26420.2.CDS) or (AT4G26420.1.CDS))
S-Adenosyl-L-methionine_c0 + Gibberellin_A34_c0 -> S-Adenosyl-L-homocysteine_c0 + GA34_methyl_ester_c0	(AT5G56300.1.CDS)
NADP_c0 + 4-Methylthiobutanaldoxime_c0 -> H_c0 + NADPH_c0 + 4-methylthiobutanonitrile_oxide_c0	(AT4G13770.1.CDS)
NADP_r0 + 4-Methylthiobutanaldoxime_r0 -> H_r0 + NADPH_r0 + 4-methylthiobutanonitrile_oxide_r0	(AT4G13770.1.CDS)
NADP_c0 + 5-Methylthiopentanaldoxime_c0 -> H_c0 + NADPH_c0 + 5-methylthiopentanonitrile_oxide_c0	(AT4G13770.1.CDS)
NADP_r0 + 5-Methylthiopentanaldoxime_r0 -> H_r0 + NADPH_r0 + 5-methylthiopentanonitrile_oxide_r0	(AT4G13770.1.CDS)
NADP_c0 + 6-Methylthiohexanaldoxime_c0 -> H_c0 + NADPH_c0 + 6-methylthiohexanonitrile_oxide_c0	(AT4G13770.1.CDS)
NADP_r0 + 6-Methylthiohexanaldoxime_r0 -> H_r0 + NADPH_r0 + 6-methylthiohexanonitrile_oxide_r0	(AT4G13770.1.CDS)
NADP_c0 + 7-Methylthioheptanaldoxime_c0 -> H_c0 + NADPH_c0 + 7-methylthioheptanonitrile_oxide_c0	(AT4G13770.1.CDS)
NADP_r0 + 7-Methylthioheptanaldoxime_r0 -> H_r0 + NADPH_r0 + 7-methylthioheptanonitrile_oxide_r0	(AT4G13770.1.CDS)
NADP_c0 + 8-Methylthiooctanaldoxime_c0 -> H_c0 + NADPH_c0 + 8-methylthiooctanonitrile_oxide_c0	(AT4G13770.1.CDS)
NADP_r0 + 8-Methylthiooctanaldoxime_r0 -> H_r0 + NADPH_r0 + 8-methylthiooctanonitrile_oxide_r0	(AT4G13770.1.CDS)
NADP_c0 + 9-Methylthiononanaldoxime_c0 -> H_c0 + NADPH_c0 + 9-methylthiononanonitrile_oxide_c0	(AT4G13770.1.CDS)
NADP_r0 + 9-Methylthiononanaldoxime_r0 -> H_r0 + NADPH_r0 + 9-methylthiononanonitrile_oxide_r0	(AT4G13770.1.CDS)
H2O_c0 + S-Z-Phenylacetohydroximoyl-L-glutathione_c0 -> L-Glutamate_c0 + N-S-Z-phenylacetohydroximoyl-L-cysteinylglycine_c0	(AT4G30530.1.CDS)
H2O_c0 + indole-3-acetohydroximoyl-glutathione_c0 -> L-Glutamate_c0 + indole-3-acetohydroximoyl-cysteinylglycine_c0	(AT4G30530.1.CDS)
H2O_c0 + 4-methylthiobutylhydroximoyl-glutathione_c0 -> L-Glutamate_c0 + 4-methylthiobutylhydroximoyl-cysteinylglycine_c0	(AT4G30530.1.CDS)
H2O_c0 + 5-methylthiopentylhydroximoyl-glutathione_c0 -> L-Glutamate_c0 + 5-methylthiopentylhydroximoyl-cysteinylglycine_c0	(AT4G30530.1.CDS)
H2O_c0 + 6-methylthiohexylhydroximoyl-glutathione_c0 -> L-Glutamate_c0 + 6-methylthiohexylhydroximoyl-cysteinylglycine_c0	(AT4G30530.1.CDS)
H2O_c0 + 7-methylthioheptylhydroximoyl-glutathione_c0 -> L-Glutamate_c0 + 7-methylthioheptylhydroximoyl-cysteinylglycine_c0	(AT4G30530.1.CDS)
H2O_c0 + 8-methylthiooctylhydroximoyl-glutathione_c0 -> L-Glutamate_c0 + 8-methylthiooctylhydroximoyl-cysteinylglycine_c0	(AT4G30530.1.CDS)
H2O_c0 + 9-methylthiononylhydroximoyl-glutathione_c0 -> L-Glutamate_c0 + 9-methylthiononylhydroximoyl-cysteinylglycine_c0	(AT4G30530.1.CDS)
H2O_r0 + Abscisic_acid_glucose_ester_r0 -> H_r0 + Abscisate_r0 + beta-D-Glucose_r0	((AT1G52400.2.CDS) or (AT1G52400.3.CDS) or (AT1G52400.1.CDS))
UDP-L-arabinose_g0 -> UDP-L-arabinofuranose_g0	((AT5G15650.1.CDS) or (AT3G08900.1.CDS) or (AT3G02230.1.CDS))
S-Adenosyl-L-methionine_c0 + Farnesoic_acid_c0 -> S-Adenosyl-L-homocysteine_c0 + Methyl_farnesoate_c0	(AT3G44860.1.CDS)
31-norcycloartenol_c0 -> 29-norlanosterol_c0	((AT5G50375.1.CDS) or (AT5G50375.2.CDS))
H_c0 + Oxygen_c0 + NADPH_c0 + Nerolidol_c0 -> 2 H2O_c0 + NADP_c0 + 1-buten-3-one_c0 + 3E-4_8-dimethyl-1_3_7-nonatriene_c0	((AT3G25180.2.CDS) or (AT3G25180.1.CDS))
H_c0 + N_N-Dihydroxy-L-phenylalanine_c0 -> H2O_c0 + CO2_c0 + N-Benzylformamide_c0	(AT5G05260.1.CDS)
H_c0 + NADPH_c0 + Androstenedione_c0 -> NADP_c0 + 5alpha-Androstane-3_17-dione_c0	((AT4G24220.2.CDS) or (AT4G24220.1.CDS))
H_c0 + NADPH_c0 + Acrolein_c0 -> NADP_c0 + Propanal_c0	(AT1G23740.1.CDS)
H_d0 + NADPH_d0 + Acrolein_d0 -> NADP_d0 + Propanal_d0	(AT1G23740.1.CDS)
H_c0 + NADPH_c0 + Z-but-2-enal_c0 -> NADP_c0 + Butanal_c0	(AT1G23740.1.CDS)
H_d0 + NADPH_d0 + Z-but-2-enal_d0 -> NADP_d0 + Butanal_d0	(AT1G23740.1.CDS)
H_c0 + NADPH_c0 + 1-buten-3-one_c0 -> NADP_c0 + Methyl_ethyl_ketone_c0	(AT1G23740.1.CDS)
H_d0 + NADPH_d0 + 1-buten-3-one_d0 -> NADP_d0 + Methyl_ethyl_ketone_d0	(AT1G23740.1.CDS)
H_c0 + NADPH_c0 + 1-penten-3-one_c0 -> NADP_c0 + 1-pentan-3-one_c0	(AT1G23740.1.CDS)
H_d0 + NADPH_d0 + 1-penten-3-one_d0 -> NADP_d0 + 1-pentan-3-one_d0	(AT1G23740.1.CDS)
H_c0 + NADPH_c0 + E-2-hexen-4-one_c0 -> NADP_c0 + 3-hexanone_c0	(AT1G23740.1.CDS)
H_d0 + NADPH_d0 + E-2-hexen-4-one_d0 -> NADP_d0 + 3-hexanone_d0	(AT1G23740.1.CDS)
ATP_c0 + 2-trans_6-trans-Farnesol_c0 -> H_c0 + ADP_c0 + trans_trans-Farnesyl_phosphate_c0	(AT5G58560.1.CDS)
ATP_c0 + Geraniol_c0 -> H_c0 + ADP_c0 + E-geranyl_phosphate_c0	(AT5G58560.1.CDS)
ATP_c0 + Geranylgeraniol_c0 -> H_c0 + ADP_c0 + 2E_6E_10E-geranylgeranyl_monophosphate_c0	(AT5G58560.1.CDS)
Oxygen_c0 + beta-apo-10-carotenal_c0 -> 2E_4E_6E-4-methylocta-2_4_6-trienedial_c0 + 13-apo-beta-carotenone_c0	(AT4G32810.1.CDS)
Oxygen_d0 + beta-apo-10-carotenal_d0 -> 2E_4E_6E-4-methylocta-2_4_6-trienedial_d0 + 13-apo-beta-carotenone_d0	(AT4G32810.1.CDS)
H_c0 + Oxygen_c0 + NADPH_c0 + -7-iso-JA-L-Ile_c0 -> H2O_c0 + NADP_c0 + 3R__7S-12-OH-JA-Ile_c0	(AT3G48520.1.CDS)
Malonyl-CoA_c0 + 2-naphthol_glucoside_c0 -> CoA_c0 + 2-naphthol_6-O-malonylglucoside_c0	((AT5G39050.1.CDS) or (AT3G29670.1.CDS))
Malonyl-CoA_c0 + 1-naphthol_glucoside_c0 -> CoA_c0 + 1-naphthol_6-O-malonylglucoside_c0	((AT5G39050.1.CDS) or (AT3G29670.1.CDS))
Malonyl-CoA_c0 + 4-methylumbelliferyl_glucoside_c0 -> CoA_c0 + 4-methylumbelliferone_6-O-malonylglucoside_c0	((AT5G39050.1.CDS) or (AT3G29670.1.CDS))
NADP_c0 + 3R-3-hydroxy-behenoyl-CoA_c0 -> H_c0 + NADPH_c0 + 3-oxo-behenoyl-CoA_c0	(AT1G67730.1.CDS)
NADP_r0 + 3R-3-hydroxy-behenoyl-CoA_r0 -> H_r0 + NADPH_r0 + 3-oxo-behenoyl-CoA_r0	(AT1G67730.1.CDS)
NADP_c0 + 3R-3-hydroxy-arachidoyl-CoA_c0 -> H_c0 + NADPH_c0 + 3-oxo-arachidoyl-CoA_c0	(AT1G67730.1.CDS)
NADP_r0 + 3R-3-hydroxy-arachidoyl-CoA_r0 -> H_r0 + NADPH_r0 + 3-oxo-arachidoyl-CoA_r0	(AT1G67730.1.CDS)
NADP_c0 + 3R-3-hydroxy-lignoceroyl-CoA_c0 -> H_c0 + NADPH_c0 + 3-oxo-lignoceroyl-CoA_c0	(AT1G67730.1.CDS)
NADP_r0 + 3R-3-hydroxy-lignoceroyl-CoA_r0 -> H_r0 + NADPH_r0 + 3-oxo-lignoceroyl-CoA_r0	(AT1G67730.1.CDS)
NADP_c0 + 3R-3-hydroxy-cerotoyl-CoA_c0 -> H_c0 + NADPH_c0 + 3-oxo-cerotoyl-CoA_c0	(AT1G67730.1.CDS)
NADP_r0 + 3R-3-hydroxy-cerotoyl-CoA_r0 -> H_r0 + NADPH_r0 + 3-oxo-cerotoyl-CoA_r0	(AT1G67730.1.CDS)
Oxygen_c0 + 2-Oxoglutarate_c0 + Gibberellin_A51_c0 -> H2O_c0 + H_c0 + CO2_c0 + Succinate_c0 + Gibberellin_A51-catabolite_c0	((AT1G30040.2.CDS) or (AT1G30040.1.CDS))
1-18_1-2-16_0-phosphatidylglycerol_d0 -> 2 H_d0 + 1-9Z-octadecenoyl-2-3E-hexadecenoyl-sn-glycero-3-phospho-1-sn-glycerol_d0	((AT1G62190.1.CDS) or (AT2G22890.1.CDS) or (AT4G27030.1.CDS))
1-9Z-octadecenoyl-2-3E-hexadecenoyl-sn-glycero-3-phospho-1-sn-glycerol_d0 -> 2 H_d0 + 1-9Z_12Z-octadecadienoyl-2-3E-hexadecenoyl-sn-glycero-3-phospho-1-sn-glycerol_d0	((AT4G30950.1.CDS) or (AT3G12120.2.CDS) or (AT3G12120.1.CDS))
1-9Z-octadecenoyl-2-3E-hexadecenoyl-sn-glycero-3-phospho-1-sn-glycerol_r0 -> 2 H_r0 + 1-9Z_12Z-octadecadienoyl-2-3E-hexadecenoyl-sn-glycero-3-phospho-1-sn-glycerol_r0	((AT3G12120.2.CDS) or (AT3G12120.1.CDS))
1-9Z_12Z-octadecadienoyl-2-3E-hexadecenoyl-sn-glycero-3-phospho-1-sn-glycerol_d0 -> 2 H_d0 + 1-9Z_12Z_15Z-octadecatrienoyl-2-3E-hexadecenoyl-sn-glycero-3-phospho-1-sn-glycerol_d0	((AT5G05580.1.CDS) or (AT5G05580.2.CDS) or (AT3G11170.1.CDS) or (AT2G29980.1.CDS) or (AT2G29980.2.CDS))
1-9Z_12Z-octadecadienoyl-2-3E-hexadecenoyl-sn-glycero-3-phospho-1-sn-glycerol_r0 -> 2 H_r0 + 1-9Z_12Z_15Z-octadecatrienoyl-2-3E-hexadecenoyl-sn-glycero-3-phospho-1-sn-glycerol_r0	((AT2G29980.1.CDS) or (AT2G29980.2.CDS))
1-9Z-octadecenoyl-2-hexadecanoyl-3-O-beta-D-galactosyl-sn-glycerol_d0 -> 2 H_d0 + 1-9Z-octadecenoyl-2-7Z-hexadecenoyl-3-O-beta-D-galactosyl-sn-glycerol__d0	(AT3G15850.1.CDS)
H2O_x0 + S-Benzoate_coenzyme_A_x0 -> H_x0 + CoA_x0 + Benzoate_x0	((AT5G48950.2.CDS) or (AT5G48950.1.CDS))
NADP_c0 + 18-Hydroxyoleate_c0 -> H_c0 + NADPH_c0 + 18-Oxooleate_c0	((AT1G72970.2.CDS) or (AT1G72970.1.CDS))
2 H_r0 + 2 NADPH_r0 + 2 Oxygen_r0 + Homomethionine_r0 -> 3 H2O_r0 + 2 NADP_r0 + CO2_r0 + 4-Methylthiobutanaldoxime_r0	((AT1G16410.1.CDS) or (AT1G16410.2.CDS) or (AT1G16400.1.CDS))
Oxygen_c0 + Glucoiberin_c0 -> H_c0 + Methanesulfonic_acid_c0 + Sinigrin_c0	(AT4G03070.1.CDS)
all-trans-Nonaprenyl_diphosphate_d0 + Homogentisate_d0 -> Diphosphate_d0 + CO2_d0 + 2-Methyl-6-solanyl-1_4-benzoquinol_d0	((AT3G11945.2.CDS) or (AT3G11945.1.CDS))
Oxygen_c0 + 2-Oxoglutarate_c0 + Gibberellin_A34_c0 -> H2O_c0 + H_c0 + CO2_c0 + Succinate_c0 + Gibberellin_A34-catabolite_c0	((AT2G34555.1.CDS) or (AT1G30040.2.CDS) or (AT1G30040.1.CDS))
ATP_c0 + L-Aspartate_c0 + Indole-3-acetate_c0 -> cpd00012[c] + 2 H_c0 + AMP_c0 + IAA-Asp_c0	((AT5G54510.1.CDS) or (AT1G59500.1.CDS) or (AT1G28130.2.CDS) or (AT4G27260.1.CDS) or (AT1G28130.1.CDS) or (AT2G23170.1.CDS) or (AT4G37390.1.CDS))
ATP_c0 + L-Glutamate_c0 + Indole-3-acetate_c0 -> cpd00012[c] + 2 H_c0 + AMP_c0 + IAA-Glu_c0	((AT5G54510.1.CDS) or (AT1G59500.1.CDS) or (AT1G28130.2.CDS) or (AT4G27260.1.CDS) or (AT1G28130.1.CDS) or (AT2G23170.1.CDS) or (AT4G37390.1.CDS))
ATP_c0 + L-Glutamine_c0 + Indole-3-acetate_c0 -> cpd00012[c] + 2 H_c0 + AMP_c0 + IAA-Gln_c0	((AT5G54510.1.CDS) or (AT1G59500.1.CDS) or (AT1G28130.2.CDS) or (AT4G27260.1.CDS) or (AT1G28130.1.CDS) or (AT4G37390.1.CDS))
S-Adenosyl-L-methionine_r0 + Cycloartenol_r0 -> H_r0 + S-Adenosyl-L-homocysteine_r0 + 24-Methylenecycloartanol_r0	((AT1G20330.1.CDS) or (AT5G13710.2.CDS) or (AT5G13710.1.CDS))
2 H_c0 + 2 Oxygen_c0 + 2 NADPH_c0 + L-Phenylalanine_c0 -> 3 H2O_c0 + CO2_c0 + 2 NADP_c0 + N-Benzylformamide_c0	((AT5G35917.1.CDS) or (AT5G05260.1.CDS))
Geranyl_diphosphate_c0 -> cpd00012[c] + H_c0 + CPD-4893_c0	((AT3G25820.2.CDS) or (AT3G25810.1.CDS) or (AT3G25820.1.CDS))
H_c0 + UDP-glucose_c0 + 4-Aminobenzoate_c0 -> UDP_c0 + p-PAPA-Glc_c0	((AT2G43840.2.CDS) or (AT1G05560.1.CDS) or (AT2G43820.1.CDS) or (AT2G43840.1.CDS))
S-Adenosyl-L-methionine_c0 + 9Z-Octadecenoic_acid_c0 -> H_c0 + S-Adenosyl-L-homocysteine_c0 + dihydrosterculate_c0	((AT3G23460.1.CDS) or (AT3G23480.2.CDS) or (AT3G23510.1.CDS) or (AT3G23470.1.CDS) or (AT3G23530.1.CDS) or (AT3G23480.1.CDS))
2 H_c0 + 2 Malonyl-CoA_c0 + p-Coumaroyl-CoA_c0 -> 2 CO2_c0 + 3 CoA_c0 + Bis-noryangonin_c0	((AT1G02050.1.CDS) or (AT4G34850.1.CDS))
H_c0 + Oxygen_c0 + NADPH_c0 + Naringenin_c0 -> H2O_c0 + NADP_c0 + Eriodictyol_c0	((AT3G25180.2.CDS) or (AT5G07990.1.CDS) or (AT3G25180.1.CDS))
3 H_d0 + 71-Hydroxychlorophyll_a_d0 + 2 Reduced-ferredoxins_d0 -> H2O_d0 + Chlorophyll_a_d0 + 2 Oxidized-ferredoxins_d0	(AT1G04620.1.CDS)
CTP_c0 + Phytol_c0 -> H_c0 + CDP_c0 + phytolmonophosphate_c0	(AT5G04490.1.CDS)
CTP_d0 + Phytol_d0 -> H_d0 + CDP_d0 + phytolmonophosphate_d0	(AT5G04490.1.CDS)
2 H_d0 + NADPH_d0 + Oxygen_d0 + Pheophorbide_a_d0 -> NADP_d0 + Red_chlorophyll_catabolite_d0	(AT3G44880.1.CDS)
H_d0 + NADPH_d0 + Red_chlorophyll_catabolite_d0 -> NADP_d0 + Primary_fluorescent_chlorophyll_catabolite_d0	(AT4G37000.1.CDS)
2 Oxygen_c0 + beta-Carotene_c0 -> 2 beta-Ionone_c0 + 4_9-dimethyldodeca-2_4_6_8_10-pentaene-1_12-dial_c0	((AT3G63520.1.CDS) or (AT4G19170.1.CDS))
2 Oxygen_d0 + beta-Carotene_d0 -> 2 beta-Ionone_d0 + 4_9-dimethyldodeca-2_4_6_8_10-pentaene-1_12-dial_d0	(AT4G19170.1.CDS)
2 Oxygen_c0 + Lutein_c0 -> 4_9-dimethyldodeca-2_4_6_8_10-pentaene-1_12-dial_c0 + 3-hydroxy-9-apo-delta-caroten-9-one_c0 + 3-hydroxy-9-apo-beta-caroten-9-one_c0	((AT3G63520.1.CDS) or (AT4G19170.1.CDS))
2 Oxygen_d0 + Lutein_d0 -> 4_9-dimethyldodeca-2_4_6_8_10-pentaene-1_12-dial_d0 + 3-hydroxy-9-apo-delta-caroten-9-one_d0 + 3-hydroxy-9-apo-beta-caroten-9-one_d0	(AT4G19170.1.CDS)
2 Oxygen_c0 + Zeaxanthin_c0 -> 4_9-dimethyldodeca-2_4_6_8_10-pentaene-1_12-dial_c0 + 2 3-hydroxy-9-apo-beta-caroten-9-one_c0	((AT3G63520.1.CDS) or (AT4G19170.1.CDS))
2 Oxygen_d0 + Zeaxanthin_d0 -> 4_9-dimethyldodeca-2_4_6_8_10-pentaene-1_12-dial_d0 + 2 3-hydroxy-9-apo-beta-caroten-9-one_d0	(AT4G19170.1.CDS)
2 Oxygen_c0 + Violaxanthin_c0 -> 4_9-dimethyldodeca-2_4_6_8_10-pentaene-1_12-dial_c0 + 2 5_6-epoxy-3-hydroxy-9-apo-beta-caroten-9-one_c0	((AT3G63520.1.CDS) or (AT4G19170.1.CDS))
2 Oxygen_d0 + Violaxanthin_d0 -> 4_9-dimethyldodeca-2_4_6_8_10-pentaene-1_12-dial_d0 + 2 5_6-epoxy-3-hydroxy-9-apo-beta-caroten-9-one_d0	(AT4G19170.1.CDS)
Oxygen_c0 + 9-cis-Violaxanthin_c0 -> 5_6-epoxy-3-hydroxy-9-apo-beta-caroten-9-one_c0 + 5_6-epoxy-3-hydroxy-12-apo-beta-caroten-12-al_c0	((AT3G63520.1.CDS) or (AT4G19170.1.CDS))
Oxygen_d0 + 9-cis-Violaxanthin_d0 -> 5_6-epoxy-3-hydroxy-9-apo-beta-caroten-9-one_d0 + 5_6-epoxy-3-hydroxy-12-apo-beta-caroten-12-al_d0	(AT4G19170.1.CDS)
Oxygen_c0 + 5_6-epoxy-3-hydroxy-12-apo-beta-caroten-12-al_c0 -> 4_9-dimethyldodeca-2_4_6_8_10-pentaene-1_12-dial_c0 + 5_6-epoxy-3-hydroxy-9-apo-beta-caroten-9-one_c0	((AT3G63520.1.CDS) or (AT4G19170.1.CDS))
Oxygen_d0 + 5_6-epoxy-3-hydroxy-12-apo-beta-caroten-12-al_d0 -> 4_9-dimethyldodeca-2_4_6_8_10-pentaene-1_12-dial_d0 + 5_6-epoxy-3-hydroxy-9-apo-beta-caroten-9-one_d0	(AT4G19170.1.CDS)
Oxygen_c0 + 9-cis-Neoxanthin_c0 -> 5_6-epoxy-3-hydroxy-12-apo-beta-caroten-12-al_c0 + 3S_5R_6R-3_5-dihydroxy-6_7-didehydro-5_6-dihydro-9-apo-beta-caroten-9-one_c0	((AT3G63520.1.CDS) or (AT4G19170.1.CDS))
Oxygen_d0 + 9-cis-Neoxanthin_d0 -> 5_6-epoxy-3-hydroxy-12-apo-beta-caroten-12-al_d0 + 3S_5R_6R-3_5-dihydroxy-6_7-didehydro-5_6-dihydro-9-apo-beta-caroten-9-one_d0	(AT4G19170.1.CDS)
Oxygen_c0 + 9-cis-Neoxanthin_c0 -> 5_6-epoxy-3-hydroxy-9-apo-beta-caroten-9-one_c0 + 3_5-dihydroxy-6_7-didehydro-12-apo-beta-caroten-12-al_c0	((AT3G63520.1.CDS) or (AT4G19170.1.CDS))
Oxygen_d0 + 9-cis-Neoxanthin_d0 -> 5_6-epoxy-3-hydroxy-9-apo-beta-caroten-9-one_d0 + 3_5-dihydroxy-6_7-didehydro-12-apo-beta-caroten-12-al_d0	(AT4G19170.1.CDS)
Oxygen_c0 + 3_5-dihydroxy-6_7-didehydro-12-apo-beta-caroten-12-al_c0 -> 4_9-dimethyldodeca-2_4_6_8_10-pentaene-1_12-dial_c0 + 3S_5R_6R-3_5-dihydroxy-6_7-didehydro-5_6-dihydro-9-apo-beta-caroten-9-one_c0	((AT3G63520.1.CDS) or (AT4G19170.1.CDS))
Oxygen_d0 + 3_5-dihydroxy-6_7-didehydro-12-apo-beta-caroten-12-al_d0 -> 4_9-dimethyldodeca-2_4_6_8_10-pentaene-1_12-dial_d0 + 3S_5R_6R-3_5-dihydroxy-6_7-didehydro-5_6-dihydro-9-apo-beta-caroten-9-one_d0	(AT4G19170.1.CDS)
Oxygen_c0 + all-trans-8-Apo-beta-carotenal_c0 -> beta-Ionone_c0 + 2E_4E_6E_8E_10E_12E-2_6_11-trimethyltetradeca-2_4_6_8_10_12-hexaenedial_c0	((AT3G63520.1.CDS) or (AT4G19170.1.CDS))
Oxygen_d0 + all-trans-8-Apo-beta-carotenal_d0 -> beta-Ionone_d0 + 2E_4E_6E_8E_10E_12E-2_6_11-trimethyltetradeca-2_4_6_8_10_12-hexaenedial_d0	(AT4G19170.1.CDS)
Ascorbate_d0 + Violaxanthin_d0 -> H2O_d0 + Dehydroascorbate_d0 + Antheraxanthin_d0	((AT1G08550.1.CDS) or (AT1G08550.2.CDS))
Ascorbate_d0 + Antheraxanthin_d0 -> H2O_d0 + Dehydroascorbate_d0 + Zeaxanthin_d0	((AT1G08550.1.CDS) or (AT1G08550.2.CDS))
1-9Z-octadecenoyl-2-hexadecanoyl-3-O-beta-D-galactosyl-sn-glycerol_d0 -> 2 H_d0 + 1-9Z_12Z-octadecadienoyl-2-hexadecanoyl-3-O-beta-D-galactosyl-sn-glycerol_d0	((AT4G30950.1.CDS) or (AT3G12120.2.CDS) or (AT3G12120.1.CDS))
1-9Z-octadecenoyl-2-hexadecanoyl-3-O-beta-D-galactosyl-sn-glycerol_r0 -> 2 H_r0 + 1-9Z_12Z-octadecadienoyl-2-hexadecanoyl-3-O-beta-D-galactosyl-sn-glycerol_r0	((AT3G12120.2.CDS) or (AT3G12120.1.CDS))
1-9Z_12Z-octadecadienoyl-2-hexadecanoyl-3-O-beta-D-galactosyl-sn-glycerol_d0 -> 2 H_d0 + 1-9Z_12Z_15Z-octadecatrienoyl-2-hexadecanoyl-3-O-beta-D-galactosyl-sn-glycerol_d0	((AT5G05580.1.CDS) or (AT5G05580.2.CDS) or (AT3G11170.1.CDS) or (AT2G29980.1.CDS) or (AT2G29980.2.CDS))
1-9Z-octadecenoyl-2-7Z-hexadecenoyl-3-O-beta-D-galactosyl-sn-glycerol__d0 -> 2 H_d0 + 1-9Z_12Z-octadecadienoyl-2-7Z-hexadecenoyl-3-O-beta-D-galactosyl-sn-glycerol_d0	((AT4G30950.1.CDS) or (AT3G12120.2.CDS) or (AT3G12120.1.CDS))
1-9Z-octadecenoyl-2-7Z-hexadecenoyl-3-O-beta-D-galactosyl-sn-glycerol__r0 -> 2 H_r0 + 1-9Z_12Z-octadecadienoyl-2-7Z-hexadecenoyl-3-O-beta-D-galactosyl-sn-glycerol_r0	((AT3G12120.2.CDS) or (AT3G12120.1.CDS))
1-9Z_12Z-octadecadienoyl-2-7Z-hexadecenoyl-3-O-beta-D-galactosyl-sn-glycerol_d0 -> 2 H_d0 + 1-9Z_12Z_15Z-octadecatrienoyl-2-7Z-hexadecenoyl-3-O-beta-D-galactosyl-sn-glycerol_d0	((AT5G05580.1.CDS) or (AT5G05580.2.CDS) or (AT3G11170.1.CDS) or (AT2G29980.1.CDS) or (AT2G29980.2.CDS))
1-9Z-octadecenoyl-2-7Z_10Z-hexadecadienoyl-3-O-beta-D-galactosyl-sn-glycerol_d0 -> 2 H_d0 + 1-9Z_12Z-octadecadienoyl-2-7Z_10Z-hexadecadienoyl-3-O-beta-D-galactosyl-sn-glycerol_d0	((AT4G30950.1.CDS) or (AT3G12120.2.CDS) or (AT3G12120.1.CDS))
1-9Z-octadecenoyl-2-7Z_10Z-hexadecadienoyl-3-O-beta-D-galactosyl-sn-glycerol_r0 -> 2 H_r0 + 1-9Z_12Z-octadecadienoyl-2-7Z_10Z-hexadecadienoyl-3-O-beta-D-galactosyl-sn-glycerol_r0	((AT3G12120.2.CDS) or (AT3G12120.1.CDS))
1-9Z_12Z-octadecadienoyl-2-7Z_10Z-hexadecadienoyl-3-O-beta-D-galactosyl-sn-glycerol_d0 -> 2 H_d0 + 1-9Z_12Z_15Z-octadecatrienoyl-2-7Z_10Z-hexadecadienoyl-3-O-beta-D-galactosyl-sn-glycerol_d0	((AT5G05580.1.CDS) or (AT5G05580.2.CDS) or (AT3G11170.1.CDS) or (AT2G29980.1.CDS) or (AT2G29980.2.CDS))
1-9Z-octadecenoyl-2-7Z_10Z_13Z-hexadecatrienoyl-3-O-beta-D-galactosyl-sn-glycerol_d0 -> 2 H_d0 + 1-9Z_12Z-octadecadienoyl-2-7Z_10Z_13Z-hexadecatrienoyl-3-O-beta-D-galactosyl-sn-glycerol_d0	((AT4G30950.1.CDS) or (AT3G12120.2.CDS) or (AT3G12120.1.CDS))
1-9Z-octadecenoyl-2-7Z_10Z_13Z-hexadecatrienoyl-3-O-beta-D-galactosyl-sn-glycerol_r0 -> 2 H_r0 + 1-9Z_12Z-octadecadienoyl-2-7Z_10Z_13Z-hexadecatrienoyl-3-O-beta-D-galactosyl-sn-glycerol_r0	((AT3G12120.2.CDS) or (AT3G12120.1.CDS))
1-9Z_12Z-octadecadienoyl-2-7Z_10Z_13Z-hexadecatrienoyl-3-O-beta-D-galactosyl-sn-glycerol_d0 -> 2 H_d0 + 1-9Z_12Z_15Z-octadecatrienoyl-2-7Z_10Z_13Z-hexadecatrienoyl-3-O-beta-D-galactosyl-sn-glycerol_d0	((AT5G05580.1.CDS) or (AT5G05580.2.CDS) or (AT3G11170.1.CDS) or (AT2G29980.1.CDS) or (AT2G29980.2.CDS))
1-9Z-octadecenoyl-2-7Z-hexadecenoyl-3-O-beta-D-galactosyl-sn-glycerol__d0 -> 2 H_d0 + 1-9Z-octadecenoyl-2-7Z_10Z-hexadecadienoyl-3-O-beta-D-galactosyl-sn-glycerol_d0	((AT4G30950.1.CDS) or (AT3G12120.2.CDS) or (AT3G12120.1.CDS))
1-9Z-octadecenoyl-2-7Z-hexadecenoyl-3-O-beta-D-galactosyl-sn-glycerol__r0 -> 2 H_r0 + 1-9Z-octadecenoyl-2-7Z_10Z-hexadecadienoyl-3-O-beta-D-galactosyl-sn-glycerol_r0	((AT3G12120.2.CDS) or (AT3G12120.1.CDS))
1-9Z-octadecenoyl-2-7Z_10Z-hexadecadienoyl-3-O-beta-D-galactosyl-sn-glycerol_d0 -> 2 H_d0 + 1-9Z-octadecenoyl-2-7Z_10Z_13Z-hexadecatrienoyl-3-O-beta-D-galactosyl-sn-glycerol_d0	((AT5G05580.1.CDS) or (AT5G05580.2.CDS) or (AT3G11170.1.CDS) or (AT2G29980.1.CDS) or (AT2G29980.2.CDS))
1-9Z_12Z-octadecadienoyl-2-hexadecanoyl-3-O-beta-D-galactosyl-sn-glycerol_d0 -> 2 H_d0 + 1-9Z_12Z-octadecadienoyl-2-7Z-hexadecenoyl-3-O-beta-D-galactosyl-sn-glycerol_d0	(AT3G15850.1.CDS)
1-9Z_12Z-octadecadienoyl-2-7Z-hexadecenoyl-3-O-beta-D-galactosyl-sn-glycerol_d0 -> 2 H_d0 + 1-9Z_12Z-octadecadienoyl-2-7Z_10Z-hexadecadienoyl-3-O-beta-D-galactosyl-sn-glycerol_d0	((AT4G30950.1.CDS) or (AT3G12120.2.CDS) or (AT3G12120.1.CDS))
1-9Z_12Z-octadecadienoyl-2-7Z-hexadecenoyl-3-O-beta-D-galactosyl-sn-glycerol_r0 -> 2 H_r0 + 1-9Z_12Z-octadecadienoyl-2-7Z_10Z-hexadecadienoyl-3-O-beta-D-galactosyl-sn-glycerol_r0	((AT3G12120.2.CDS) or (AT3G12120.1.CDS))
1-9Z_12Z-octadecadienoyl-2-7Z_10Z-hexadecadienoyl-3-O-beta-D-galactosyl-sn-glycerol_d0 -> 2 H_d0 + 1-9Z_12Z-octadecadienoyl-2-7Z_10Z_13Z-hexadecatrienoyl-3-O-beta-D-galactosyl-sn-glycerol_d0	((AT5G05580.1.CDS) or (AT5G05580.2.CDS) or (AT3G11170.1.CDS) or (AT2G29980.1.CDS) or (AT2G29980.2.CDS))
1-9Z_12Z_15Z-octadecatrienoyl-2-hexadecanoyl-3-O-beta-D-galactosyl-sn-glycerol_d0 -> 2 H_d0 + 1-9Z_12Z_15Z-octadecatrienoyl-2-7Z-hexadecenoyl-3-O-beta-D-galactosyl-sn-glycerol_d0	(AT3G15850.1.CDS)
1-9Z_12Z_15Z-octadecatrienoyl-2-7Z-hexadecenoyl-3-O-beta-D-galactosyl-sn-glycerol_d0 -> 2 H_d0 + 1-9Z_12Z_15Z-octadecatrienoyl-2-7Z_10Z-hexadecadienoyl-3-O-beta-D-galactosyl-sn-glycerol_d0	((AT4G30950.1.CDS) or (AT3G12120.2.CDS) or (AT3G12120.1.CDS))
1-9Z_12Z_15Z-octadecatrienoyl-2-7Z-hexadecenoyl-3-O-beta-D-galactosyl-sn-glycerol_r0 -> 2 H_r0 + 1-9Z_12Z_15Z-octadecatrienoyl-2-7Z_10Z-hexadecadienoyl-3-O-beta-D-galactosyl-sn-glycerol_r0	((AT3G12120.2.CDS) or (AT3G12120.1.CDS))
1-9Z_12Z_15Z-octadecatrienoyl-2-7Z_10Z-hexadecadienoyl-3-O-beta-D-galactosyl-sn-glycerol_d0 -> 2 H_d0 + 1-9Z_12Z_15Z-octadecatrienoyl-2-7Z_10Z_13Z-hexadecatrienoyl-3-O-beta-D-galactosyl-sn-glycerol_d0	((AT5G05580.1.CDS) or (AT5G05580.2.CDS) or (AT3G11170.1.CDS) or (AT2G29980.1.CDS) or (AT2G29980.2.CDS))
1_2-9Z_12Z-octadecadienoyl-3-O-alpha-D-galactosyl-1->6-O-beta-D-galactosyl-sn-glycerol_d0 -> 2 H_d0 + 1-18_3-2-18_2-digalactosyldiacylglycerol_d0	((AT5G05580.1.CDS) or (AT5G05580.2.CDS) or (AT3G11170.1.CDS) or (AT2G29980.1.CDS) or (AT2G29980.2.CDS))
1_2-9Z_12Z-octadecadienoyl-3-O-alpha-D-galactosyl-1->6-O-beta-D-galactosyl-sn-glycerol_r0 -> 2 H_r0 + 1-18_3-2-18_2-digalactosyldiacylglycerol_r0	((AT2G29980.1.CDS) or (AT2G29980.2.CDS))
1-18_3-2-18_2-digalactosyldiacylglycerol_d0 -> 2 H_d0 + 1_2-9Z_12Z_15Z-octadecatrienoyl-3-O-alpha-D-galactosyl-1->6-O-beta-D-galactosyl-sn-glycerol_d0	((AT5G05580.1.CDS) or (AT5G05580.2.CDS) or (AT3G11170.1.CDS) or (AT2G29980.1.CDS) or (AT2G29980.2.CDS))
1-18_3-2-18_2-digalactosyldiacylglycerol_r0 -> 2 H_r0 + 1_2-9Z_12Z_15Z-octadecatrienoyl-3-O-alpha-D-galactosyl-1->6-O-beta-D-galactosyl-sn-glycerol_r0	((AT2G29980.1.CDS) or (AT2G29980.2.CDS))
1_2-9Z_12Z-octadecadienoyl-3-O-alpha-D-galactosyl-1->6-O-beta-D-galactosyl-sn-glycerol_d0 -> 2 H_d0 + 1-9Z_12Z-octadecenoyl-2-9Z_12Z_15Z-octadecatrienoyl-3-O-alpha-D-galactosyl-1->6-O-beta-D-galactosyl-sn-glycerol_d0	((AT5G05580.1.CDS) or (AT5G05580.2.CDS) or (AT3G11170.1.CDS) or (AT2G29980.1.CDS) or (AT2G29980.2.CDS))
1_2-9Z_12Z-octadecadienoyl-3-O-alpha-D-galactosyl-1->6-O-beta-D-galactosyl-sn-glycerol_r0 -> 2 H_r0 + 1-9Z_12Z-octadecenoyl-2-9Z_12Z_15Z-octadecatrienoyl-3-O-alpha-D-galactosyl-1->6-O-beta-D-galactosyl-sn-glycerol_r0	((AT2G29980.1.CDS) or (AT2G29980.2.CDS))
1-9Z_12Z-octadecenoyl-2-9Z_12Z_15Z-octadecatrienoyl-3-O-alpha-D-galactosyl-1->6-O-beta-D-galactosyl-sn-glycerol_d0 -> 2 H_d0 + 1_2-9Z_12Z_15Z-octadecatrienoyl-3-O-alpha-D-galactosyl-1->6-O-beta-D-galactosyl-sn-glycerol_d0	((AT5G05580.1.CDS) or (AT5G05580.2.CDS) or (AT3G11170.1.CDS) or (AT2G29980.1.CDS) or (AT2G29980.2.CDS))
1-9Z_12Z-octadecenoyl-2-9Z_12Z_15Z-octadecatrienoyl-3-O-alpha-D-galactosyl-1->6-O-beta-D-galactosyl-sn-glycerol_r0 -> 2 H_r0 + 1_2-9Z_12Z_15Z-octadecatrienoyl-3-O-alpha-D-galactosyl-1->6-O-beta-D-galactosyl-sn-glycerol_r0	((AT2G29980.1.CDS) or (AT2G29980.2.CDS))
1-18_1-2-16_0-phosphatidylglycerol_d0 -> 2 H_d0 + 1-9Z_12Z-octadecadienoyl-2-hexadecanoyl-sn-glycero-3-phospho-1-sn-glycerol_d0	((AT4G30950.1.CDS) or (AT3G12120.2.CDS) or (AT3G12120.1.CDS))
1-18_1-2-16_0-phosphatidylglycerol_r0 -> 2 H_r0 + 1-9Z_12Z-octadecadienoyl-2-hexadecanoyl-sn-glycero-3-phospho-1-sn-glycerol_r0	((AT3G12120.2.CDS) or (AT3G12120.1.CDS))
1-9Z_12Z-octadecadienoyl-2-hexadecanoyl-sn-glycero-3-phospho-1-sn-glycerol_d0 -> 2 H_d0 + 1-9Z_12Z_15Z-octadecatrienoyl-2-hexadecanoyl-sn-glycero-3-phospho-1-sn-glycerol_d0	((AT5G05580.1.CDS) or (AT5G05580.2.CDS) or (AT3G11170.1.CDS) or (AT2G29980.1.CDS) or (AT2G29980.2.CDS))
1-9Z_12Z-octadecadienoyl-2-hexadecanoyl-sn-glycero-3-phospho-1-sn-glycerol_r0 -> 2 H_r0 + 1-9Z_12Z_15Z-octadecatrienoyl-2-hexadecanoyl-sn-glycero-3-phospho-1-sn-glycerol_r0	((AT2G29980.1.CDS) or (AT2G29980.2.CDS))
1-9Z_12Z-octadecadienoyl-2-hexadecanoyl-sn-glycero-3-phospho-1-sn-glycerol_d0 -> 2 H_d0 + 1-9Z_12Z-octadecadienoyl-2-3E-hexadecenoyl-sn-glycero-3-phospho-1-sn-glycerol_d0	((AT1G62190.1.CDS) or (AT2G22890.1.CDS) or (AT4G27030.1.CDS))
1-9Z_12Z_15Z-octadecatrienoyl-2-hexadecanoyl-sn-glycero-3-phospho-1-sn-glycerol_d0 -> 2 H_d0 + 1-9Z_12Z_15Z-octadecatrienoyl-2-3E-hexadecenoyl-sn-glycero-3-phospho-1-sn-glycerol_d0	((AT1G62190.1.CDS) or (AT2G22890.1.CDS) or (AT4G27030.1.CDS))
1_2-9Z-octadecenoyl-sn-glycero-3-phosphocholine_r0 -> 2 H_r0 + 1-18_2-2-18_1-phosphatidylcholine_r0	((AT3G12120.2.CDS) or (AT3G12120.1.CDS))
1-18_2-2-18_1-phosphatidylcholine_r0 -> 2 H_r0 + 1-18_3-2-18_1-phosphatidylcholine_r0	((AT2G29980.1.CDS) or (AT2G29980.2.CDS))
1-9Z-octadecenoyl-2-9Z_12Z-octadecadienoyl-sn-glycero-3-phosphocholine_r0 -> 2 H_r0 + 1_2-9Z_12Z-octadecadienoyl-sn-glycero-3-phosphocholine_r0	((AT3G12120.2.CDS) or (AT3G12120.1.CDS))
1_2-9Z_12Z-octadecadienoyl-sn-glycero-3-phosphocholine_r0 -> 2 H_r0 + 1-18_3-2-18_2-phosphatidylcholine_r0	((AT2G29980.1.CDS) or (AT2G29980.2.CDS))
1-9Z-octadecenoyl-2-9Z_12Z_15Z-octadecatrienoyl-sn-glycero-3-phosphocholine_r0 -> 2 H_r0 + 1-9Z_12Z-octadecadienoyl-2-9Z_12Z_15Z-octadecatrienoyl-sn-glycero-3-phosphocholine_r0	((AT3G12120.2.CDS) or (AT3G12120.1.CDS))
1-9Z_12Z-octadecadienoyl-2-9Z_12Z_15Z-octadecatrienoyl-sn-glycero-3-phosphocholine_r0 -> 2 H_r0 + 1_2-9Z_12Z_15Z-octadecatrienoyl-sn-glycero-3-phosphocholine_r0	((AT2G29980.1.CDS) or (AT2G29980.2.CDS))
1-9Z-octadecenoyl-2-9Z_12Z-octadecadienoyl-sn-glycero-3-phosphocholine_r0 -> 2 H_r0 + 1-9Z-octadecenoyl-2-9Z_12Z_15Z-octadecatrienoyl-sn-glycero-3-phosphocholine_r0	((AT2G29980.1.CDS) or (AT2G29980.2.CDS))
1_2-9Z-octadecenoyl-sn-glycero-3-phosphocholine_r0 -> 2 H_r0 + 1-9Z-octadecenoyl-2-9Z_12Z-octadecadienoyl-sn-glycero-3-phosphocholine_r0	((AT3G12120.2.CDS) or (AT3G12120.1.CDS))
1-18_2-2-18_1-phosphatidylcholine_r0 -> 2 H_r0 + 1_2-9Z_12Z-octadecadienoyl-sn-glycero-3-phosphocholine_r0	((AT3G12120.2.CDS) or (AT3G12120.1.CDS))
1_2-9Z_12Z-octadecadienoyl-sn-glycero-3-phosphocholine_r0 -> 2 H_r0 + 1-9Z_12Z-octadecadienoyl-2-9Z_12Z_15Z-octadecatrienoyl-sn-glycero-3-phosphocholine_r0	((AT2G29980.1.CDS) or (AT2G29980.2.CDS))
1-18_3-2-18_1-phosphatidylcholine_r0 -> 2 H_r0 + 1-18_3-2-18_2-phosphatidylcholine_r0	((AT3G12120.2.CDS) or (AT3G12120.1.CDS))
1-18_3-2-18_2-phosphatidylcholine_r0 -> 2 H_r0 + 1_2-9Z_12Z_15Z-octadecatrienoyl-sn-glycero-3-phosphocholine_r0	((AT2G29980.1.CDS) or (AT2G29980.2.CDS))
H2O_c0 + Pheophytin_a_c0 -> 2 H_c0 + Phytol_c0 + Pheophorbide_a_c0	((AT5G13800.1.CDS) or (AT5G13800.2.CDS))
H2O_d0 + Pheophytin_a_d0 -> 2 H_d0 + Phytol_d0 + Pheophorbide_a_d0	((AT5G13800.1.CDS) or (AT5G13800.2.CDS))
1-Hexadecanoyl-2-9Z-octadecenoyl-sn-glycero-3-phosphocholine_r0 -> 2 H_r0 + 1-16_0-2-18_2-phosphatidylcholine_r0	((AT3G12120.2.CDS) or (AT3G12120.1.CDS))
1-16_0-2-18_2-phosphatidylcholine_r0 -> 2 H_r0 + 1-16_0-2-18_3-phosphatidylcholine_r0	((AT2G29980.1.CDS) or (AT2G29980.2.CDS))
1-18_1-2-16_0-digalactosyldiacylglycerol_d0 -> 2 H_d0 + 1-18_2-2-16_0-digalactosyldiacylglycerol_d0	((AT4G30950.1.CDS) or (AT3G12120.2.CDS) or (AT3G12120.1.CDS))
1-18_1-2-16_0-digalactosyldiacylglycerol_r0 -> 2 H_r0 + 1-18_2-2-16_0-digalactosyldiacylglycerol_r0	((AT3G12120.2.CDS) or (AT3G12120.1.CDS))
1-18_2-2-16_0-digalactosyldiacylglycerol_d0 -> 2 H_d0 + 1-18_3-2-16_0-digalactosyldiacylglycerol_d0	((AT5G05580.1.CDS) or (AT5G05580.2.CDS) or (AT3G11170.1.CDS) or (AT2G29980.1.CDS) or (AT2G29980.2.CDS))
1-16_0-2-18_2-digalactosyldiacylglycerol_d0 -> 2 H_d0 + 1-16_0-2-18_3-digalactosyldiacylglycerol_d0	((AT5G05580.1.CDS) or (AT5G05580.2.CDS) or (AT3G11170.1.CDS) or (AT2G29980.1.CDS) or (AT2G29980.2.CDS))
1-16_0-2-18_2-digalactosyldiacylglycerol_r0 -> 2 H_r0 + 1-16_0-2-18_3-digalactosyldiacylglycerol_r0	((AT2G29980.1.CDS) or (AT2G29980.2.CDS))
1_2-9Z_12Z-octadecadienoyl-3-O-beta-D-galactosyl-sn-glycerol_d0 -> 2 H_d0 + 1-18_3-2-18_2-monogalactosyldiacylglycerol_d0	((AT5G05580.1.CDS) or (AT5G05580.2.CDS) or (AT3G11170.1.CDS) or (AT2G29980.1.CDS) or (AT2G29980.2.CDS))
1_2-9Z_12Z-octadecadienoyl-3-O-beta-D-galactosyl-sn-glycerol_d0 -> 2 H_d0 + 1-9Z_12Z-octadecadienoyl-2-9Z_12Z_15Z-octadecatrienoyl-3-O-beta-D-galactosyl-sn-glycerol_d0	((AT5G05580.1.CDS) or (AT5G05580.2.CDS) or (AT3G11170.1.CDS) or (AT2G29980.1.CDS) or (AT2G29980.2.CDS))
1-9Z_12Z-octadecadienoyl-2-9Z_12Z_15Z-octadecatrienoyl-3-O-beta-D-galactosyl-sn-glycerol_d0 -> 2 H_d0 + 1_2-9Z_12Z_15Z-octadecatrienoyl-3-O-beta-D-galactosyl-sn-glycerol_d0	((AT5G05580.1.CDS) or (AT5G05580.2.CDS) or (AT3G11170.1.CDS) or (AT2G29980.1.CDS) or (AT2G29980.2.CDS))
1-9Z_12Z-octadecadienoyl-2-9Z_12Z_15Z-octadecatrienoyl-3-O-beta-D-galactosyl-sn-glycerol_r0 -> 2 H_r0 + 1_2-9Z_12Z_15Z-octadecatrienoyl-3-O-beta-D-galactosyl-sn-glycerol_r0	((AT2G29980.1.CDS) or (AT2G29980.2.CDS))
1-18_3-2-18_2-monogalactosyldiacylglycerol_d0 -> 2 H_d0 + 1_2-9Z_12Z_15Z-octadecatrienoyl-3-O-beta-D-galactosyl-sn-glycerol_d0	((AT5G05580.1.CDS) or (AT5G05580.2.CDS) or (AT3G11170.1.CDS) or (AT2G29980.1.CDS) or (AT2G29980.2.CDS))
1-18_3-2-18_2-monogalactosyldiacylglycerol_r0 -> 2 H_r0 + 1_2-9Z_12Z_15Z-octadecatrienoyl-3-O-beta-D-galactosyl-sn-glycerol_r0	((AT2G29980.1.CDS) or (AT2G29980.2.CDS))
trans_trans-Farnesyl_diphosphate_c0 -> cpd00012[c] + H_c0 + alpha-Copaene_c0	((AT5G23960.1.CDS) or (AT5G23960.2.CDS))
trans_trans-Farnesyl_diphosphate_c0 -> cpd00012[c] + H_c0 + -thujopsene_c0	(AT5G44630.1.CDS)
trans_trans-Farnesyl_diphosphate_c0 -> cpd00012[c] + H_c0 + isobazzanene_c0	(AT5G44630.1.CDS)
trans_trans-Farnesyl_diphosphate_c0 -> cpd00012[c] + H_c0 + -beta-barbatene_c0	(AT5G44630.1.CDS)
trans_trans-Farnesyl_diphosphate_c0 -> cpd00012[c] + H_c0 + beta-acoradiene_c0	(AT5G44630.1.CDS)
trans_trans-Farnesyl_diphosphate_c0 -> cpd00012[c] + H_c0 + -beta-Chamigrene_c0	(AT5G44630.1.CDS)
trans_trans-Farnesyl_diphosphate_c0 -> cpd00012[c] + H_c0 + alpha-Chamigrene_c0	(AT5G44630.1.CDS)
trans_trans-Farnesyl_diphosphate_c0 -> cpd00012[c] + H_c0 + delta-cuprenene_c0	(AT5G44630.1.CDS)
trans_trans-Farnesyl_diphosphate_c0 -> cpd00012[c] + H_c0 + beta-Elemene_c0	((AT5G23960.1.CDS) or (AT5G23960.2.CDS))
H_c0 + Oxygen_c0 + NADPH_c0 + E_E-geranyllinalool_c0 -> 2 H2O_c0 + NADP_c0 + 1-buten-3-one_c0 + 4_8_12-trimethyl-1_3_7_11-tridecatetraene_c0	((AT3G25180.2.CDS) or (AT3G25180.1.CDS))
ATP_c0 + Indole-3-acetate_c0 + L-Valine_c0 -> cpd00012[c] + 2 H_c0 + AMP_c0 + IAA-Val_c0	((AT5G54510.1.CDS) or (AT4G27260.1.CDS) or (AT2G23170.1.CDS))
ATP_c0 + L-Phenylalanine_c0 + Indole-3-acetate_c0 -> cpd00012[c] + 2 H_c0 + AMP_c0 + IAA-Phe_c0	((AT5G54510.1.CDS) or (AT1G59500.1.CDS) or (AT1G28130.2.CDS) or (AT4G27260.1.CDS) or (AT1G28130.1.CDS) or (AT2G23170.1.CDS) or (AT4G37390.1.CDS))
H2O_x0 + 1_4-Dihydroxy-2-naphthoyl-CoA_x0 -> H_x0 + CoA_x0 + 1_4-Dihydroxy-2-naphthoate_x0	((AT1G48320.1.CDS) or (AT5G48950.2.CDS) or (AT5G48950.1.CDS))
Oxygen_c0 + 2-Oxoglutarate_c0 + Gibberellin_A12_c0 -> CO2_c0 + Succinate_c0 + GA110_c0	((AT4G21200.1.CDS) or (AT1G50960.1.CDS) or (AT4G21200.3.CDS) or (AT4G21200.2.CDS))
Butyryl-acp_m0 + Malonyl-acyl-carrier_protein_m0 -> CO2_m0 + Acyl-carrier_protein_m0 + 3-Oxohexanoyl-acp_m0	((AT5G46290.2.CDS) or (AT5G46290.1.CDS) or (AT5G46290.3.CDS))
H2O_d0 + Palmitoleoyl-ACPs_d0 -> H_d0 + Acyl-carrier_protein_d0 + 9Z-Hexadecenoic_acid_d0	((AT1G08510.1.CDS) or (AT4G13050.1.CDS) or (AT3G25110.1.CDS))
NADP_c0 + 16-Hydroxypalmitate_c0 -> H_c0 + NADPH_c0 + 16-Oxo-palmitate_c0	((AT1G72970.2.CDS) or (AT1G72970.1.CDS))
Oxygen_c0 + 2-Oxoglutarate_c0 + Gibberellin_A53_c0 -> CO2_c0 + Succinate_c0 + GA97_c0	((AT4G21200.1.CDS) or (AT1G50960.1.CDS) or (AT4G21200.3.CDS) or (AT4G21200.2.CDS))
Acetyl-CoA_c0 + Pyruvate-dehydrogenase-dihydrolipoate_c0 -> CoA_c0 + Pyruvate-dehydrogenase-acetylDHlipoyl_c0	((AT1G34430.1.CDS) or (AT3G52200.1.CDS) or (AT1G54220.2.CDS) or (AT3G52200.2.CDS) or (AT3G25860.1.CDS) or (AT3G13930.1.CDS) or (AT1G54220.1.CDS))
Lactose_c0 -> allolactose_c0	((AT4G35010.1.CDS) or (AT5G63800.1.CDS) or (AT5G56870.1.CDS) or (AT1G31740.1.CDS) or (AT2G16730.1.CDS) or (AT5G20710.1.CDS))
Lycopene_d0 -> delta-Carotene_d0	((AT5G12000.1.CDS) or (AT5G57030.1.CDS))
H_c0 + Kaempferol_3-O-glucoside_c0 + dTDP-6-deoxy-L-mannose_c0 -> dTDP_c0 + kaempferol-3-O-glucopyranoside-7-O-rhamnopyranoside_c0	(AT1G06000.1.CDS)
H_c0 + dTDP-6-deoxy-L-mannose_c0 + kaempferol-3-O-rhamnopyranoside_c0 -> dTDP_c0 + kaempferol-3-O-rhamnopyranoside-7-O-rhamnopyranoside_c0	(AT1G06000.1.CDS)
H_r0 + NADPH_r0 + Oxygen_r0 + Sphinganine_r0 -> H2O_r0 + NADP_r0 + Phytosphingosine_r0	((AT1G69640.1.CDS) or (AT1G14290.1.CDS))
Oxidized-ferredoxins_d0 + Plastocyanin-Reduced_d0 + hn_d0 -> Reduced-ferredoxins_d0 + Oxidized-Plastocyanins_d0	((AT1G31330.1.CDS) or (ATCG00510.1.CDS) or (AT2G46820.2.CDS) or (ATCG00350.1.CDS) or (AT1G20020.2.CDS) or (AT5G64040.1.CDS) or (AT5G66190.2.CDS) or (ATCG01060.1.CDS) or (AT4G02770.1.CDS) or (AT1G30510.3.CDS) or (AT5G66190.1.CDS) or (ATCG00630.1.CDS) or (AT5G64040.2.CDS) or (AT1G30510.1.CDS) or (ATCG00360.1.CDS) or (AT1G03130.1.CDS) or (AT4G28750.1.CDS) or (AT4G05390.2.CDS) or (AT1G08380.1.CDS) or…
H_c0 + UDP-L-rhamnose_c0 + glucosyl_3-quercetin_c0 -> UDP_c0 + quercetin-3-O-glucoside-7-O-rhamnoside_c0	(AT1G06000.1.CDS)
NAD_c0 + Glycine_c0 + L-Cysteine_c0 -> 3 H2O_c0 + L-Alanine_c0 + Nicotinamide_c0 + 2-carboxylate-4-methyl-5-beta-ethyl_adenosine_5-diphosphate_thiazole_c0	(AT5G54770.1.CDS)
NAD_d0 + Glycine_d0 + L-Cysteine_d0 -> 3 H2O_d0 + L-Alanine_d0 + Nicotinamide_d0 + 2-carboxylate-4-methyl-5-beta-ethyl_adenosine_5-diphosphate_thiazole_d0	(AT5G54770.1.CDS)
NAD_m0 + L-Cysteine_m0 + Glycine_m0 -> 3 H2O_m0 + L-Alanine_m0 + Nicotinamide_m0 + 2-carboxylate-4-methyl-5-beta-ethyl_adenosine_5-diphosphate_thiazole_m0	(AT5G54770.1.CDS)
H2O_c0 + 2-carboxylate-4-methyl-5-beta-ethyl_adenosine_5-diphosphate_thiazole_c0 -> H_c0 + CO2_c0 + AMP_c0 + 4-Methyl-5-2-phosphoethyl-thiazole_c0	(AT5G54770.1.CDS)
H2O_d0 + 2-carboxylate-4-methyl-5-beta-ethyl_adenosine_5-diphosphate_thiazole_d0 -> H_d0 + CO2_d0 + AMP_d0 + 4-Methyl-5-2-phosphoethyl-thiazole_d0	(AT5G54770.1.CDS)
H2O_m0 + 2-carboxylate-4-methyl-5-beta-ethyl_adenosine_5-diphosphate_thiazole_m0 -> H_m0 + CO2_m0 + AMP_m0 + 4-Methyl-5-2-phosphoethyl-thiazole_m0	(AT5G54770.1.CDS)
2 H_r0 + 2 NADPH_r0 + 2 Oxygen_r0 + Dihomomethionine_r0 -> 3 H2O_r0 + 2 NADP_r0 + CO2_r0 + 5-Methylthiopentanaldoxime_r0	((AT1G16410.1.CDS) or (AT1G16410.2.CDS))
2 H_r0 + 2 NADPH_r0 + 2 Oxygen_r0 + Trihomomethionine_r0 -> 3 H2O_r0 + 2 NADP_r0 + CO2_r0 + 6-Methylthiohexanaldoxime_r0	((AT1G16410.1.CDS) or (AT1G16410.2.CDS))
2 H_r0 + 2 NADPH_r0 + 2 Oxygen_r0 + Tetrahomomethionine_r0 -> 3 H2O_r0 + 2 NADP_r0 + CO2_r0 + 7-Methylthioheptanaldoxime_r0	((AT1G16410.1.CDS) or (AT1G16410.2.CDS))
2 H_r0 + 2 NADPH_r0 + 2 Oxygen_r0 + Pentahomomethionine_r0 -> 3 H2O_r0 + 2 NADP_r0 + CO2_r0 + 8-Methylthiooctanaldoxime_r0	((AT1G16410.1.CDS) or (AT1G16410.2.CDS) or (AT1G16400.1.CDS))
2 H_r0 + 2 NADPH_r0 + 2 Oxygen_r0 + Hexahomomethionine_r0 -> 3 H2O_r0 + 2 NADP_r0 + CO2_r0 + 9-Methylthiononanaldoxime_r0	((AT1G16410.1.CDS) or (AT1G16410.2.CDS) or (AT1G16400.1.CDS))
H_c0 + Oxygen_c0 + NADPH_c0 + L-Cysteine_c0 + 5-Methylthiopentanaldoxime_c0 -> 2 H2O_c0 + NADP_c0 + S-5-methylthiopentylhydroximoyl-L-cysteine_c0	(AT4G13770.1.CDS)
H_r0 + NADPH_r0 + Oxygen_r0 + 5-Methylthiopentanaldoxime_r0 + L-Cysteine_r0 -> 2 H2O_r0 + NADP_r0 + S-5-methylthiopentylhydroximoyl-L-cysteine_r0	(AT4G13770.1.CDS)
H_c0 + Oxygen_c0 + NADPH_c0 + L-Cysteine_c0 + 6-Methylthiohexanaldoxime_c0 -> 2 H2O_c0 + NADP_c0 + S-6-methylthiohexylhydroximoyl-L-cysteine_c0	(AT4G13770.1.CDS)
H_r0 + NADPH_r0 + Oxygen_r0 + 6-Methylthiohexanaldoxime_r0 + L-Cysteine_r0 -> 2 H2O_r0 + NADP_r0 + S-6-methylthiohexylhydroximoyl-L-cysteine_r0	(AT4G13770.1.CDS)
H_c0 + Oxygen_c0 + NADPH_c0 + L-Cysteine_c0 + 7-Methylthioheptanaldoxime_c0 -> 2 H2O_c0 + NADP_c0 + S-7-methylthioheptylhydroximoyl-L-cysteine_c0	(AT4G13770.1.CDS)
H_r0 + NADPH_r0 + Oxygen_r0 + 7-Methylthioheptanaldoxime_r0 + L-Cysteine_r0 -> 2 H2O_r0 + NADP_r0 + S-7-methylthioheptylhydroximoyl-L-cysteine_r0	(AT4G13770.1.CDS)
H_c0 + Oxygen_c0 + NADPH_c0 + L-Cysteine_c0 + 8-Methylthiooctanaldoxime_c0 -> 2 H2O_c0 + NADP_c0 + S-8-methylthiooctylhydroximoyl-L-cysteine_c0	(AT4G13770.1.CDS)
H_r0 + NADPH_r0 + Oxygen_r0 + 8-Methylthiooctanaldoxime_r0 + L-Cysteine_r0 -> 2 H2O_r0 + NADP_r0 + S-8-methylthiooctylhydroximoyl-L-cysteine_r0	(AT4G13770.1.CDS)
H_c0 + Oxygen_c0 + NADPH_c0 + L-Cysteine_c0 + 9-Methylthiononanaldoxime_c0 -> 2 H2O_c0 + NADP_c0 + S-9-methylthiononylhydroximoyl-L-cysteine_c0	(AT4G13770.1.CDS)
H_r0 + NADPH_r0 + Oxygen_r0 + 9-Methylthiononanaldoxime_r0 + L-Cysteine_r0 -> 2 H2O_r0 + NADP_r0 + S-9-methylthiononylhydroximoyl-L-cysteine_r0	(AT4G13770.1.CDS)
Oxygen_c0 + Glucoraphanin_c0 -> H_c0 + Methanesulfonic_acid_c0 + Gluconapin_c0	(AT4G03070.1.CDS)
Succinate_m0 + Ubiquinone-8_m0 -> Fumarate_m0 + ubiquinol8_m0	((AT4G32210.1.CDS) or (AT3G27380.1.CDS) or (AT2G46505.1.CDS) or (AT3G27380.2.CDS) or (AT1G08480.1.CDS) or (AT5G65165.1.CDS) or (AT5G66760.1.CDS) or (AT5G09600.2.CDS) or (AT5G09600.1.CDS) or (AT5G62575.1.CDS) or (AT5G62575.2.CDS) or (AT1G47420.1.CDS) or (AT3G47833.1.CDS) or (AT5G40650.1.CDS) or (AT2G18450.1.CDS) or (AT5G09600.3.CDS))
ADP_x0 + Sulfate_x0 -> Orthophosphate_x0 + Adenylyl_sulfate_x0	(AT4G16566.1.CDS)
NADPH_c0 + Ox-Thioredoxin_c0 -> H_c0 + NADP_c0 + Red-Thioredoxin_c0	((AT4G35460.1.CDS) or (AT2G41680.1.CDS) or (AT2G17420.1.CDS))
H2O_d0 + ATP_d0 + Copper_d0 -> Orthophosphate_d0 + H_d0 + ADP_d0 + Copper_c0	((AT4G33520.2.CDS) or (AT5G21930.3.CDS) or (AT4G33520.1.CDS) or (AT5G21930.2.CDS) or (AT4G37270.1.CDS) or (AT5G21930.1.CDS) or (AT4G33520.3.CDS))
Hydroxymethylbilane_d0 -> H2O_d0 + Uroporphyrinogen_III_d0	(AT2G26540.1.CDS)
NAD_d0 + sn-Glycerol_3-phosphate_d0 -> H_d0 + NADH_d0 + Glycerone_phosphate_d0	((AT5G40610.1.CDS) or (AT2G41540.2.CDS) or (AT2G40690.1.CDS) or (AT2G41540.3.CDS) or (AT2G41540.1.CDS))
H_r0 + NADPH_r0 + Oxygen_r0 + Abscisate_r0 -> H2O_r0 + NADP_r0 + 8-Hydroxyabscisate_r0	((AT5G45340.2.CDS) or (AT5G45340.1.CDS))
2-Oxoglutarate_d0 + L-Tyrosine_d0 -> L-Glutamate_d0 + 3-4-Hydroxyphenylpyruvate_d0	((AT5G10330.2.CDS) or (AT2G22250.3.CDS) or (AT4G31990.3.CDS) or (AT4G31990.4.CDS) or (AT1G71920.3.CDS) or (AT1G71920.2.CDS) or (AT2G22250.1.CDS) or (AT4G31990.1.CDS) or (AT1G71920.1.CDS) or (AT5G11520.1.CDS) or (AT5G10330.1.CDS) or (AT5G10330.3.CDS) or (AT2G22250.2.CDS) or (AT4G31990.2.CDS))
H2O_c0 + ATP_c0 + Calcium_cation_c0 -> Orthophosphate_c0 + H_c0 + ADP_c0 + Calcium_cation_g0	((AT5G57110.1.CDS) or (AT1G27770.1.CDS) or (AT1G07810.1.CDS) or (AT4G37640.1.CDS) or (AT1G07670.1.CDS) or (AT3G21180.1.CDS) or (AT2G41560.1.CDS) or (AT3G22910.1.CDS) or (AT1G27770.2.CDS) or (AT5G57110.2.CDS) or (AT4G37270.1.CDS) or (AT4G00900.1.CDS) or (AT2G22950.1.CDS) or (AT4G29900.1.CDS) or (AT3G63380.1.CDS) or (AT1G10130.1.CDS) or (AT3G57330.1.CDS) or (AT5G53010.1.CDS))
CO2_d0 + S-2-Acetolactate_d0 -> H_d0 + 2 Pyruvate_d0	((AT2G31810.2.CDS) or (AT3G48560.1.CDS) or (AT2G31810.3.CDS) or (AT2G31810.1.CDS) or (AT5G16290.1.CDS) or (AT5G16290.2.CDS))
H_d0 + Pyruvate_d0 + 2-Oxobutanoate_d0 -> CO2_d0 + 2-Aceto-2-hydroxybutanoate_d0	((AT2G31810.2.CDS) or (AT3G48560.1.CDS) or (AT2G31810.3.CDS) or (AT2G31810.1.CDS) or (AT5G16290.1.CDS) or (AT5G16290.2.CDS))
2-Oxoglutarate_d0 + L-Aspartate_d0 -> L-Glutamate_d0 + Oxaloacetate_d0	((AT2G22250.3.CDS) or (AT4G31990.3.CDS) or (AT4G31990.4.CDS) or (AT2G22250.1.CDS) or (AT4G31990.1.CDS) or (AT5G11520.1.CDS) or (AT2G22250.2.CDS) or (AT4G31990.2.CDS))
Diphosphate_d0 + CDP-1-18_19Z-2-16_0-glycerol_d0 -> CTP_d0 + 1-9Z-octadecenoyl-2-hexadecanoyl-sn-glycero-3-phosphate_d0	((AT2G45150.1.CDS) or (AT2G45150.2.CDS) or (AT3G60620.1.CDS) or (AT2G45150.3.CDS))
Diphosphate_d0 + CDP-1_2-dioctadecenoylglycerol_d0 -> CTP_d0 + 1_2-9Z-octadecenoyl-sn-glycero-3-phosphate_d0	((AT4G26770.1.CDS) or (AT2G45150.2.CDS) or (AT2G45150.1.CDS) or (AT4G22340.2.CDS) or (AT1G62430.1.CDS) or (AT3G60620.1.CDS) or (AT2G45150.3.CDS) or (AT4G22340.1.CDS) or (AT4G22340.3.CDS))
ATP_d0 + L-Glutamate_d0 + Tetrahydrofolate_d0 -> Orthophosphate_d0 + H_d0 + ADP_d0 + Tetrahydrofolyl-Glu2_d0	((AT5G05980.2.CDS) or (AT5G05980.1.CDS))
ATP_m0 + L-Glutamate_m0 + Tetrahydrofolate_m0 -> H_m0 + ADP_m0 + Orthophosphate_m0 + Tetrahydrofolyl-Glu2_m0	((AT5G41480.1.CDS) or (AT3G10160.1.CDS))
NADP_d0 + sn-Glycerol_3-phosphate_d0 -> H_d0 + NADPH_d0 + Glycerone_phosphate_d0	((AT5G40610.1.CDS) or (AT2G41540.2.CDS) or (AT2G40690.1.CDS) or (AT2G41540.3.CDS) or (AT2G41540.1.CDS))
H_d0 + Acyl-carrier_protein_d0 + Malonyl-CoA_d0 -> CoA_d0 + Malonyl-acyl-carrier_protein_d0	((AT2G30200.1.CDS) or (AT2G30200.2.CDS))
Peptidylproline_omega=180_n0 -> Peptidylproline_omega=0_n0	(AT4G34870.1.CDS)
H2O_d0 + dipalmitoyl_phosphatidate_d0 -> Orthophosphate_d0 + 1_2-dipalmitoylglycerol_d0	((AT3G02600.2.CDS) or (AT5G03080.1.CDS) or (AT3G18220.1.CDS) or (AT3G02600.3.CDS) or (AT2G01180.2.CDS) or (AT3G58490.1.CDS) or (AT3G02600.4.CDS) or (AT3G50920.2.CDS) or (AT3G50920.1.CDS) or (AT5G66450.2.CDS) or (AT3G58490.2.CDS) or (AT3G02600.1.CDS) or (AT1G15080.1.CDS) or (AT5G66450.1.CDS) or (AT3G02600.5.CDS) or (AT2G01180.1.CDS))
ATP_d0 + D-Ribulose_5-phosphate_d0 -> H_d0 + ADP_d0 + D-Ribulose_1_5-bisphosphate_d0	((AT2G47400.1.CDS) or (AT3G62410.1.CDS) or (AT1G32060.1.CDS))
L-Glutamate_d0 + Prephenate_d0 -> 2-Oxoglutarate_d0 + L-Arogenate_d0	((AT2G22250.3.CDS) or (AT2G22250.2.CDS) or (AT2G22250.1.CDS))
Fe2_d0 + Protoporphyrin_d0 -> 2 H_d0 + Heme_d0	((AT2G30390.2.CDS) or (AT2G30390.1.CDS) or (AT5G26030.1.CDS) or (AT5G26030.2.CDS))
H2O_d0 + ADP-ribose_d0 -> 2 H_d0 + AMP_d0 + alpha-D-Ribose_1-phosphate_d0	((AT2G29630.2.CDS) or (AT4G11980.1.CDS) or (AT2G29630.3.CDS) or (AT2G29630.1.CDS))
4 H_c0 -> 4 H_e0	((ATCG01070.1.CDS) or (ATCG00430.1.CDS) or (AT4G05020.1.CDS) or (ATCG00440.1.CDS) or (ATMG00990.1.CDS) or (ATCG01110.1.CDS) or (AT3G18410.1.CDS) or (AT2G29990.1.CDS) or (AT5G58260.1.CDS) or (AT2G20800.1.CDS) or (AT4G28220.1.CDS) or (AT1G19580.1.CDS) or (AT4G28005.1.CDS) or (AT4G16450.2.CDS) or (AT1G19580.2.CDS) or (AT3G62790.1.CDS) or (AT1G70760.1.CDS) or (ATCG01250.1.CDS) or (AT4G05020.2.CDS) or…
sn-Glycerol_3-phosphate_m0 + Palmitoyl-CoA_m0 -> CoA_m0 + 1-Palmitoylglycerol_3-phosphate_m0	((AT4G01950.1.CDS) or (AT1G06520.1.CDS) or (AT1G32200.1.CDS) or (AT1G32200.2.CDS) or (AT1G02390.1.CDS) or (AT5G60620.1.CDS))
sn-Glycerol_3-phosphate_m0 + Stearoyl-CoA_m0 -> CoA_m0 + 1-octadecanoyl-sn-glycerol_3-phosphate_m0	((AT4G01950.1.CDS) or (AT1G06520.1.CDS) or (AT1G32200.1.CDS) or (AT1G32200.2.CDS) or (AT1G02390.1.CDS) or (AT5G60620.1.CDS))
Palmitoyl-CoA_r0 + sn-Glycerol_3-phosphate_r0 -> CoA_r0 + 1-Palmitoylglycerol_3-phosphate_r0	(AT1G06520.1.CDS)
Stearoyl-CoA_r0 + sn-Glycerol_3-phosphate_r0 -> CoA_r0 + 1-octadecanoyl-sn-glycerol_3-phosphate_r0	(AT1G06520.1.CDS)
S-Adenosyl-L-methionine_d0 + 3-phytyl-1_4-naphtoquinol_d0 -> 3 H_d0 + S-Adenosyl-L-homocysteine_d0 + Phylloquinol_d0	((AT1G23360.3.CDS) or (AT1G23360.2.CDS) or (AT1G23360.1.CDS))
H_r0 + NADPH_r0 + Naringenin_r0 + Oxygen_r0 -> H2O_r0 + NADP_r0 + Eriodictyol_r0	((AT3G25180.2.CDS) or (AT5G07990.1.CDS) or (AT3G25180.1.CDS))
delta-Carotene_d0 -> epsilon-Carotene_d0	(AT5G12000.1.CDS)
H2O_d0 + Cis-vaccenoyl-ACPs_d0 -> H_d0 + Acyl-carrier_protein_d0 + Z-11-octadecenoic_acid_d0	((AT1G08510.1.CDS) or (AT4G13050.1.CDS) or (AT3G25110.1.CDS))
CoA_d0 + Pyruvate-dehydrogenase-acetylDHlipoyl_d0 -> Acetyl-CoA_d0 + Pyruvate-dehydrogenase-dihydrolipoate_d0	((AT1G34430.1.CDS) or (AT3G25860.1.CDS))
L-Cysteine_d0 + L-Cysteine-Desulfurases_d0 -> L-Alanine_d0 + Persulfurated-L-cysteine-desulfurases_d0	((AT5G65720.1.CDS) or (AT5G65720.2.CDS) or (AT1G08490.1.CDS))
Violaxanthin_d0 -> trans-neoxanthin_d0	(AT1G67080.1.CDS)
H_c0 + Oxygen_c0 + NADPH_c0 + Indolepyruvate_c0 -> H2O_c0 + CO2_c0 + NADP_c0 + Indole-3-acetate_c0	((AT4G13260.1.CDS) or (AT4G32540.1.CDS))
sn-Glycerol_3-phosphate_m0 + 9Z-octadec-9-enoyl-CoA_m0 -> CoA_m0 + 1-Acyl-sn-glycerol_3-phosphate_m0	(AT1G06520.1.CDS)
9Z-octadec-9-enoyl-CoA_r0 + sn-Glycerol_3-phosphate_r0 -> CoA_r0 + 1-Acyl-sn-glycerol_3-phosphate_r0	(AT1G06520.1.CDS)
Fe2_d0 + Sirohydrochlorin_d0 -> 2 H_d0 + Siroheme_d0	(AT1G50170.1.CDS)
4 Isopentenyl_diphosphate_d0 + trans_trans-Farnesyl_diphosphate_d0 -> 4 Diphosphate_d0 + 4 H_d0 + all-trans-Heptaprenyl_diphosphate_d0	((AT5G58780.1.CDS) or (AT1G78510.2.CDS) or (AT1G17050.1.CDS) or (AT1G78510.1.CDS))
trans_trans-Farnesyl_diphosphate_r0 + 4 Isopentenyl_diphosphate_r0 -> 4 H_r0 + 4 Diphosphate_r0 + all-trans-Heptaprenyl_diphosphate_r0	((AT5G58780.1.CDS) or (AT1G78510.2.CDS) or (AT1G78510.1.CDS))
2 H_c0 -> 2 H_e0	((AT4G03280.1.CDS) or (AT4G03280.2.CDS))
H2O_m0 + alpha_alpha-Trehalose_6-phosphate_m0 -> Orthophosphate_m0 + alpha_alpha-Trehalose_m0	((AT5G65140.1.CDS) or (AT1G22210.1.CDS) or (AT1G68020.2.CDS) or (AT4G39770.1.CDS) or (AT5G10100.1.CDS) or (AT4G22590.1.CDS) or (AT2G18700.1.CDS) or (AT4G17770.1.CDS) or (AT2G22190.1.CDS) or (AT1G23870.1.CDS) or (AT1G06410.1.CDS) or (AT4G12430.1.CDS) or (AT1G35910.1.CDS) or (AT5G65140.2.CDS) or (AT1G78090.1.CDS) or (AT1G68020.1.CDS) or (AT1G70290.1.CDS) or (AT5G10100.2.CDS) or (AT5G51460.1.CDS) or…
Malonyl-acyl-carrier_protein_d0 + Butyryl-acp_d0 -> CO2_d0 + 3-Oxohexanoyl-acp_d0 + Acyl-carrier_protein_d0	((AT5G46290.2.CDS) or (AT5G46290.1.CDS) or (AT5G46290.3.CDS))
H_d0 + Thiamin_diphosphate_d0 + Pyruvate_d0 -> 2-alpha-Hydroxyethylthiamine_diphosphate_d0 + CO2_d0	((AT2G31810.3.CDS) or (AT2G31810.1.CDS) or (AT1G30120.1.CDS) or (AT5G16290.1.CDS) or (AT2G34590.1.CDS) or (AT5G16290.2.CDS) or (AT2G31810.2.CDS) or (AT3G48560.1.CDS) or (AT1G01090.1.CDS))
1_2-9Z_12Z-octadecadienoyl-3-O-beta-D-galactosyl-sn-glycerol_r0 -> 2 H_r0 + 1-9Z_12Z-octadecadienoyl-2-9Z_12Z_15Z-octadecatrienoyl-3-O-beta-D-galactosyl-sn-glycerol_r0	((AT2G29980.1.CDS) or (AT2G29980.2.CDS))
1-9Z-octadecenoyl-2-7Z_10Z-hexadecadienoyl-3-O-beta-D-galactosyl-sn-glycerol_r0 -> 2 H_r0 + 1-9Z-octadecenoyl-2-7Z_10Z_13Z-hexadecatrienoyl-3-O-beta-D-galactosyl-sn-glycerol_r0	((AT2G29980.1.CDS) or (AT2G29980.2.CDS))
1_2-9Z_12Z-octadecadienoyl-3-O-beta-D-galactosyl-sn-glycerol_r0 -> 2 H_r0 + 1-18_3-2-18_2-monogalactosyldiacylglycerol_r0	((AT2G29980.1.CDS) or (AT2G29980.2.CDS))
1-9Z_12Z-octadecadienoyl-2-7Z_10Z-hexadecadienoyl-3-O-beta-D-galactosyl-sn-glycerol_r0 -> 2 H_r0 + 1-9Z_12Z-octadecadienoyl-2-7Z_10Z_13Z-hexadecatrienoyl-3-O-beta-D-galactosyl-sn-glycerol_r0	((AT2G29980.1.CDS) or (AT2G29980.2.CDS))
1-9Z_12Z-octadecadienoyl-2-7Z_10Z_13Z-hexadecatrienoyl-3-O-beta-D-galactosyl-sn-glycerol_r0 -> 2 H_r0 + 1-9Z_12Z_15Z-octadecatrienoyl-2-7Z_10Z_13Z-hexadecatrienoyl-3-O-beta-D-galactosyl-sn-glycerol_r0	((AT2G29980.1.CDS) or (AT2G29980.2.CDS))
1-9Z_12Z-octadecadienoyl-2-hexadecanoyl-3-O-beta-D-galactosyl-sn-glycerol_r0 -> 2 H_r0 + 1-9Z_12Z_15Z-octadecatrienoyl-2-hexadecanoyl-3-O-beta-D-galactosyl-sn-glycerol_r0	((AT2G29980.1.CDS) or (AT2G29980.2.CDS))
NADP_d0 + Glycolate_d0 -> H_d0 + NADPH_d0 + Glyoxylate_d0	(AT1G17650.1.CDS)
1-9Z_12Z_15Z-octadecatrienoyl-2-7Z_10Z-hexadecadienoyl-3-O-beta-D-galactosyl-sn-glycerol_r0 -> 2 H_r0 + 1-9Z_12Z_15Z-octadecatrienoyl-2-7Z_10Z_13Z-hexadecatrienoyl-3-O-beta-D-galactosyl-sn-glycerol_r0	((AT2G29980.1.CDS) or (AT2G29980.2.CDS))
ATP_d0 + FMN_d0 -> Diphosphate_d0 + FAD_d0	((AT5G08340.1.CDS) or (AT5G23330.1.CDS) or (AT5G08340.2.CDS))
ATP_d0 + GTP_d0 -> 2 H_d0 + AMP_d0 + Guanosine_3-diphosphate_5-triphosphate_d0	((AT3G14050.1.CDS) or (AT3G17470.1.CDS))
1-9Z_12Z-octadecadienoyl-2-7Z_10Z-hexadecadienoyl-3-O-beta-D-galactosyl-sn-glycerol_r0 -> 2 H_r0 + 1-9Z_12Z_15Z-octadecatrienoyl-2-7Z_10Z-hexadecadienoyl-3-O-beta-D-galactosyl-sn-glycerol_r0	((AT2G29980.1.CDS) or (AT2G29980.2.CDS))
H2O_d0 + NAD_d0 -> 2 H_d0 + AMP_d0 + Nicotinamide_D-ribonucleotide_d0	(AT5G20070.1.CDS)
H2O_d0 + ADP-glucose_d0 -> 2 H_d0 + AMP_d0 + D-Glucose_1-phosphate_d0	(AT4G11980.1.CDS)
1-18_2-2-16_0-digalactosyldiacylglycerol_r0 -> 2 H_r0 + 1-18_3-2-16_0-digalactosyldiacylglycerol_r0	((AT2G29980.1.CDS) or (AT2G29980.2.CDS))
1-9Z_12Z-octadecadienoyl-2-7Z-hexadecenoyl-3-O-beta-D-galactosyl-sn-glycerol_r0 -> 2 H_r0 + 1-9Z_12Z_15Z-octadecatrienoyl-2-7Z-hexadecenoyl-3-O-beta-D-galactosyl-sn-glycerol_r0	((AT2G29980.1.CDS) or (AT2G29980.2.CDS))
1_2-dibutyrin_c0 + Butanoyl-CoA_c0 -> CoA_c0 + Tributyrin_c0	((AT2G19450.1.CDS) or (AT1G48300.1.CDS))
1_2-dibutyrin_r0 + Butanoyl-CoA_r0 -> CoA_r0 + Tributyrin_r0	((AT5G37300.1.CDS) or (AT2G19450.1.CDS) or (AT1G48300.1.CDS) or (AT5G53390.1.CDS) or (AT3G51520.1.CDS))
UDP-glucose_c0 + Quercetin_c0 -> UDP_c0 + glucosyl_3-quercetin_c0	((AT4G34138.1.CDS) or (AT1G01420.1.CDS) or (AT3G16520.3.CDS) or (AT2G15490.3.CDS) or (AT3G46670.1.CDS) or (AT5G17030.1.CDS) or (AT1G73880.1.CDS) or (AT3G16520.1.CDS) or (AT2G15480.2.CDS) or (AT2G15490.1.CDS) or (AT1G30530.1.CDS) or (AT3G46660.1.CDS) or (AT5G59580.1.CDS) or (AT1G07250.1.CDS) or (AT2G36790.1.CDS) or (AT3G21800.1.CDS) or (AT4G34135.1.CDS) or (AT2G29730.1.CDS) or (AT2G29740.1.CDS) or…
ATP_c0 + L-Isoleucine_c0 + -7-Isojasmonic_acid_c0 -> cpd00012[c] + 2 H_c0 + AMP_c0 + -7-iso-JA-L-Ile_c0	((AT2G46370.4.CDS) or (AT2G46370.3.CDS) or (AT2G46370.2.CDS) or (AT2G46370.1.CDS))
UDP-glucose_c0 + Quercetin_c0 -> UDP_c0 + quercetin_4-O-glucoside_c0	((AT5G55120.1.CDS) or (AT3G16520.3.CDS) or (AT1G73880.1.CDS) or (AT3G16520.1.CDS) or (AT2G43840.1.CDS) or (AT2G43840.2.CDS) or (AT2G36800.1.CDS) or (AT2G36790.1.CDS) or (AT3G16520.2.CDS) or (AT3G21800.1.CDS) or (AT4G26850.1.CDS))
H_c0 + UDP-glucose_c0 + Indolebutyric_acid_c0 -> UDP_c0 + IBA-Glc_c0	(AT1G05680.1.CDS)
UDP-glucose_c0 + Salicylate_c0 -> UDP_c0 + 2-O-beta-glucopyranosylsalicylic_acid_c0	((AT2G43840.2.CDS) or (AT2G43820.1.CDS) or (AT2G43840.1.CDS))
H_c0 + UDP-glucose_c0 + Salicylate_c0 -> UDP_c0 + 2-hydroxybenzoic_acid_glucose_ester_c0	(AT2G43820.1.CDS)
H_c0 + UDP-glucose_c0 + Benzoate_c0 -> UDP_c0 + benzenecarboxylic_acid_beta-D-glucose_ester_c0	((AT2G43840.2.CDS) or (AT2G43820.1.CDS) or (AT2G43840.1.CDS))
UDP-glucose_c0 + 2_5-Dihydroxybenzoate_c0 -> UDP_c0 + 2_5-dihydroxybenzoate_5-O-beta-D-glucoside_c0	((AT3G21750.1.CDS) or (AT1G73880.1.CDS))
H_c0 + UDP-glucose_c0 + Anthranilate_c0 -> UDP_c0 + 1-O-beta-D-Glucopyranosyl_anthranilate_c0	((AT2G43840.2.CDS) or (AT2G43820.1.CDS) or (AT2G43840.1.CDS))
Palmitoyl-CoA_c0 + 1-Palmitoylglycerol_3-phosphate_c0 -> CoA_c0 + dipalmitoyl_phosphatidate_c0	((AT4G30580.1.CDS) or (AT4G24160.1.CDS) or (AT1G75020.2.CDS) or (AT3G18850.1.CDS) or (AT1G80950.1.CDS) or (AT3G57650.1.CDS) or (AT1G51260.1.CDS) or (AT3G18850.4.CDS) or (AT3G18850.3.CDS) or (AT3G18850.5.CDS) or (AT1G78690.1.CDS) or (AT3G18850.2.CDS) or (AT4G24160.2.CDS) or (AT1G75020.1.CDS))
1-Palmitoylglycerol_3-phosphate_w0 + Palmitoyl-CoA_w0 -> CoA_w0 + dipalmitoyl_phosphatidate_w0	(AT1G78690.1.CDS)
Palmitoyl-CoA_c0 + 1-Acyl-sn-glycerol_3-phosphate_c0 -> CoA_c0 + 1-9Z-octadecenoyl-2-hexadecanoyl-sn-glycero-3-phosphate_c0	((AT4G30580.1.CDS) or (AT4G24160.1.CDS) or (AT1G75020.2.CDS) or (AT3G18850.1.CDS) or (AT1G80950.1.CDS) or (AT3G57650.1.CDS) or (AT1G51260.1.CDS) or (AT3G18850.4.CDS) or (AT3G18850.3.CDS) or (AT3G18850.5.CDS) or (AT1G78690.1.CDS) or (AT3G18850.2.CDS) or (AT4G24160.2.CDS) or (AT1G75020.1.CDS))
Palmitoyl-CoA_w0 + 1-Acyl-sn-glycerol_3-phosphate_w0 -> CoA_w0 + 1-9Z-octadecenoyl-2-hexadecanoyl-sn-glycero-3-phosphate_w0	(AT1G78690.1.CDS)
H2O_c0 + 1F-beta-D-Fructosylsucrose_c0 -> Sucrose_c0 + beta-D-Fructose_c0	((AT5G11920.2.CDS) or (AT1G55120.1.CDS) or (AT5G11920.1.CDS) or (AT1G55120.3.CDS) or (AT1G55120.2.CDS))
3R-3-hydroxy-arachidoyl-CoA_x0 -> H2O_x0 + 2E-arachidoenoyl-CoA_x0	(AT1G76150.1.CDS)
3R-3-hydroxy-behenoyl-CoA_x0 -> H2O_x0 + 2E-docosenoyl-CoA_x0	(AT1G76150.1.CDS)
3R-3-hydroxy-lignoceroyl-CoA_x0 -> H2O_x0 + 2E-lignocerenoyl-CoA_x0	(AT1G76150.1.CDS)
3R-3-hydroxy-cerotoyl-CoA_x0 -> H2O_x0 + 2E-cerotenoyl-CoA_x0	(AT1G76150.1.CDS)
UDP-glucose_c0 + 4-Amino-2_6-dinitrotoluene_c0 -> UDP_c0 + 4-ADNT_glucoside_c0	((AT2G15490.3.CDS) or (AT2G15480.2.CDS) or (AT2G15490.1.CDS) or (AT2G15490.2.CDS) or (AT2G15480.1.CDS) or (AT2G36750.1.CDS) or (AT4G34135.2.CDS) or (AT2G36790.1.CDS) or (AT4G34135.1.CDS) or (AT1G05680.1.CDS))
H_c0 + UDP-glucose_c0 + 5-methylthiopentylhydroximate_c0 -> UDP_c0 + 4-Methylthiobutyl-desulfoglucosinolate_c0	(AT2G31790.1.CDS)
H_c0 + UDP-glucose_c0 + 6-methylthiohexylhydroximate_c0 -> UDP_c0 + 5-methylthiopentyldesulfoglucosinolate_c0	(AT2G31790.1.CDS)
H_c0 + UDP-glucose_c0 + 7-methylthioheptylhydroximate_c0 -> UDP_c0 + 6-methylthiohexyldesulfoglucosinolate_c0	(AT2G31790.1.CDS)
H_c0 + UDP-glucose_c0 + 8-methylthiooctylhydroximate_c0 -> UDP_c0 + 7-methylthioheptyldesulfoglucosinolate_c0	(AT2G31790.1.CDS)
H_c0 + UDP-glucose_c0 + 9-methylthiononylhydroximate_c0 -> UDP_c0 + 8-methylthiooctyldesulfoglucosinolate_c0	(AT2G31790.1.CDS)
H2O_w0 + Adenosine_w0 -> beta-D-Ribofuranose_w0 + Adenine_w0	((AT5G18860.1.CDS) or (AT2G36310.1.CDS))
H2O_w0 + Inosine_w0 -> beta-D-Ribofuranose_w0 + Hypoxanthine_w0	(AT5G18860.1.CDS)
H2O_d0 + Tributyrin_d0 -> H_d0 + 1_2-dibutyrin_d0 + Butanoic_acid_d0	((AT1G51440.1.CDS) or (AT2G15230.1.CDS) or (AT2G31690.1.CDS) or (AT2G30550.1.CDS) or (AT1G05800.1.CDS) or (AT1G06800.1.CDS) or (AT5G04040.1.CDS) or (AT4G16820.1.CDS) or (AT1G06800.2.CDS) or (AT2G30550.2.CDS))
2 Cytochromes-C-Oxidized_m0 + ubiquinol8_m0 -> 2 H_m0 + 2 Cytochromes-C-Reduced_m0 + Ubiquinone-8_m0	((AT2G01090.1.CDS) or (AT5G40810.2.CDS) or (AT5G40810.1.CDS) or (AT2G07727.1.CDS) or (AT5G13430.1.CDS) or (AT1G15120.1.CDS) or (AT3G10860.1.CDS) or (AT3G02090.1.CDS) or (AT2G01090.2.CDS) or (AT5G13440.1.CDS) or (AT1G51980.1.CDS) or (AT5G05370.1.CDS) or (AT1G51980.2.CDS) or (AT1G15120.2.CDS) or (ATMG00220.1.CDS) or (AT3G16480.1.CDS) or (AT4G32470.2.CDS) or (AT3G52730.1.CDS) or (AT3G02090.2.CDS) or…
5 H_m0 + NADH_m0 + Ubiquinone-8_m0 -> 4 H_c0 + NAD_m0 + ubiquinol8_m0	((AT4G05020.1.CDS) or (ATMG00990.1.CDS) or (AT3G03070.1.CDS) or (AT1G14450.1.CDS) or (AT5G63510.2.CDS) or (AT2G33220.1.CDS) or (AT5G47890.1.CDS) or (AT2G27730.1.CDS) or (AT3G12260.1.CDS) or (AT1G47260.1.CDS) or (AT1G19580.1.CDS) or (AT4G28220.1.CDS) or (AT2G02050.1.CDS) or (AT5G67590.1.CDS) or (AT5G08530.1.CDS) or (ATMG00070.1.CDS) or (AT3G62790.1.CDS) or (AT1G70760.1.CDS) or (ATCG01250.1.CDS) or…
5 H_c0 + NADH_c0 + Ubiquinone-8_c0 -> 4 H_w0 + NAD_c0 + ubiquinol8_c0	((AT4G05020.1.CDS) or (ATMG00990.1.CDS) or (AT3G03070.1.CDS) or (AT1G14450.1.CDS) or (AT5G63510.2.CDS) or (AT2G33220.1.CDS) or (AT5G47890.1.CDS) or (AT2G27730.1.CDS) or (AT3G12260.1.CDS) or (AT1G47260.1.CDS) or (AT1G19580.1.CDS) or (AT4G28220.1.CDS) or (AT2G02050.1.CDS) or (AT5G67590.1.CDS) or (AT5G08530.1.CDS) or (ATMG00070.1.CDS) or (AT3G62790.1.CDS) or (AT1G70760.1.CDS) or (ATCG01250.1.CDS) or…
H_r0 + Hexadecanoic_acid_r0 + NADPH_r0 + Oxygen_r0 -> H2O_r0 + NADP_r0 + 16-Hydroxypalmitate_r0	(AT4G00360.1.CDS)
UDP-glucose_v0 + Brassicasterol_v0 -> UDP_v0 + 3-O-beta-D-brassicasterol-glucoside_v0	((AT3G07020.1.CDS) or (AT3G07020.2.CDS))
UDP-glucose_w0 + Brassicasterol_w0 -> UDP_w0 + 3-O-beta-D-brassicasterol-glucoside_w0	((AT3G07020.1.CDS) or (AT3G07020.2.CDS))
UDP-glucose_v0 + Stigmasterol_v0 -> UDP_v0 + 3-O-beta-D-glucopyranosylstigmasterol_v0	((AT3G07020.1.CDS) or (AT3G07020.2.CDS))
UDP-glucose_w0 + Stigmasterol_w0 -> UDP_w0 + 3-O-beta-D-glucopyranosylstigmasterol_w0	((AT3G07020.1.CDS) or (AT3G07020.2.CDS))
UDP-glucose_v0 + Cholesterol_v0 -> UDP_v0 + Cholesteryl-beta-D-glucoside_v0	((AT3G07020.1.CDS) or (AT3G07020.2.CDS))
Cholesterol_w0 + UDP-glucose_w0 -> UDP_w0 + Cholesteryl-beta-D-glucoside_w0	((AT3G07020.1.CDS) or (AT3G07020.2.CDS))
UDP-glucose_v0 + beta-Sitosterol_v0 -> UDP_v0 + 3-O-beta-D-glucosyl-beta-sitosterol_v0	((AT3G07020.1.CDS) or (AT3G07020.2.CDS))
beta-Sitosterol_w0 + UDP-glucose_w0 -> UDP_w0 + 3-O-beta-D-glucosyl-beta-sitosterol_w0	((AT3G07020.1.CDS) or (AT3G07020.2.CDS))
Palmitoyl-CoA_d0 + sn-Glycerol_3-phosphate_d0 -> CoA_d0 + 1-Palmitoylglycerol_3-phosphate_d0	((AT1G32200.1.CDS) or (AT1G32200.2.CDS))
Stearoyl-CoA_d0 + sn-Glycerol_3-phosphate_d0 -> CoA_d0 + 1-octadecanoyl-sn-glycerol_3-phosphate_d0	((AT1G32200.1.CDS) or (AT1G32200.2.CDS))
sn-Glycerol_3-phosphate_v0 + Palmitoyl-CoA_v0 -> CoA_v0 + 1-Palmitoylglycerol_3-phosphate_v0	((AT4G01950.1.CDS) or (AT1G06520.1.CDS) or (AT1G32200.1.CDS) or (AT1G32200.2.CDS) or (AT1G02390.1.CDS) or (AT5G60620.1.CDS))
sn-Glycerol_3-phosphate_v0 + Stearoyl-CoA_v0 -> CoA_v0 + 1-octadecanoyl-sn-glycerol_3-phosphate_v0	((AT4G01950.1.CDS) or (AT1G06520.1.CDS) or (AT1G32200.1.CDS) or (AT1G32200.2.CDS) or (AT1G02390.1.CDS) or (AT5G60620.1.CDS))
sn-Glycerol_3-phosphate_v0 + 9Z-octadec-9-enoyl-CoA_v0 -> CoA_v0 + 1-Acyl-sn-glycerol_3-phosphate_v0	(AT1G06520.1.CDS)
UDP-glucose_v0 + Solasodine_v0 -> UDP_v0 + beta-D-glucopyranoside__3beta_22alpha_25R-spirosol-5-en-3-yl_v0	((AT3G07020.1.CDS) or (AT1G43620.3.CDS) or (AT3G07020.2.CDS) or (AT1G43620.1.CDS) or (AT1G43620.2.CDS))
UDP-glucose_w0 + Solasodine_w0 -> UDP_w0 + beta-D-glucopyranoside__3beta_22alpha_25R-spirosol-5-en-3-yl_w0	((AT3G07020.1.CDS) or (AT3G07020.2.CDS))
Glutathione_d0 + Dinitrochlorobenzene_d0 -> H_d0 + Cl-_d0 + S-2_4-Dinitrophenylglutathione_d0	((AT2G47730.1.CDS) or (AT4G02520.1.CDS))
Peptidylproline_omega=180_w0 -> Peptidylproline_omega=0_w0	(AT4G34870.1.CDS)
NADPH_d0 + Ox-Thioredoxin_d0 -> H_d0 + NADP_d0 + Red-Thioredoxin_d0	(AT2G41680.1.CDS)
H2O_c0 + Ethanolamine_phosphate_c0 -> Orthophosphate_c0 + Ethanolamine_c0	(AT1G17710)
H2O_d0 + phosphatidate_d -> Orthophosphate_d0 + 1-2-Diacylglycerol_d0	((At3g09520) or(AT2G01180))
H2O_c0 + DIHYDRO-SPHINGOSINE-phospate_c0 -> Orthophosphate_c0 + DIHYDRO-SPHINGOSINE_c0	(AT3G58490)
H2O_m0 + beta-D-Glucose_6-phosphate_m0 -> Orthophosphate_m0 + beta-D-Glucose_m0	(AT1G13900)
H2O_d0 + D-Glucose_1-phosphate_d0 -> Orthophosphate_d0 + D-Glucose_d0	(AT5G50400)
CDP-choline_c0 + 1,2-Diacyl-sn-glycerol_c0 -> CMP_c0 + 1-18_3-2-18_1-phosphatidylcholine_c0	(AT3G15820)
H2O_c0 + 3-Phosphoadenylyl_sulfate_c0 -> Orthophosphate_c0 + Adenylyl_sulfate_c0	(AT4G29270)
