# Supplementary material for: Critical assessment of genome-scale metabolic models of Arabidopsis thaliana
Source: Royal Society of Chemistry journal article supplement (doi:10.1039/d1mo00351h), 2021-12-16
Supplement: d1mo00351h2.xlsx [file d1mo00351h2.xlsx]

## Sheet: Sheet1
13C-MFA reaction identifier	Description	Arameta	AraGEM	Aramodel2012	Aracell	Aramodel2015
chex2	Cytosolic aldolase	[reac_77 + reac_132 ]/2	[( + R02732_c - R01070N_c) + R00762_c]/2	[(z_6PFRUCTPHOS-RXN_c' + rxn65_c - z_F16BDEPHOS-RXN_c') + rxn283_c]/2	[(6PFRUCTPHOS-RXN_c + 2.7.1.90-RXN_c - F16BDEPHOS-RXN_c) + F16ALDOLASE-RXN_c]/2	[(rxn15298_c0 + rxn15493_c0 - rxn15116_c0) + rxn15494_c0]/2
phex1	Plastidic aldolase	N.A.	[(R04779_p - R00762_p) + R01070N_p] / 2	[(rxn125_p - rxn284_p) + rxn283_p] / 2	[(6PFRUCTPHOS-RXN_d - F16BDEPHOS-RXN_d) + F16ALDOLASE-RXN_d] / 2	[(rxn19015_d0 - rxn19684_d0) + rxn19683_d0] / 2
Cphex	Glyceraldehyde-3-P DH	[([(reac_343 + - ) + (-reac_558 - )]/2 + reac_20) + (reac_114 + ) + (reac_92 + )]/3	[([(R01061_c + R01061_p - R01063_p) + (-R01512_c - R01512_d)]/2 + ) + (R01518_c + R01518_p) + (R00658_c + R00658_p)]/3	[([(rxn309_c + rxn309_p - rxn12_p) + (-rxn512_c - rxn512_p)]/2 + rxn16_c) + (rxn108_c + rxn108_p) + (rxn84_c + rxn84_p)]/3	[([(GAPOXNPHOSPHN-RXN_c + GAPOXNPHOSPHN-RXN_d - 1.2.1.13-RXN_d) + (-PHOSGLYPHOS-RXN_c - PHOSGLYPHOS-RXN_d)]/2 + 1.2.1.9-RXN_c) + (3PGAREARR-RXN_c + 3PGAREARR-RXN_d) + (2PGADEHYDRAT-RXN_c + 2PGADEHYDRAT-RXN_d)]/3	[([(rxn00781_c0 + rxn19762_d0 - rxn17199_d0) + (-rxn01100_c0 - rxn20544_d0)]/2 + rxn00779_c0) + (rxn01106_c0 + ) + (rxn00459_c0 + rxn17748_d0)]/3
chex3	Cytosolic pyruvate kinase	reac_551 - reac_593	R00200_c - NA	rxn503_c - z_PYRUVATEORTHOPHOSPHATE-DIKINASE-RXN_c'	PEPDEPHOS-RXN_c - PYRUVATEORTHOPHOSPHATE-DIKINASE-RXN_c	rxn00148_c0 - rxn00151_c0
phex2	Plastidic pyruvate kinase	N.A.	R00200_p - R00206_p	rxn503_p - z_PYRUVATEORTHOPHOSPHATE-DIKINASE-RXN_d'	PEPDEPHOS-RXN_p - PYRUVATEORTHOPHOSPHATE-DIKINASE-RXN_p	rxn20509_d0 - rxn20655_d0
tca2	Citrate synthase	[ - + reac_236 + PyrDH]/3	[ -TCM1 + R00351_m + R00209_m]/3	[ -TR_met1078_c_m + rxn221_m + rxn551_m]/3	[ -PYRUVATE_mc + CITSYN-RXN_m + PYRUVDEH-RXN_m]/3	[ -rxn31155_m0 + rxn19316_m0 ]/3
